# Supplementary material for: Palladium-catalyzed cross-coupling of cyclopropanol-derived ketone homoenolates with aryl bromides
Source: Royal Society of Chemistry journal article supplement (doi:10.1039/c3cc42080a), 2013-01-01

*Rosa and Orellana*

# **Palladium-Catalyzed Cross-Coupling of Cyclopropanol-Derived Ketone Homoenolates with Aryl Bromides**

David Rosa and Arturo Orellana

Department of Chemistry, Faculty of Science, York University  
4700 Keele Street, Toronto, Ontario  
M3J 1P3 Canada

[aorellan@yorku.ca](mailto:aorellan@yorku.ca)

1 (416) 736-2100 x 70760

## **Supporting Information**

### **Table of contents**

|                                                 |    |
|-------------------------------------------------|----|
| General Experimental                            | 2  |
| Preparation of Cyclopropanols                   | 3  |
| Reaction Development                            | 12 |
| Cross-Coupling Reactions                        | 17 |
| <sup>1</sup> H- and <sup>13</sup> C-NMR Spectra | 48 |

*Rosa and Orellana*

## General Experimental

Reactions were conducted in flame- or oven-dried glassware under an atmosphere of argon using freshly distilled solvents unless specified otherwise. Commercial reagents were used as received. Toluene was distilled from  $\text{CaH}_2$  prior to use. Tetrahydrofuran was distilled from sodium/benzophenone.

Thin-layer chromatography was performed on Merck silica gel 60 F254 plates. Visualization was carried out using UV light and/or  $\text{KMnO}_4$ , anisaldehyde or  $(\text{NH}_4)_2\text{Ce}(\text{NO}_3)_6$  solutions. Hexanes (ACS grade), ethyl acetate (EtOAc, CHROMASOLV<sup>®</sup> for HPLC), diethyl ether (ACS grade) and pentane (ACS grade) were used as received. Flash column chromatography<sup>i</sup> was carried out using Aldrich silica gel (60 Å, 230 - 400 mesh).

$^1\text{H}$ -NMR and  $^{13}\text{C}$ -NMR spectra were recorded on a Bruker 400 AV or Bruker 300 AV spectrometer in chloroform- $d$  (99.8% deuterated). Spectra recorded using chloroform were calibrated to 7.28 ppm  $^1\text{H}$  and 77.23 ppm  $^{13}\text{C}$ . Chemical shifts ( $\delta$ ) are reported in ppm and multiplicities are indicated by s (singlet), d (doublet), q (quartet), t (triplet), quint (quintet), m (multiplet), br (broad). Coupling constants  $J$  are reported in Hertz (Hz). Infrared (IR) spectra were recorded as thin films (neat) in NaCl cells using a Mattson Genesis II FT-IR instrument. Mass Spectrometry was conducted at the Mass Spectrometry Facility of Queen's University on either a Waters/Micromass GC-TOF instrument with an EI source or an Applied Biosystems/MDS Sciex QStar XL QqTOF instrument with and ESI source.

Rosa and Orellana

*General procedure 1: Synthesis of Cyclopropanols Using the Kulinkovich Reaction - 1*

**Cyclopropanol 1**

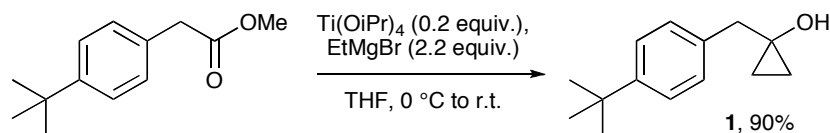

An oven dried 100 mL round-bottomed flask equipped with a stir bar was charged with methyl *p*-*tert*-butylphenylacetate (2.0 g, 2.0 mL, 9.7 mmol, 1.0 equiv.), capped with a rubber septum and flushed with argon for 10 minutes. To the flask was added freshly distilled tetrahydrofuran (THF, 30 mL) and the resulting solution cooled to 0 °C with an ice bath. Once cold, neat titanium(IV) isopropoxide (0.551 g, 0.600 mL, 1.9 mmol, 0.2 equiv.) was added via a syringe. Freshly prepared ethylmagnesium bromide (21.0 mmol, 0.7 M in THF, 2.2 equiv.) was then added drop wise via a cannula over a period of 40 minutes, and the reaction was allowed to warm to ambient temperature. The progress of the reaction was monitored by thin-layer chromatography (TLC). Once complete, the reaction was quenched with aqueous 1M HCl, diluted with EtOAc and the phases were separated. The organic phase was washed with brine, dried using  $\text{MgSO}_4$  and concentrated *in vacuo*. The crude product was purified by flash column chromatography using a 17% solution of EtOAc in hexanes. Cyclopropanol 1 (1.780 g, 8.7 mmol) was isolated as a white solid in 90% yield.

*Rosa and Orellana*

Data for **1**

<sup>1</sup>H NMR (400 MHz, CDCl<sub>3</sub>)

δ 7.39 (d, *J* = 8.0 Hz, 2 H), 7.27 (d, *J* = 8.0 Hz, 2 H), 2.82 (s, 2 H),  
2.07 (bs, 1 H), 1.36 (s, 9 H), 0.85 (dd, *J* = 6.8, 5.2 Hz, 2 H),  
0.68 (dd, *J* = 6.8, 5.2 Hz, 2 H).

<sup>13</sup>C NMR (100 MHz, CDCl<sub>3</sub>)

δ 149.3, 135.4, 129.0, 125.4, 56.0, 43.5, 34.3, 31.3, 13.1.

IR Mattson Genesis II FT-IR instrument (thin film, NaCl)

ν = 3364, 2920, 2860, 1673, 1462, 1376, 722 cm<sup>-1</sup>

m.p. 43 °C

HRMS EI

Calculated for C<sub>14</sub>H<sub>20</sub>O [M<sup>+</sup>] = 204.1514, found = 204.1522

Rosa and Orellana

## Cyclopropanol **17**

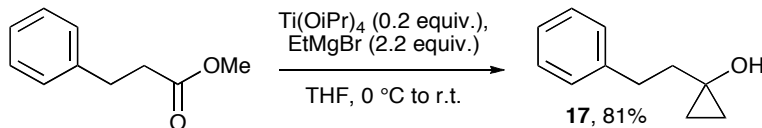

Following *General Procedure 1*, methyl 3-phenylpropanoate (1.08 g, 6.6 mmol, 1.0 equiv.) was converted to cyclopropanol **17**. Purification by flash column chromatography using a 20% solution of EtOAc in hexanes afforded the product (0.396 g, 5.3 mmol) as a clear oil in 81% yield.

### Data for **17**

$^1\text{H}$  NMR (400 MHz,  $\text{CDCl}_3$ )

$\delta$  7.32 (t,  $J = 7.2$  Hz, 2 H), 7.25 (d,  $J = 7.2$  Hz, 2 H), 7.22 (t,  $J = 7.2$  Hz, 1 H),  
2.88 (dd,  $J = 9.2, 6.8$  Hz, 2 H), 1.91 (dd,  $J = 9.2, 6.4$  Hz, 2 H),  
0.79 (dd,  $J = 6.4, 5.2$  Hz, 2 H), 0.49 (dd,  $J = 6.8, 5.2$  Hz, 2 H).

$^{13}\text{C}$  NMR (100 MHz,  $\text{CDCl}_3$ )

$\delta$  142.1, 128.4, 128.3, 125.8, 55.7, 40.3, 32.4, 13.6.

IR Mattson Genesis II FT-IR instrument (thin film, NaCl)

$\nu = 3355, 3083, 3006, 2925, 1603, 1454, 1243, 1010, 747 \text{ cm}^{-1}$

HRMS EI

Calculated for  $\text{C}_{11}\text{H}_{14}\text{O}$  [ $\text{M}^+$ ] = 162.1045, found = 162.1042

Rosa and Orellana

## Cyclopropanol **18**

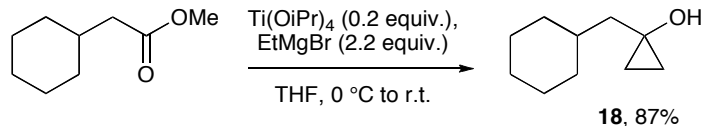

Following *General Procedure 1*, methyl 2-cyclohexylacetate (0.970 g, 6.2 mmol, 1.0 equiv.) was converted to cyclopropanol **18**. Purification by flash column chromatography using a 20% solution of EtOAc in hexanes afforded the product (0.827 g, 5.4 mmol) as a white solid in 87% yield.

### Data for **18**

<sup>1</sup>H NMR (400 MHz, CDCl<sub>3</sub>)

δ 1.88 (dd, *J* = 8.4, 1.2 Hz, 2 H), 1.81-1.65 (m, 5 H), 1.47 (d, *J* = 7.2 Hz, 2 H),  
1.30 (dq, *J* = 12.0, 2.8 Hz, 2 H), 1.18 (tquint, *J* = 12.0, 2.8 Hz, 1 H),  
0.97 (dq, *J* = 12.0, 2.8 Hz, 2 H), 0.75 (dd, *J* = 6.8, 5.6 Hz, 2 H),  
0.44 (dd, *J* = 6.8, 5.6 Hz, 2 H).

<sup>13</sup>C NMR (100 MHz, CDCl<sub>3</sub>)

δ 54.0, 45.6, 35.1, 33.7, 26.5, 26.2, 13.6.

IR Mattson Genesis II FT-IR instrument (thin film, NaCl)

ν = 3310, 2897, 1643, 1461, 1378, 724 cm<sup>-1</sup>

m.p. 34-36 °C

HRMS EI

Calculated for C<sub>10</sub>H<sub>18</sub>O [*M*<sup>+</sup>] = 154.1358, found = 154.1365

Rosa and Orellana

## Cyclopropanol **19**

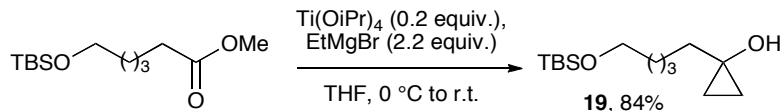

Following *General Procedure 1*, methyl 6-(*tert*-butyldimethylsilyloxy)hexanoate (1.65 g, 6.3 mmol, 1.0 equiv.) was converted to cyclopropanol **19**. Purification by flash column chromatography using a 14% solution of EtOAc in hexanes afforded the product (1.37 g, 5.3 mmol) as a clear oil in 84% yield.

### Data for **19**

$^1\text{H}$  NMR (400 MHz,  $\text{CDCl}_3$ )

$\delta$  3.64 (t,  $J$  = 6.4 Hz, 2 H), 1.56 (m, 6 H), 1.41 (m, 2 H), 0.91 (s, 9 H),  
 0.75 (t,  $J$  = 6.0 Hz, 2 H), 0.46 (t,  $J$  = 6.0 Hz, 2 H), 0.07 (s, 6 H).

$^{13}\text{C}$  NMR (100 MHz,  $\text{CDCl}_3$ )

$\delta$  63.1, 55.7, 38.2, 32.7, 25.9, 25.7, 25.6, 18.3, 13.4,  $-5.4$ .

IR Mattson Genesis II FT-IR instrument (thin film, NaCl)

$\nu$  = 3014, 2935, 2854, 1635, 1463, 1388, 1101, 835  $\text{cm}^{-1}$

HRMS EI

Calculated for  $\text{C}_{14}\text{H}_{30}\text{O}_2\text{Si}$  [ $\text{M}^+$ ] = 258.2015, found = 258.2027

Rosa and Orellana

## Cyclopropanol **20**

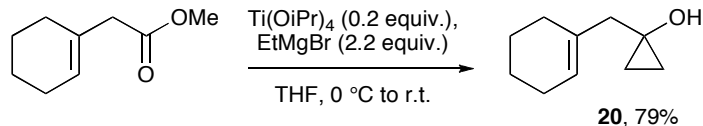

Following *General Procedure 1*, methyl 2-cyclohexenylacetate (0.500 g, 3.3 mmol, 1.0 equiv.) was converted to cyclopropanol **20**. Purification by flash column chromatography using a 20% solution of EtOAc in hexanes afforded the product (0.396 g, 2.6 mmol) as a clear oil in 79% yield.

### Data for **20**

$^1\text{H}$  NMR (400 MHz,  $\text{CDCl}_3$ )

$\delta$  5.64 (bs, 1 H), 2.20 (s, 2 H), 2.07 (m, 5 H), 1.68-1.59 (m, 4 H),

0.79 (dd,  $J = 6.8, 5.2$  Hz, 2 H), 0.48 (dd,  $J = 6.8, 5.2$  Hz, 2 H).

$^{13}\text{C}$  NMR (100 MHz,  $\text{CDCl}_3$ )

$\delta$  135.0, 124.4, 53.6, 46.4, 29.0, 25.2, 22.8, 22.3, 12.6.

IR Mattson Genesis II FT-IR instrument (thin film, NaCl)

$\nu = 3382, 3002, 2928, 2862, 1660, 1448, 1012 \text{ cm}^{-1}$

HRMS EI

Calculated for  $\text{C}_{10}\text{H}_{16}\text{O}$  [ $\text{M}^+$ ] = 152.1201, found = 152.1208



Rosa and Orellana

General procedure 2: Synthesis of Cyclopropanols Using the *Cha*<sup>ii</sup> modification of the Kulinkovich Reaction

**Cyclopropanol 21**

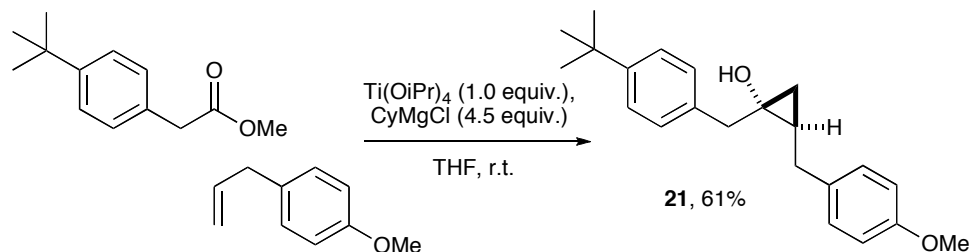

An oven dried 50 mL round-bottomed flask equipped with a stir bar was charged with methyl *p*-*tert*-butylphenylacetate (0.500 g, 0.500 mL, 2.4 mmol, 1.0 equiv.), 4-allylanisole (0.533 g, 0.553 mL, 3.6 mmol, 1.5 equiv.), capped with a rubber septum and flushed with argon for 10 minutes at ambient temperature. To the flask was added freshly distilled THF (18 mL) and the resulting solution was stirred vigorously. Neat titanium(IV) isopropoxide (0.682 g, 0.741 mL, 2.4 mmol, 1.0 equiv.) was added *via* syringe. With the aid of a syringe pump, commercial grade cyclohexylmagnesium chloride (11.0 mmol, 5.4 mL, 2.0 M in diethylether, 4.5 equiv.) was added dropwise over a period of 90 minutes. The progress of the reaction was monitored by TLC analysis. Once complete, the reaction was quenched with aqueous 1M HCl, diluted with EtOAc and the phases were separated. The organic phase was washed with brine, dried using  $\text{MgSO}_4$  and concentrated *in vacuo*. The crude product was purified by flash column chromatography using a 12% solution of EtOAc in hexanes. Cyclopropanol **21** (0.476 g, 1.5 mmol) was isolated as a clear oil in 61% yield.

*Rosa and Orellana*

Data for **21**

<sup>1</sup>H NMR (400 MHz, CDCl<sub>3</sub>)

δ 7.40 (d, *J* = 8.0 Hz, 2 H), 7.30 (d, *J* = 8.0 Hz, 2 H), 7.23 (d, *J* = 8.4 Hz, 2 H),  
6.90 (d, *J* = 8.4 Hz, 2 H), 3.84 (s, 3 H), 3.10 (d, *J* = 14.4 Hz, 1 H),  
2.92 (dd, *J* = 15.2, 6.4 Hz, 1 H), 2.84 (d, *J* = 14.4 Hz, 1 H),  
2.56 (dd, *J* = 15.2, 8.8 Hz, 1 H), 2.04 (bs, 1 H), 1.50 (m, 1 H), 1.36 (s, 9 H),  
1.03 (dd, *J* = 10.0, 6.0 Hz, 1 H), 0.57 (t, *J* = 6.0 Hz, 1 H).

<sup>13</sup>C NMR (100 MHz, CDCl<sub>3</sub>)

δ 157.8, 149.4, 135.1, 133.3, 129.0, 129.0, 125.5, 113.7, 59.1, 55.2, 39.4, 34.7,  
34.3, 31.3, 25.9, 19.8.

IR Mattson Genesis II FT-IR instrument (thin film, NaCl)

$\nu$  = 3404, 2961, 2868, 1612, 1513, 1462, 1248, 1036, 815 cm<sup>-1</sup>

HRMS EI

Calculated for C<sub>22</sub>H<sub>28</sub>O<sub>2</sub> [M<sup>+</sup>] = 324.2089, found = 324.2103

Rosa and Orellana

## Cyclopropanol **22**

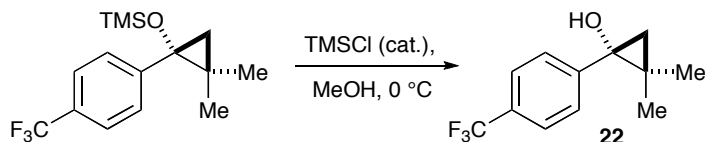

A dry 10 mL roundbottomed flask equipped with a stir bar was charged with the corresponding siloxycyclopropane (0.100 g, 0.33 mmol, 1.0 equiv.), capped with a rubber septum and flushed with argon for 10 minutes at ambient temperature. To the flask was added dry methanol (4 mL) and the resulting solution was cooled to 0 °C. Once cold, a single drop of chlorotrimethylsilane was added. Consumption of the siloxycyclopropane was monitored using TLC. Once complete, the reaction was concentrated to dryness *in vacuo*. Crude cyclopropanol **22** (0.75 g, 0.33 mmol) was obtained as a yellow oil in nearly quantitative yield.

### Data for **22**

<sup>1</sup>H NMR (400 MHz, CDCl<sub>3</sub>)

δ 7.61 (d, *J* = 8.0 Hz, 2 H), 7.51 (d, *J* = 8.0 Hz, 2 H), 2.00 (bs, 1 H), 1.42 (s, 3 H),

1.15 (d, *J* = 6.0 Hz, 2 H), 0.84 (d, *J* = 6.0 Hz, 2 H), 0.78 (s, 3 H).

<sup>13</sup>C NMR (100 MHz, CDCl<sub>3</sub>)

δ 145.4, 129.2 (q, <sup>2</sup>*J*<sub>C-F</sub> = 32.0 Hz), 128.2, 125.0 (q, <sup>3</sup>*J*<sub>C-F</sub> = 4.0 Hz),

123.1 (q, <sup>1</sup>*J*<sub>C-F</sub> = 270.0 Hz), 64.0, 24.7, 24.1, 22.6, 20.0.

<sup>19</sup>F NMR (376 MHz, CDCl<sub>3</sub>)

−62.7

IR Mattson Genesis II FT-IR instrument (thin film, NaCl)

ν = 3389, 2923, 2864, 1648, 1454, 871, 759 cm<sup>−1</sup>

HRMS EI

Calculated for C<sub>11</sub>H<sub>13</sub>OF<sub>3</sub> [*M*<sup>+</sup>] = 230.0918, found = 230.0927

Rosa and Orellana

*General procedure 3: Deprotection of siloxycyclopropanes*

**Cyclopropanol **23****

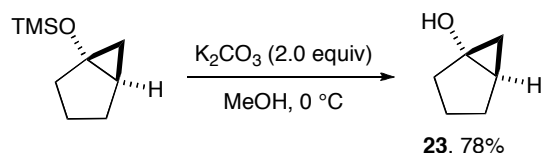

A dry 25 mL round bottom flask equipped with a stir bar was charged the (bicyclo[3.1.0]hexan-1-yloxy)trimethylsilane (0.400 g, 2.3 mmol, 1.0 equiv.), capped with a rubber septum and flushed with argon for 10 minutes at ambient temperature. To the flask was added dry methanol (MeOH, 10 mL) and the resulting solution was cooled to 0 °C. Once cold, solid potassium carbonate (0.636 g, 4.6 mmol, 2.0 equiv.) was added in one portion. Consumption of the siloxycyclopropane was monitored using TLC. Once complete, the reaction was quenched with a saturated aqueous solution of NH<sub>4</sub>Cl, diluted with EtOAc and the phases separated. The organic phase was washed with brine, dried over anhydrous MgSO<sub>4</sub> and concentrated *in vacuo*. The crude product was purified by flash column chromatography using a 33% solution of ether in pentane. Cyclopropanol **23** (0.176 g, 1.8 mmol) was isolated as a clear oil in 78% yield. Spectral data obtained for this compound is consistent with that reported by Murai and co-workers.<sup>3</sup>

**Cyclopropanol **24****

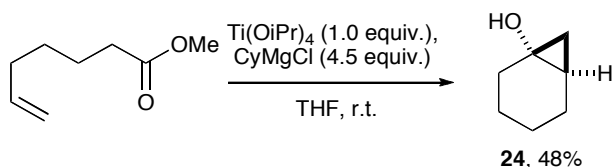

Following *General Procedure 2*, methyl hept-6-enoate (0.200 g, 1.4 mmol, 1.0 equiv.) was converted to cyclopropanol **24**. Purification by flash column chromatography using an 11% solution of EtOAc in hexanes afforded the desired product (0.075 g, 0.67 mmol) as a clear oil in 48% yield. Spectral data obtained for this compound is consistent with that reported by Narasaka and co-workers.<sup>iii</sup>

Rosa and Orellana

## Cyclopropanol **25**

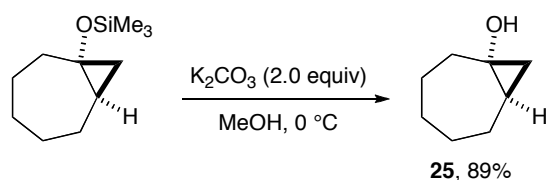

Following *General Procedure 3*, the (bicyclo[3.1.0]hexan-1-yloxy)trimethylsilane (bicyclo[5.1.0]octan-1-yloxy)trimethylsilane (0.200 g, 1.0 mmol, 1.0 equiv.), was converted to cyclopropanol **25**. Purification by flash column chromatography using a 33% solution of ether in pentane afforded the product (0.112 g, 0.89 mmol) as a powdery white solid in 89% yield. Spectral data is consistent with those reported by Murai and co-workers.<sup>iv</sup>

Rosa and Orellana

### Reaction Development

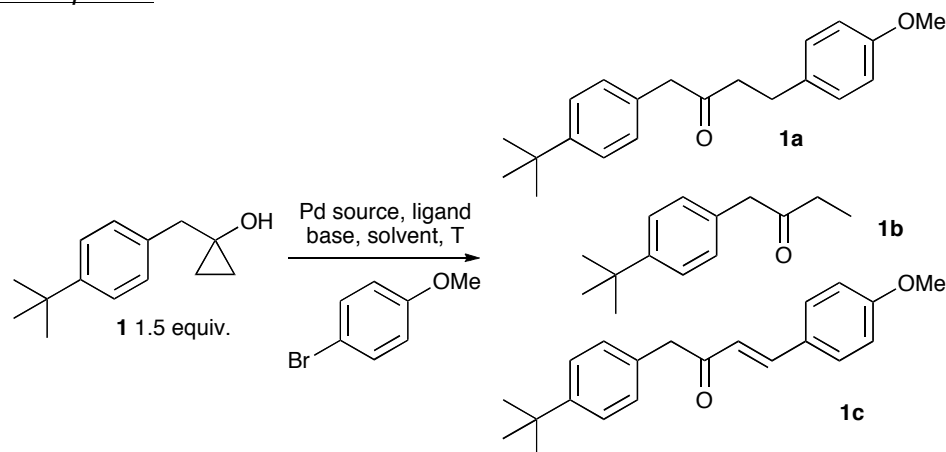

| Pd source (equiv.) <sup>a</sup> | Ligand (equiv.)                               | Base (equiv.)                         | Solvent | Temp. (°C) | <b>1a</b> <sup>b</sup> | <b>1b</b> <sup>b</sup> | <b>1c</b> <sup>b</sup> |
|---------------------------------|-----------------------------------------------|---------------------------------------|---------|------------|------------------------|------------------------|------------------------|
| Pd(OAc) <sub>2</sub> (0.1)      | dppp (0.2)                                    | K <sub>2</sub> CO <sub>3</sub> (2.0)  | Toluene | 80         | 59%                    | 16%                    | 5%                     |
| Pd(OAc) <sub>2</sub> (0.1)      | Xantphos (0.2)                                | Cs <sub>2</sub> CO <sub>3</sub> (2.0) | Toluene | 80         | 46%                    | 22%                    | 0%                     |
| Pd(OAc) <sub>2</sub> (0.1)      | dppp (0.2)                                    | Cs <sub>2</sub> CO <sub>3</sub> (2.0) | Toluene | 80         | 77%                    | 0%                     | 0%                     |
| Pd(OAc) <sub>2</sub> (0.1)      | PPh <sub>3</sub> (0.4)                        | Cs <sub>2</sub> CO <sub>3</sub> (2.0) | Toluene | 80         | 53%                    | 18%                    | 0%                     |
| Pd(OAc) <sub>2</sub> (0.1)      | DavePhos (0.2)                                | Cs <sub>2</sub> CO <sub>3</sub> (2.0) | Toluene | 80         | 62%                    | 15%                    | 0%                     |
| Pd(OAc) <sub>2</sub> (0.1)      | dppe (0.2)                                    | Cs <sub>2</sub> CO <sub>3</sub> (2.0) | Toluene | 80         | 73%                    | 0%                     | 0%                     |
| Pd(OAc) <sub>2</sub> (0.1)      | dppf (0.2)                                    | Cs <sub>2</sub> CO <sub>3</sub> (2.0) | Toluene | 80         | 77%                    | 0%                     | 0%                     |
| Pd(OAc) <sub>2</sub> (0.1)      | S-Phos (0.2)                                  | Cs <sub>2</sub> CO <sub>3</sub> (2.0) | Toluene | 80         | 64%                    | 18%                    | 0%                     |
| Pd(OAc) <sub>2</sub> (0.1)      | X-Phos (0.2)                                  | Cs <sub>2</sub> CO <sub>3</sub> (2.0) | Toluene | 80         | 49%                    | 36%                    | 0%                     |
| Pd(OAc) <sub>2</sub> (0.1)      | P(tBu) <sub>3</sub> (0.4)                     | Cs <sub>2</sub> CO <sub>3</sub> (2.0) | Toluene | 80         | 46%                    | 36%                    | 0%                     |
| Pd(OAc) <sub>2</sub> (0.1)      | P(Cy) <sub>2</sub> buP(Cy) <sub>2</sub> (0.2) | Cs <sub>2</sub> CO <sub>3</sub> (2.0) | Toluene | 80         | 79%                    | <5%                    | 0%                     |
| Peppsi-IPr (0.1)                | n/a                                           | Cs <sub>2</sub> CO <sub>3</sub> (2.0) | Toluene | 80         | 0%                     | 86%                    | 0%                     |
| Pd(OAc) <sub>2</sub> (0.1)      | P(Cy) <sub>2</sub> buP(Cy) <sub>2</sub> (0.2) | Ag <sub>2</sub> CO <sub>3</sub> (2.0) | Toluene | 80         | 21%                    | 62%                    | 0%                     |
| Pd(OAc) <sub>2</sub> (0.1)      | P(Cy) <sub>2</sub> buP(Cy) <sub>2</sub> (0.2) | K <sub>2</sub> CO <sub>3</sub> (2.0)  | Toluene | 80         | 8%                     | 82%                    | 0%                     |
| Pd(OAc) <sub>2</sub> (0.1)      | P(Cy) <sub>2</sub> buP(Cy) <sub>2</sub> (0.2) | Na <sub>2</sub> CO <sub>3</sub> (2.0) | Toluene | 80         | 0%                     | 0%                     | 0%                     |

Rosa and Orellana

*Reaction Development – Continued*

| <b>Pd source</b><br>(equiv.) <sup>a</sup>  | <b>Ligand</b><br>(equiv.)                               | <b>Base</b><br>(equiv.)                 | <b>Solvent</b> | <b>Temp.</b><br>(°C) | <b>1a<sup>b</sup></b> | <b>1b<sup>b</sup></b> | <b>1c<sup>b</sup></b> |
|--------------------------------------------|---------------------------------------------------------|-----------------------------------------|----------------|----------------------|-----------------------|-----------------------|-----------------------|
| Pd(OAc) <sub>2</sub><br>(0.1)              | P(Cy) <sub>2</sub> buP(Cy) <sub>2</sub><br>(0.2 equiv)  | K <sub>3</sub> PO <sub>4</sub><br>(2.0) | Toluene        | 80                   | 86%                   | <5%                   | 0%                    |
| Pd(OAc) <sub>2</sub><br>(0.1)              | P(Cy) <sub>2</sub> buP(Cy) <sub>2</sub><br>(0.2 equiv)  | KOtBu<br>(2.0)                          | Toluene        | 80                   | 0%                    | 90%                   | 0%                    |
| Pd(OAc) <sub>2</sub><br>(0.1)              | P(Cy) <sub>2</sub> buP(Cy) <sub>2</sub><br>(0.2 equiv)  | CsOAc<br>(2.0)                          | Toluene        | 80                   | 24%                   | 60%                   | 0%                    |
| Pd(OAc) <sub>2</sub><br>(0.1)              | P(Cy) <sub>2</sub> buP(Cy) <sub>2</sub><br>(0.2 equiv)  | KOAc<br>(2.0)                           | Toluene        | 80                   | 8%                    | 74%                   | 0%                    |
| Pd(OAc) <sub>2</sub><br>(0.1)              | P(Cy) <sub>2</sub> buP(Cy) <sub>2</sub><br>(0.2 equiv)  | K <sub>3</sub> PO <sub>4</sub><br>(2.0) | DMA            | 80                   | 60%                   | 26%                   | 0%                    |
| Pd(OAc) <sub>2</sub><br>(0.1)              | P(Cy) <sub>2</sub> buP(Cy) <sub>2</sub><br>(0.2 equiv)  | K <sub>3</sub> PO <sub>4</sub><br>(2.0) | NMP            | 80                   | 65%                   | 24%                   | 0%                    |
| Pd(OAc) <sub>2</sub><br>(0.1)              | P(Cy) <sub>2</sub> buP(Cy) <sub>2</sub><br>(0.2 equiv)  | K <sub>3</sub> PO <sub>4</sub><br>(2.0) | DME            | 80                   | 81%                   | <5%                   | 0%                    |
| Pd(OAc) <sub>2</sub><br>(0.1)              | P(Cy) <sub>2</sub> buP(Cy) <sub>2</sub><br>(0.2 equiv)  | K <sub>3</sub> PO <sub>4</sub><br>(2.0) | MeCN           | 80                   | 56%                   | 32%                   | 0%                    |
| Pd(OAc) <sub>2</sub><br>(0.1)              | P(Cy) <sub>2</sub> buP(Cy) <sub>2</sub><br>(0.2 equiv)  | K <sub>3</sub> PO <sub>4</sub><br>(2.0) | THF            | 60                   | 67%                   | 12%                   | 0%                    |
| Pd(OAc) <sub>2</sub><br>(0.05)             | P(Cy) <sub>2</sub> buP(Cy) <sub>2</sub><br>(0.10 equiv) | K <sub>3</sub> PO <sub>4</sub><br>(2.0) | Toluene        | 80                   | 81%                   | 8%                    | 0%                    |
| Pd(OAc) <sub>2</sub><br>(0.025)            | P(Cy) <sub>2</sub> buP(Cy) <sub>2</sub><br>(0.05 equiv) | K <sub>3</sub> PO <sub>4</sub><br>(2.0) | Toluene        | 80                   | 71%                   | 16%                   | 0%                    |
| Pd(OAc) <sub>2</sub><br>(0.01)             | P(Cy) <sub>2</sub> buP(Cy) <sub>2</sub><br>(0.02)       | K <sub>3</sub> PO <sub>4</sub><br>(2.0) | Toluene        | 80                   | 64%                   | 18%                   | 0%                    |
| Pd(OAc) <sub>2</sub><br>(0.1)              | dppb<br>(0.2)                                           | K <sub>3</sub> PO <sub>4</sub><br>(2.0) | Toluene        | 80                   | 83%                   | 0%                    | 0%                    |
| Pd(OAc) <sub>2</sub><br>(0.1)              | P(Ph) <sub>2</sub> pentP(Ph) <sub>2</sub><br>(0.2)      | K <sub>3</sub> PO <sub>4</sub><br>(2.0) | Toluene        | 80                   | 79%                   | 9%                    | 0%                    |
| Pd(OAc) <sub>2</sub><br>(0.1)              | P(Cy) <sub>2</sub> etP(Cy) <sub>2</sub><br>(0.2)        | K <sub>3</sub> PO <sub>4</sub><br>(2.0) | Toluene        | 80                   | 82%                   | <5%                   | 0%                    |
| Pd(OAc) <sub>2</sub><br>(0.1)              | P(Cy) <sub>2</sub> prP(Cy) <sub>2</sub><br>(0.2)        | K <sub>3</sub> PO <sub>4</sub><br>(2.0) | Toluene        | 80                   | 0%                    | 0%                    | 0%                    |
| Pd(OAc) <sub>2</sub><br>(0.1)              | dppe<br>(0.2)                                           | K <sub>3</sub> PO <sub>4</sub><br>(2.0) | Toluene        | 80                   | 79%                   | <1%                   | <7%                   |
| Pd(OAc) <sub>2</sub><br>(0.1)              | dppf<br>(0.2)                                           | K <sub>3</sub> PO <sub>4</sub><br>(2.0) | Toluene        | 80                   | 77%                   | <3%                   | 0%                    |
| Pd <sub>2</sub> dba <sub>3</sub><br>(0.05) | P(Cy) <sub>2</sub> buP(Cy) <sub>2</sub><br>(0.2)        | K <sub>3</sub> PO <sub>4</sub><br>(2.0) | Toluene        | 80                   | 71%                   | 18%                   | 0%                    |

Rosa and Orellana

*Reaction Development – Continued*

| <b>Pd source</b><br>(equiv.) <sup>a</sup> | <b>Ligand</b><br>(equiv.)                          | <b>Base</b><br>(equiv.)                 | <b>Solvent</b> | <b>Temp.</b><br>(°C) | <b>1a<sup>b</sup></b> | <b>1b<sup>b</sup></b> | <b>1c<sup>b</sup></b> |
|-------------------------------------------|----------------------------------------------------|-----------------------------------------|----------------|----------------------|-----------------------|-----------------------|-----------------------|
| PdCl <sub>2</sub><br>(0.1)                | P(Cy) <sub>2</sub> buP(Cy) <sub>2</sub><br>(0.2)   | K <sub>3</sub> PO <sub>4</sub><br>(2.0) | Toluene        | 80                   | 68%                   | 21%                   | 0%                    |
| Pd(OAc) <sub>2</sub><br>(0.1)             | P(Cy) <sub>2</sub> buP(Cy) <sub>2</sub><br>(0.3)   | K <sub>3</sub> PO <sub>4</sub><br>(2.0) | Toluene        | 80                   | 83%                   | 8%                    | 0%                    |
| Pd(OAc) <sub>2</sub><br>(0.05)            | dppb<br>(0.1)                                      | K <sub>3</sub> PO <sub>4</sub><br>(2.0) | Toluene        | 80                   | 81%                   | 10%                   | 0%                    |
| Pd(OAc) <sub>2</sub><br>(0.1)             | P(Ph) <sub>2</sub> pentP(Ph) <sub>2</sub><br>(0.2) | K <sub>3</sub> PO <sub>4</sub><br>(2.0) | Toluene        | 80                   | 79%                   | 9%                    | 0%                    |
| Pd(OAc) <sub>2</sub><br>(0.1)             | P(Cy) <sub>2</sub> etP(Cy) <sub>2</sub><br>(0.2)   | K <sub>3</sub> PO <sub>4</sub><br>(2.0) | Toluene        | 80                   | 82%                   | <5%                   | 0%                    |
| Pd(OAc) <sub>2</sub><br>(0.1)             | dppb<br>(0.2)                                      | K <sub>3</sub> PO <sub>4</sub><br>(2.0) | Toluene        | 60                   | 72%                   | 15%                   | 0%                    |
| Pd(OAc) <sub>2</sub><br>(0.1)             | dppb<br>(0.2)                                      | K <sub>3</sub> PO <sub>4</sub><br>(2.0) | Toluene        | 21                   | 11%                   | 68%                   | 0%                    |
| Pd(OAc) <sub>2</sub><br>(0.1)             | dppb<br>(0.2)                                      | K <sub>3</sub> PO <sub>4</sub><br>(2.0) | Toluene        | 80                   | 79% <sup>c</sup>      | 0%                    | 0%                    |

<sup>a</sup> All reactions conducted on a 0.24 mmol scale and 0.1 M concentration of starting material unless otherwise stated. <sup>b</sup> Isolated yields. <sup>c</sup> Reaction conducted on a 1.92 mmol scale and 0.1 M concentration of starting material.



Rosa and Orellana

*General procedure 4: Cross-Coupling of Cyclopropanols with Aryl Bromides*

**Ketone 1a**

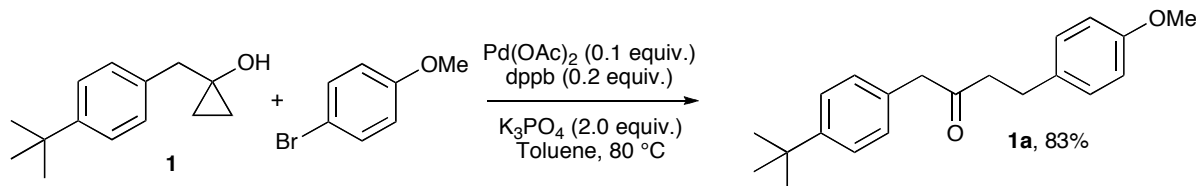

An oven dried 15 mL test tube equipped with a stir bar was charged with cyclopropanol **1** (0.050 g, 0.24 mmol, 1.0 equiv.), palladium diacetate ( $\text{Pd}(\text{OAc})_2$ , 0.005 g, 0.024 mmol, 0.10 equiv.), 1,4-bis(diphenylphosphino)butane (dppb) (0.020 g, 0.048 mmol, 0.20 equiv.) and  $\text{K}_3\text{PO}_4$  (0.106 g, 0.48 mmol, 2.0 equiv.). The reaction vessel was capped with a rubber septum and flushed with argon for 10 minutes at ambient temperature prior to the addition of toluene (2.4 mL). The resulting mixture was stirred at room temperature for 5 minutes. Neat 4-bromoanisole (0.067 g, 0.045 mL, 0.36 mmol, 1.5 equiv.) was added *via* syringe. The resulting mixture was heated to 80 °C with the aid of an oil bath. Reaction progress was monitored using TLC. Once complete, the crude reaction mixture was diluted with ethyl acetate (EtOAc), filtered through a plug of silica and concentrated *in vacuo*. Flash column chromatography of the resulting crude product using a 7% solution of EtOAc in hexanes afforded ketone **1a** as a clear oil (0.062 g, 0.20 mmol) in 83% yield.

*Rosa and Orellana*

Data for **1a**

<sup>1</sup>H NMR (400 MHz, CDCl<sub>3</sub>)

δ 7.35 (d, *J* = 8.0 Hz, 2 H), 7.12 (d, *J* = 8.0 Hz, 2 H), 7.07 (d, *J* = 8.4 Hz, 2 H), 6.82 (d, *J* = 8.4 Hz, 2 H), 3.80 (s, 3 H), 3.65 (s, 2 H), 2.83 (t, *J* = 6.8 Hz, 2 H), 2.76 (t, *J* = 6.8 Hz, 2 H), 1.33 (s, 9 H).

<sup>13</sup>C NMR (100 MHz, CDCl<sub>3</sub>)

δ 207.8, 157.8, 149.8, 132.9, 130.9, 129.1, 128.9, 125.5, 113.7, 55.1, 49.8, 43.6, 34.3, 31.2, 28.8.

IR Mattson Genesis II FT-IR instrument (thin film, NaCl)

$\nu$  = 2935, 2869, 1712, 1611, 1513, 1247, 1036, 823 cm<sup>-1</sup>

HRMS EI

Calculated for C<sub>21</sub>H<sub>26</sub>O<sub>2</sub> [M<sup>+</sup>] = 310.1933, found = 310.1946

Rosa and Orellana

## Ketone 2a

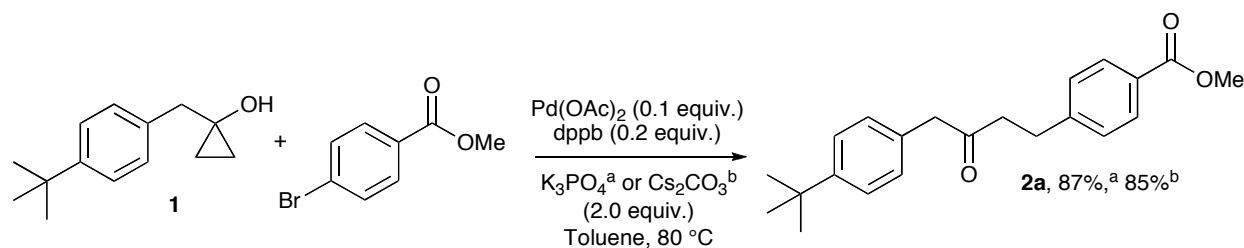

Following *General Procedure 4* cyclopropanol **1a** (0.050 g, 0.24 mmol, 1.0 equiv.) was coupled to methyl 4-bromobenzoate (0.077 g, 0.36 mmol, 1.5 equiv.). Purification by flash column chromatography using an 11% solution of EtOAc in hexanes afforded the ketone **2a** (0.071 g, 0.21 mmol) as a white powdery solid in 87% yield. Using  $\text{Cs}_2\text{CO}_3$ , ketone **2a** (0.066 g, 0.20 mmol) was prepared in 85% yield.

### Data for **2a**

$^1\text{H NMR}$  (400 MHz,  $\text{CDCl}_3$ )

$\delta$  7.93 (d,  $J = 8.0$  Hz, 2 H), 7.34 (d,  $J = 8.0$  Hz, 2 H), 7.20 (d,  $J = 8.0$  Hz, 2 H),  
7.11 (d,  $J = 8.0$  Hz, 2 H), 3.92 (s, 3 H), 3.66 (s, 2 H), 2.94 (t,  $J = 7.2$  Hz, 2 H),  
2.81 (t,  $J = 7.2$  Hz, 2 H), 1.33 (s, 9 H).

$^{13}\text{C NMR}$  (100 MHz,  $\text{CDCl}_3$ )

$\delta$  207.0, 166.9, 149.9, 146.4, 130.7, 129.7, 128.9, 128.3, 127.9, 125.6, 51.9, 49.8,  
42.6, 34.3, 31.2, 29.5.

**IR** Mattson Genesis II FT-IR instrument (thin film, NaCl)

$\nu = 3068, 3023, 2926, 1727, 1711, 1460, 1232, 951 \text{ cm}^{-1}$

**m.p.** 47°C

**HRMS** EI

Calculated for  $\text{C}_{22}\text{H}_{26}\text{O}_3$  [ $\text{M}^+$ ] = 338.1882, found = 338.1895

Rosa and Orellana

### Ketones **3a** and **3c**

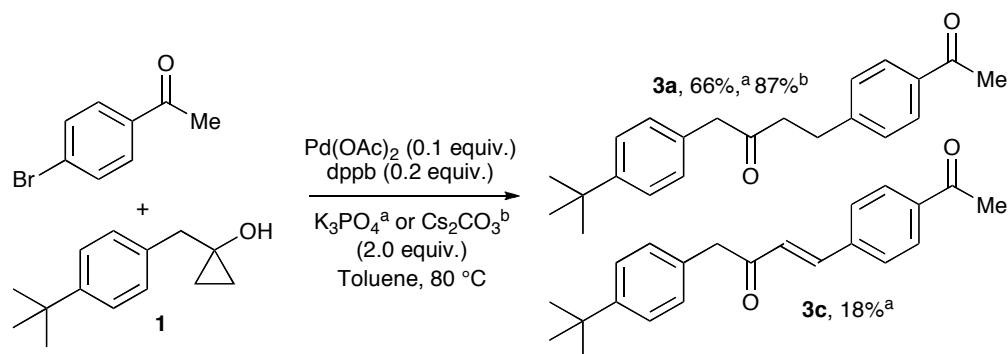

Following *General Procedure 4*, cyclopropanol **1** (0.050 g, 0.24 mmol, 1.0 equiv.) and using  $\text{Cs}_2\text{CO}_3$  was coupled with 4'-bromoacetophenone (0.072 g, 0.36 mmol, 1.5 equiv.). Purification by flash column chromatography using a 10% solution of EtOAc in hexanes afforded ketone **3a** (0.067 g, 0.21 mmol) as a clear oil in 87% yield. Using  $\text{K}_3\text{PO}_4$ , ketone **3a** (0.051 g, 0.16 mmol) was isolated in 66% yield and was accompanied by ketone **3c** (0.014 g, 0.04 mmol) in 18% yield.

#### Data for **3a**

<sup>1</sup>H NMR (400 MHz,  $\text{CDCl}_3$ )

$\delta$  7.86 (d,  $J = 8.0$  Hz, 2 H), 7.35 (d,  $J = 8.0$  Hz, 2 H), 7.23 (d,  $J = 8.0$  Hz, 2 H),  
7.12 (d,  $J = 8.0$  Hz, 2 H), 3.66 (s, 2 H), 2.94 (t,  $J = 7.2$  Hz, 2 H),  
2.82 (t,  $J = 7.2$  Hz, 2 H), 2.59 (s, 3 H), 1.33 (s, 9 H).

<sup>13</sup>C NMR (100 MHz,  $\text{CDCl}_3$ )

$\delta$  206.9, 197.5, 149.9, 146.7, 135.2, 130.7, 128.9, 128.5, 125.6, 49.7, 42.6, 34.3,  
31.2, 30.8, 29.5, 26.4.

IR Mattson Genesis II FT-IR instrument (thin film, NaCl)

$\nu = 2963, 2905, 2869, 1713, 1681, 1607, 1268, 823 \text{ cm}^{-1}$

HRMS EI

Calculated for  $\text{C}_{22}\text{H}_{26}\text{O}_2$  [ $\text{M}^+$ ] = 322.1933, found = 322.1941

*Rosa and Orellana*

Data for **3c**

<sup>1</sup>H NMR (400 MHz, CDCl<sub>3</sub>)

δ 7.97 (d, *J* = 8.4 Hz, 2 H), 7.65 (d, *J* = 16.0 Hz, 1 H), 7.62 (d, *J* = 8.0 Hz, 2 H),  
7.39 (d, *J* = 8.4 Hz, 2 H), 7.22 (d, *J* = 8.0 Hz, 2 H), 6.88 (d, *J* = 16.0 Hz, 1 H),  
3.94 (s, 2 H), 2.63 (s, 3 H), 1.34 (s, 9 H).

<sup>13</sup>C NMR (100 MHz, CDCl<sub>3</sub>)

δ 197.1, 197.0, 149.9, 141.3, 138.8, 138.1, 130.8, 129.0, 128.7, 128.3, 127.2,  
125.7, 48.1, 34.4, 31.2, 26.5.

IR Mattson Genesis II FT-IR instrument (thin film, NaCl)

ν = 2961, 1675, 1616, 1411, 1360, 1270, 1074 cm<sup>-1</sup>

m.p. 93 °C

HRMS EI

Calculated for C<sub>22</sub>H<sub>24</sub>O<sub>2</sub> [M<sup>+</sup>] = 320.1776, found = 320.1784

Rosa and Orellana

### Ketone 4a

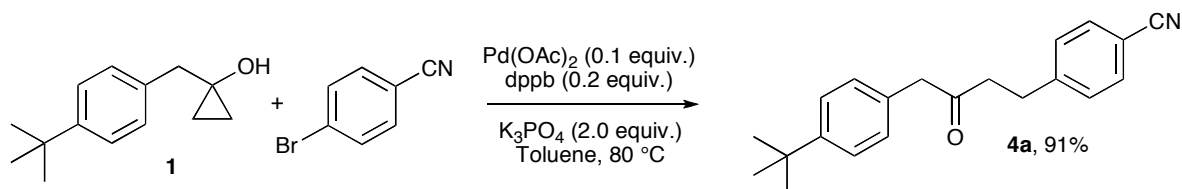

Following *General Procedure 4*, cyclopropanol **1** (0.050 g, 0.24 mmol, 1.0 equiv.) was coupled with 4-bromobenzonitrile (0.066 g, 0.36 mmol, 1.5 equiv.). Purification by flash column chromatography using a 10% solution of EtOAc in hexanes afforded ketone **4a** (0.067 g, 0.20 mmol) as a clear oil in 91% yield.

#### Data for **4a**

**<sup>1</sup>H NMR** (400 MHz,  $\text{CDCl}_3$ )

$\delta$  7.54 (d,  $J$  = 8.0 Hz, 2 H), 7.35 (d,  $J$  = 8.0 Hz, 2 H), 7.23 (d,  $J$  = 8.0 Hz, 2 H),  
7.10 (d,  $J$  = 8.0 Hz, 2 H), 3.66 (s, 2 H), 2.94 (t,  $J$  = 7.2 Hz, 2 H),  
2.82 (t,  $J$  = 7.2 Hz, 2 H), 1.33 (s, 9 H).

**<sup>13</sup>C NMR** (100 MHz,  $\text{CDCl}_3$ )

$\delta$  206.6, 150.0, 146.6, 132.1, 130.5, 129.1, 128.9, 125.6, 118.9, 109.8, 49.7,  
42.2, 34.4, 31.2, 29.5.

**IR** Mattson Genesis II FT-IR instrument (thin film, NaCl)

$\nu$  = 2943, 2893, 2221, 1713, 1609, 936, 724  $\text{cm}^{-1}$

**m.p.** 64 °C

**HRMS** EI

Calculated for  $\text{C}_{21}\text{H}_{23}\text{ON}$  [ $\text{M}^+$ ] = 305.1780, found = 305.1791

Rosa and Orellana

## Ketone 5a

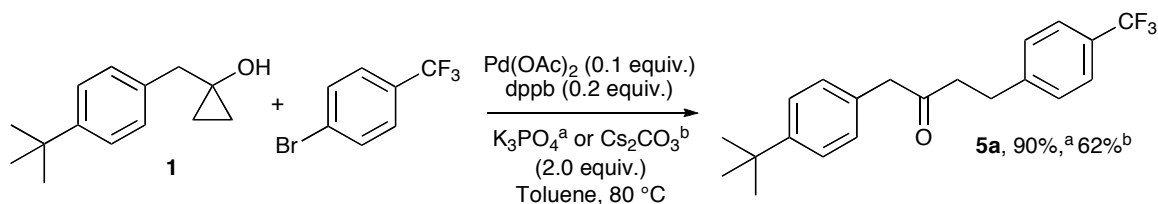

Following *General Procedure 4*, cyclopropanol **1a** (0.050 g, 0.24 mmol, 1.0 equiv.) was coupled to 4-bromo- $\alpha,\alpha,\alpha$ -trifluorotoluene (0.081 g, 0.36 mmol, 1.5 equiv.). Purification by flash column chromatography using a 10% solution of EtOAc in hexanes afforded ketone **5a** (0.075 g, 0.22 mmol) as a white solid in 90% yield. Using  $\text{Cs}_2\text{CO}_3$ , ketone **5a** (0.052 g, 0.15 mmol) was prepared in 62% yield.

### Data for **5a**

**<sup>1</sup>H NMR** (400 MHz,  $\text{CDCl}_3$ )

$\delta$  7.51 (d,  $J = 8.0$  Hz, 2 H), 7.35 (d,  $J = 8.0$  Hz, 2 H), 7.25 (d,  $J = 8.0$  Hz, 2 H),  
7.11 (d,  $J = 8.0$  Hz, 2 H), 3.66 (s, 2 H), 2.92 (t,  $J = 7.2$  Hz, 2 H),  
2.82 (t,  $J = 7.2$  Hz, 2 H), 1.33 (s, 9 H).

**<sup>13</sup>C NMR** (100 MHz,  $\text{CDCl}_3$ )

$\delta$  206.9, 149.9, 145.0, 130.6, 128.9, 128.6, 128.6 (q,  $^2J_{\text{C-F}} = 32.0$  Hz), 125.6, 125.2  
(q,  $^3J_{\text{C-F}} = 4.0$  Hz), 124.1 (q,  $^1J_{\text{C-F}} = 271.0$  Hz), 49.8, 42.6, 34.3, 31.2, 29.3.

**<sup>19</sup>F NMR** (376 MHz,  $\text{CDCl}_3$ )

−62.3

**IR** Mattson Genesis II FT-IR instrument (thin film, NaCl)

$\nu = 3012, 2964, 1718, 1615, 1447, 962, 793 \text{ cm}^{-1}$

**m.p.** 64 °C

**HRMS** EI

Calculated for  $\text{C}_{21}\text{H}_{23}\text{F}_3\text{O}$  [ $\text{M}^+$ ] = 348.1701, found = 348.1715

Rosa and Orellana

## Ketone 6a

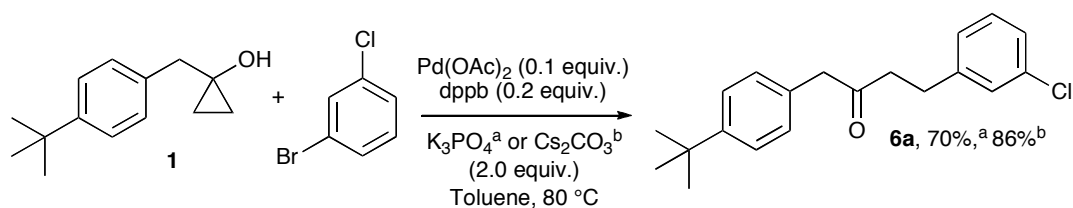

Following *General Procedure 4* and utilizing  $\text{Cs}_2\text{CO}_3$  as a base, cyclopropanol **1** (0.050 g, 0.24 mmol, 1.0 equiv.) was coupled with 3-bromochlorobenzene (0.069 g, 0.36 mmol, 1.5 equiv.). Purification by flash column chromatography using a 7% solution of EtOAc in hexanes afforded ketone **6a** (0.067 g, 0.21 mmol) as a clear oil in 86% yield. Using  $\text{K}_3\text{PO}_4$ , ketone **6a** (0.053 g, 0.17 mmol) was prepared in 70% yield.

### Data for **6a**

#### $^1\text{H}$ NMR (400 MHz, $\text{CDCl}_3$ )

$\delta$  7.36 (d,  $J$  = 8.0 Hz, 2 H), 7.19 (m, 2 H), 7.12 (d,  $J$  = 8.0 Hz, 3 H),  
7.03 (d,  $J$  = 6.4 Hz, 1 H), 3.66 (s, 2 H), 2.87 (dt,  $J$  = 6.8, 1.6 Hz, 2 H),  
2.79 (dt,  $J$  = 6.8, 1.6 Hz, 2 H), 1.34 (s, 9 H).

#### $^{13}\text{C}$ NMR (100 MHz, $\text{CDCl}_3$ )

$\delta$  207.1, 149.9, 142.9, 134.0, 130.7, 129.6, 128.9, 128.4, 126.5, 126.2, 125.6,  
49.8, 42.8, 34.4, 31.2, 29.2.

#### IR Mattson Genesis II FT-IR instrument (thin film, NaCl)

$\nu$  = 3057, 2960, 2903, 1721, 1598, 1476, 1363, 1079, 781  $\text{cm}^{-1}$

#### HRMS EI

Calculated for  $\text{C}_{20}\text{H}_{23}\text{ClO}$  [ $\text{M}^+$ ] = 314.1437, found = 314.1449



Rosa and Orellana

### Ketone 7a

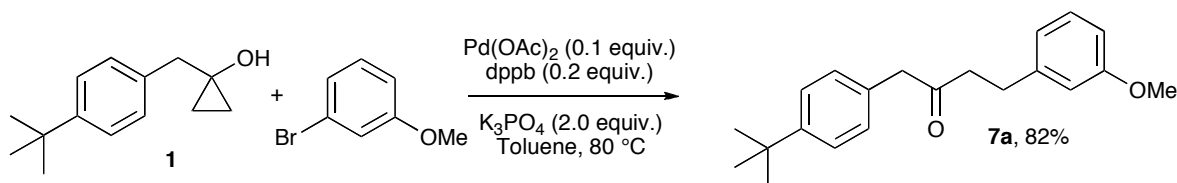

Following *General Procedure 4* and cyclopropyl alcohol **1** (0.050 g, 0.24 mmol, 1.0 equiv.) was coupled to 3-bromoanisole (0.067 g, 0.36 mmol, 1.5 equiv.). Purification by flash column chromatography using a 3% solution of EtOAc in hexanes afforded ketone **7a** (0.063 g, 0.20 mmol) as a clear oil in 82% yield.

#### Data for **7a**

<sup>1</sup>H NMR (400 MHz, CDCl<sub>3</sub>)

δ 7.36 (d,  $J$  = 8.0 Hz, 2 H), 7.20 (t,  $J$  = 8.0 Hz, 1 H),  
7.13 (d,  $J$  = 8.0 Hz, 2 H), 6.75 (d,  $J$  = 8.0 Hz, 2 H), 6.72 (s, 1 H),  
3.80 (s, 3 H), 3.67 (s, 2 H), 2.88 (dd,  $J$  = 7.2, 1.6 Hz, 2 H),  
2.80 (dd,  $J$  = 7.2, 1.6 Hz, 2 H), 1.34 (s, 9 H).

<sup>13</sup>C NMR (100 MHz, CDCl<sub>3</sub>)

δ 207.6, 159.6, 149.8, 142.5, 130.9, 129.3, 128.9, 125.6, 120.6, 114.0,  
111.3, 55.0, 49.8, 43.2, 34.4, 31.2, 29.7.

IR Mattson Genesis II FT-IR instrument (thin film, NaCl)

$\nu$  = 2916, 2823, 1713, 1619, 1241, 1033, 817 cm<sup>-1</sup>

HRMS EI

Calculated for C<sub>21</sub>H<sub>26</sub>O<sub>2</sub> [ $\text{M}^+$ ] = 310.1933, found = 310.1946

Rosa and Orellana

### Ketone **8a**

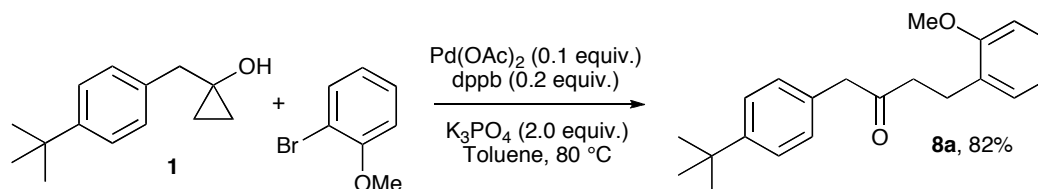

Following *General Procedure 4* cyclopropanol **1a** (0.050 g, 0.24 mmol, 1.0 equiv.) was coupled to 2-bromoanisole (0.067 g, 0.36 mmol, 1.5 equiv.). Purification by flash column chromatography using a 4% solution of EtOAc in hexanes afforded ketone **8a** (0.061 g, 0.20 mmol) as a clear oil in 82% yield.

#### Data for **8a**

##### $^1\text{H}$ NMR (400 MHz, $\text{CDCl}_3$ )

$\delta$  7.36 (d,  $J$  = 8.0 Hz, 2 H), 7.21 (t,  $J$  = 8.0 Hz, 1 H), 7.14 (d,  $J$  = 8.0 Hz, 2 H), 7.12 (d,  $J$  = 8.0 Hz, 1 H), 6.88 (t,  $J$  = 8.0 Hz, 1 H), 6.85 (d,  $J$  = 8.0 Hz, 1 H), 3.81 (s, 3 H), 3.67 (s, 2 H), 2.90 (t,  $J$  = 7.6 Hz, 2 H), 2.78 (t,  $J$  = 7.6 Hz, 2 H), 1.34 (s, 9 H).

##### $^{13}\text{C}$ NMR (100 MHz, $\text{CDCl}_3$ )

$\delta$  208.3, 157.3, 149.6, 131.1, 130.0, 129.1, 129.0, 127.3, 125.5, 120.3, 110.1, 55.0, 49.6, 41.7, 34.3, 31.3, 25.0.

##### IR Mattson Genesis II FT-IR instrument (thin film, NaCl)

$\nu$  = 3028, 2917, 1710, 1622, 1428, 1237, 1029, 766  $\text{cm}^{-1}$

##### HRMS EI

Calculated for  $\text{C}_{21}\text{H}_{26}\text{O}_2$  [ $\text{M}^+$ ] = 310.1933, found = 310.1945

Rosa and Orellana

### Ketones **9a** and **9c**

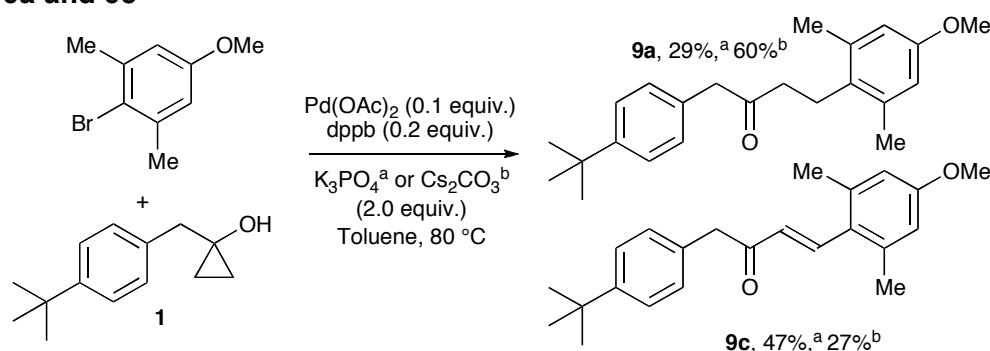

Following *General Procedure 4* and utilizing  $\text{Cs}_2\text{CO}_3$  as a base, cyclopropanol **1** (0.050 g, 0.24 mmol, 1.0 equiv.) was coupled to 4-bromo-3,5-dimethylanisole (0.077 g, 0.36 mmol, 1.5 equiv.). Purification by flash column chromatography using a 5% solution of EtOAc in hexanes afforded ketone **11a** (0.059 g, 0.14 mmol) as a clear oil in 60% yield, along with 27% of ketone **9c** (0.022 g, 0.07 mmol). Using  $\text{K}_3\text{PO}_4$ , ketones **9a** (0.024 g, 0.07 mmol) and **9c** (0.038 g, 0.11 mmol) were prepared in 29% and 47% yield, respectively.

#### Data for **9a**

##### <sup>1</sup>H NMR (400 MHz, $\text{CDCl}_3$ )

$\delta$  7.37 (d,  $J$  = 8.0 Hz, 2 H), 7.16 (d,  $J$  = 8.0 Hz, 2 H), 6.56 (s, 2 H), 3.77 (s, 3 H), 3.68 (s, 2 H), 2.80 (dd,  $J$  = 10.8, 7.6 Hz, 2 H), 2.56 (dd,  $J$  = 10.8, 7.6 Hz, 2 H), 2.20 (s, 6 H), 1.33 (s, 9 H).

##### <sup>13</sup>C NMR (100 MHz, $\text{CDCl}_3$ )

$\delta$  208.4, 157.3, 149.9, 137.3, 131.0, 129.7, 129.0, 125.6, 113.4, 55.0, 49.9, 40.8, 34.4, 31.2, 23.3, 19.9.

##### IR Mattson Genesis II FT-IR instrument (thin film, NaCl)

$\nu$  = 3015, 2982, 1712, 1513, 1235, 1043, 873  $\text{cm}^{-1}$

##### HRMS EI

Calculated for  $\text{C}_{23}\text{H}_{30}\text{O}_2$  [ $\text{M}^+$ ] = 338.2246, found = 338.2234

*Rosa and Orellana*

Data for **9c**

<sup>1</sup>H NMR (400 MHz, CDCl<sub>3</sub>)

δ 7.78 (d, *J* = 16.4 Hz, 1 H), 7.39 (d, *J* = 8.0 Hz, 2 H), 7.23 (d, *J* = 8.0 Hz, 2 H),  
6.62 (s, 2 H), 6.38 (d, *J* = 16.4 Hz, 1 H), 3.92 (s, 2 H), 3.81 (s, 3 H), 2.29 (s, 6 H),  
1.34 (s, 9 H).

<sup>13</sup>C NMR (100 MHz, CDCl<sub>3</sub>)

δ 197.8, 159.4, 149.7, 141.4, 139.2, 131.6, 129.3, 129.0, 126.3, 125.6, 113.8,  
55.0, 48.0, 34.4, 31.2, 21.5.

IR Mattson Genesis II FT-IR instrument (thin film, NaCl)

ν = 2954, 1681, 1623, 1243, 1020, 985, 814 cm<sup>-1</sup>

m.p. 74 °C

HRMS EI

Calculated for C<sub>23</sub>H<sub>28</sub>O<sub>2</sub> [M<sup>+</sup>] = 336.2089, found = 336.2103

Rosa and Orellana

### Ketone 10a

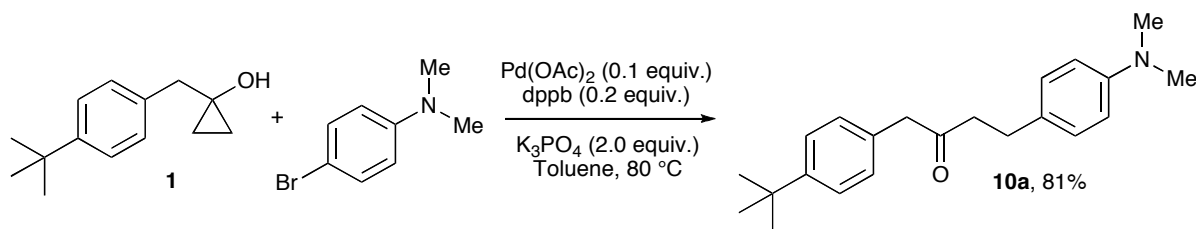

Following *General Procedure 4*, cyclopropanol **1** (0.050 g, 0.24 mmol, 1.0 equiv.) was coupled to 4-bromo-*N,N*-dimethylaniline (0.072 g, 0.36 mmol, 1.5 equiv.). Purification by flash column chromatography using a 10% solution of EtOAc in hexanes afforded ketone **10a** (0.063 g, 0.20 mmol) as a yellow oil in 81% yield.

#### Data for **10a**

##### $^1\text{H}$ NMR (400 MHz, $\text{CDCl}_3$ )

$\delta$  7.37 (d,  $J = 8.4$ , 2 H), 7.15 (d,  $J = 8.4$  Hz, 2 H), 7.06 (d,  $J = 8.4$  Hz, 2 H),  
6.71 (d,  $J = 8.4$  Hz, 2 H), 3.67 (s, 2 H), 2.94 (s, 6 H),  
2.83 (dt,  $J = 6.4$ , 2.4 Hz, 2 H), 2.77 (dt,  $J = 6.4$ , 2.4 Hz, 2 H), 1.35 (s, 9 H).

##### $^{13}\text{C}$ NMR (100 MHz, $\text{CDCl}_3$ )

$\delta$  208.2, 149.7, 149.1, 131.1, 129.0, 128.8, 125.6, 125.5, 113.0, 49.8, 43.9, 40.8,  
34.4, 31.3, 28.8.

##### IR Mattson Genesis II FT-IR instrument (thin film, NaCl)

$\nu = 2955, 2922, 2802, 1711, 1650, 1613, 1516, 1362, 812 \text{ cm}^{-1}$

##### HRMS EI

Calculated for  $\text{C}_{22}\text{H}_{29}\text{NO}$  [ $\text{M}^+$ ] = 323.2249, found = 323.2238

Rosa and Orellana

### Ketones **11a** and **11c**

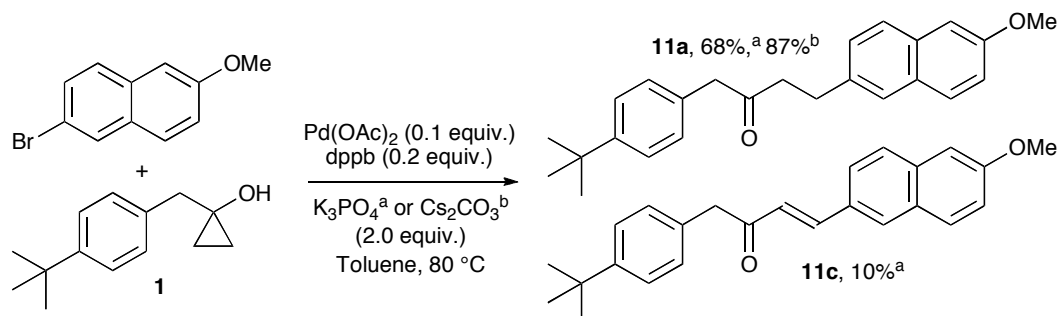

Following *General Procedure 4* and utilizing  $\text{Cs}_2\text{CO}_3$  as a base, cyclopropanol **1** (0.050 g, 0.24 mmol, 1.0 equiv.) was coupled to 6-methoxy-2-bromonaphthalene (0.085 g, 0.36 mmol, 1.5 equiv.). Purification by flash column chromatography using a 7% solution of EtOAc in hexanes afforded ketone **11a** (0.075 g, 0.21 mmol) as a white solid in 87% yield. Using  $\text{K}_3\text{PO}_4$ , ketone **11a** was prepared in 68% (0.059 g, 0.16 mmol) yield, along with unsaturated ketone **11c** in 10% yield (0.007 g, 0.02 mmol).

#### Data for **11a**

$^1\text{H}$  NMR (400 MHz,  $\text{CDCl}_3$ )

$\delta$  7.69 (dd,  $J = 8.0, 2.0$  Hz, 2 H), 7.52 (s, 1 H), 7.35 (d,  $J = 8.0$  Hz, 2 H),  
7.27 (d,  $J = 8.0$  Hz, 1 H), 7.17 (d,  $J = 2.0$  Hz, 1 H), 7.14 (m, 3 H), 3.94 (s, 3 H),  
3.68 (s, 2 H), 3.04 (t,  $J = 7.6$  Hz, 2 H), 2.88 (t,  $J = 7.6$  Hz, 2 H), 1.35 (s, 9 H).

$^{13}\text{C}$  NMR (100 MHz,  $\text{CDCl}_3$ )

$\delta$  207.7, 157.2, 149.8, 136.0, 133.0, 130.9, 129.0, 128.9, 128.8, 127.5, 126.8,  
126.2, 125.6, 118.7, 105.5, 55.2, 49.8, 43.3, 34.4, 31.2, 29.6.

IR Mattson Genesis II FT-IR instrument (thin film, NaCl)

$\nu = 3008, 2942, 1716, 1628, 1233, 1040, 866\text{ cm}^{-1}$

m.p. 79-80 °C

HRMS EI

Calculated for  $\text{C}_{25}\text{H}_{28}\text{O}_2$  [ $\text{M}^+$ ] = 360.2089, found = 360.2102.

*Rosa and Orellana*

Data for **11c**

<sup>1</sup>H NMR (400 MHz, CDCl<sub>3</sub>)

δ 7.89 (s, 1 H), 7.80 (d, *J* = 16.0 Hz, 1 H), 7.77 (d, *J* = 8.8 Hz, 1 H),  
7.73 (d, *J* = 8.8 Hz, 1 H), 7.64 (dd, *J* = 8.8, 1.2 Hz, 1 H), 7.40 (d, *J* = 8.0 Hz, 2 H),  
7.26 (d, *J* = 8.0 Hz, 2 H), 7.19 (dd, *J* = 8.8, 2.4 Hz, 1 H), 7.14 (d, *J* = 2.4 Hz, 1 H),  
6.89 (d, *J* = 16.0 Hz, 1 H), 3.97 (s, 2 H), 3.95 (s, 3 H), 1.35 (s, 9 H).

<sup>13</sup>C NMR (100 MHz, CDCl<sub>3</sub>)

δ 197.4, 158.8, 149.7, 143.5, 135.7, 131.4, 130.3, 130.1, 129.7, 129.0, 128.6,  
127.4, 125.6, 124.4, 124.2, 119.4, 105.9, 55.3, 47.8, 34.4, 31.2.

IR Mattson Genesis II FT-IR instrument (thin film, NaCl)

$\nu$  = 3114, 2908, 1685, 1627, 1241, 1027, 952, 836 cm<sup>-1</sup>

m.p. 136-138 °C

HRMS EI

Calculated for C<sub>25</sub>H<sub>26</sub>O<sub>2</sub> [*M*<sup>+</sup>] = 358.1933, found = 358.1946.

Rosa and Orellana

### Ketone 12a

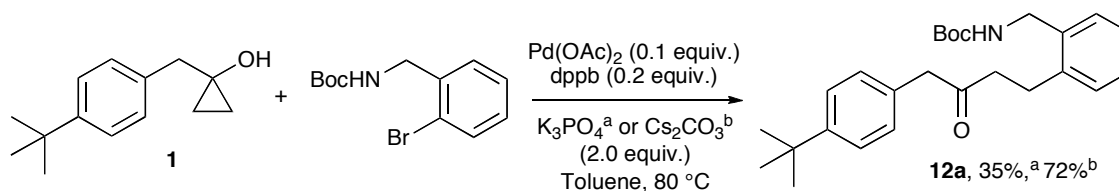

Following *General Procedure 4* and utilizing  $\text{Cs}_2\text{CO}_3^{\text{b}}$  as a base, cyclopropanol **1** (0.050 g, 0.24 mmol, 1.0 equiv.) was coupled to *N*-Boc-2-bromobenzylamine (0.103 g, 0.36 mmol, 1.5 equiv.). Purification by flash column chromatography using a 13% solution of EtOAc in hexanes afforded ketone **12a** (0.071 g, 0.17 mmol) as a white solid in 72% yield. Using  $\text{K}_3\text{PO}_4^{\text{a}}$ , ketone **12a** (0.069 g, 0.17 mmol) was prepared in 70% yield.

#### Data for **12a**

$^1\text{H}$  NMR (400 MHz,  $\text{CDCl}_3$ )

$\delta$  7.34 (d,  $J = 8.0$  Hz, 2 H), 7.26 (m, 1 H), 7.19 (m, 2 H), 7.10 (d,  $J = 8.0$  Hz, 3 H), 4.81 (bs, 1 H), 4.30 (s, 2 H), 3.66 (s, 2 H), 2.91 (t,  $J = 7.2$  Hz, 2 H), 2.78 (t,  $J = 7.2$  Hz, 2 H), 1.48 (s, 9 H), 1.33 (s, 9 H).

$^{13}\text{C}$  NMR (100 MHz,  $\text{CDCl}_3$ )

$\delta$  207.4, 155.6, 149.8, 138.8, 136.1, 130.7, 129.2, 128.9, 128.6, 127.6, 126.5, 125.6, 79.4, 49.8, 42.4, 42.0, 34.3, 31.2, 28.3, 26.1.

IR Mattson Genesis II FT-IR instrument (thin film, NaCl)

$\nu = 3002, 2953, 1728, 1712, 1455, 1024, 769 \text{ cm}^{-1}$

m.p. 77 °C

HRMS EI

Calculated for  $\text{C}_{26}\text{H}_{35}\text{NO}_3$  [ $\text{M}^+$ ] = 409.2617, found = 409.2632



Rosa and Orellana

## Ketone 13a

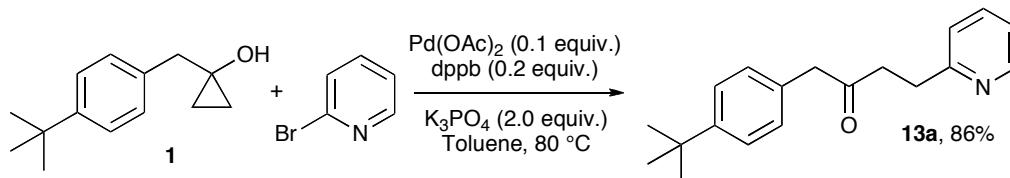

Following *General Procedure 4*, cyclopropanol **1** (0.050 g, 0.24 mmol, 1.0 equiv.) was coupled to 2-bromopyridine (0.057 g, 0.36 mmol, 1.5 equiv.). Purification by flash column chromatography using a 40% solution of EtOAc in hexanes afforded ketone **13a** (0.058 g, 0.21 mmol) as a clear oil in 86% yield.

### Data for **13a**

**<sup>1</sup>H NMR** (400 MHz,  $\text{CDCl}_3$ )

$\delta$  8.50 (d,  $J$  = 4.0 Hz, 1 H), 7.57 (t,  $J$  = 8.0 Hz, 1 H), 7.34 (d,  $J$  = 8.0 Hz, 2 H),  
7.09-7.17 (m, 4 H), 3.71 (s, 2 H), 3.07 (t,  $J$  = 6.8 Hz, 2 H), 2.99 (t,  $J$  = 6.8 Hz, 2 H),  
1.32 (s, 9 H).

**<sup>13</sup>C NMR** (100 MHz,  $\text{CDCl}_3$ )

$\delta$  207.6, 160.3, 149.6, 149.0, 136.2, 131.0, 129.0, 125.5, 123.1, 121.1, 49.6, 40.8,  
34.3, 31.7, 31.2.

**IR** Mattson Genesis II FT-IR instrument (thin film, NaCl)

$\nu$  = 3055, 3009, 2961, 2903, 2868, 1712, 1592, 1435, 1079  $\text{cm}^{-1}$

**HRMS** EI

Calculated for  $\text{C}_{19}\text{H}_{23}\text{NO}$  [ $\text{M}^+$ ] = 281.1780, found = 281.1775

Rosa and Orellana

## Ketone 14a

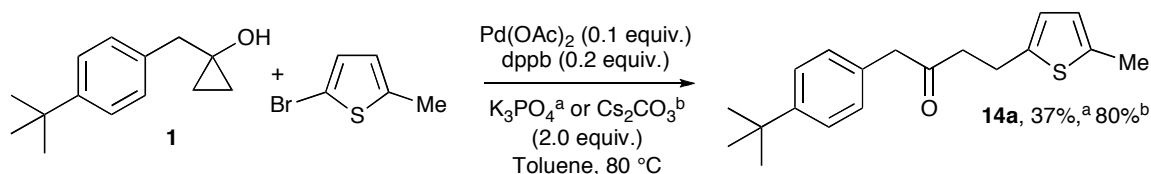

Following *General Procedure 4* and utilizing Cs<sub>2</sub>CO<sub>3</sub> as a base, cyclopropanol **1** (0.050 g, 0.24 mmol, 1.0 equiv.) was coupled to 2-bromo-5-methylthiophene (0.064 g, 0.36 mmol, 1.5 equiv.). Purification by flash column chromatography using a 5% solution of EtOAc in hexanes afforded ketone **14a** (0.058 g, 0.19 mmol) as a slightly yellow oil in 80% yield. Using K<sub>3</sub>PO<sub>4</sub>, ketone **14a** (0.027 g, 0.09 mmol) was prepared in 37% yield.

### Data for **14a**

<sup>1</sup>H NMR (400 MHz, CDCl<sub>3</sub>)

δ 7.37 (d, *J* = 8.0 Hz, 2 H), 7.15 (d, *J* = 8.0 Hz, 2 H), 6.54 (s, 2 H), 3.68 (s, 2 H), 3.03 (t, *J* = 7.2 Hz, 2 H), 2.83 (t, *J* = 7.2 Hz, 2 H), 2.44 (s, 3 H), 1.35 (s, 9 H).

<sup>13</sup>C NMR (100 MHz, CDCl<sub>3</sub>)

δ 207.2, 149.8, 141.2, 137.6, 130.8, 129.0, 125.6, 124.6, 124.2, 49.7, 43.5, 34.4, 31.2, 24.0, 15.2.

IR Mattson Genesis II FT-IR instrument (thin film, NaCl)

ν = 3100, 2961, 2921, 2869, 1714, 1515, 1462, 1363, 1079, 796 cm<sup>-1</sup>

HRMS EI

Calculated for C<sub>19</sub>H<sub>24</sub>SO [M<sup>+</sup>] = 300.1548, found = 300.1559

Rosa and Orellana

## Ketone 15a

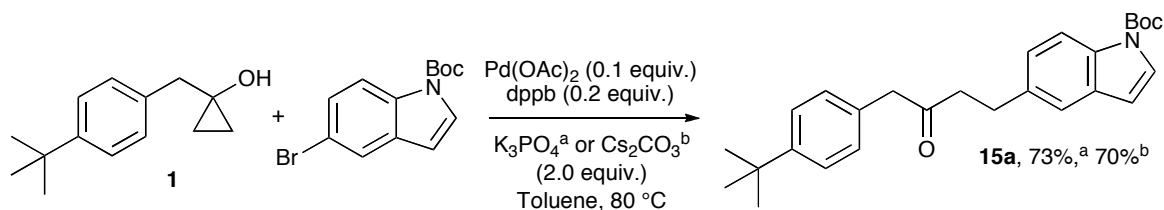

Following *General Procedure 4*, cyclopropanol **1a** (0.050 g, 0.24 mmol, 1.0 equiv.) was coupled to *N*-Boc-5-bromoindole (0.107 g, 0.36 mmol, 1.5 equiv.). Purification by flash column chromatography using a 5% solution of EtOAc in hexanes afforded ketone **15a** (0.074 g, 0.18 mmol) as a slightly yellow oil in 73% yield. Using Cs<sub>2</sub>CO<sub>3</sub>, ketone **15a** (0.070 g, 0.17 mmol) was prepared in 70% yield.

### Data for **15a**

<sup>1</sup>H NMR (400 MHz, CDCl<sub>3</sub>)

δ 8.04 (d, *J* = 7.6 Hz, 1 H), 7.59 (d, *J* = 3.2 Hz, 1 H), 7.34 (m, 3 H),  
7.12 (d, *J* = 8.0 Hz, 3 H), 6.52 (d, *J* = 4.0 Hz, 1 H), 3.65 (s, 2 H),  
2.99 (t, *J* = 7.2 Hz, 2 H), 2.83 (t, *J* = 7.2 Hz, 2 H), 1.69 (s, 9 H), 1.33 (s, 9 H).

<sup>13</sup>C NMR (100 MHz, CDCl<sub>3</sub>)

δ 207.8, 149.7, 149.7, 135.2, 133.6, 130.9, 130.7, 129.0, 126.0, 125.5, 124.7,  
120.2, 114.9, 107.0, 83.5, 49.8, 43.9, 34.3, 31.2, 29.7, 28.1.

IR Mattson Genesis II FT-IR instrument (thin film, NaCl)

ν = 2956, 2924, 2868, 1730, 1714, 1469, 1376, 1256, 1013 cm<sup>-1</sup>

HRMS EI

Calculated for C<sub>27</sub>H<sub>33</sub>NO<sub>3</sub> [M<sup>+</sup>] = 419.2460, found = 419.2472

Rosa and Orellana

### Ketones 16a

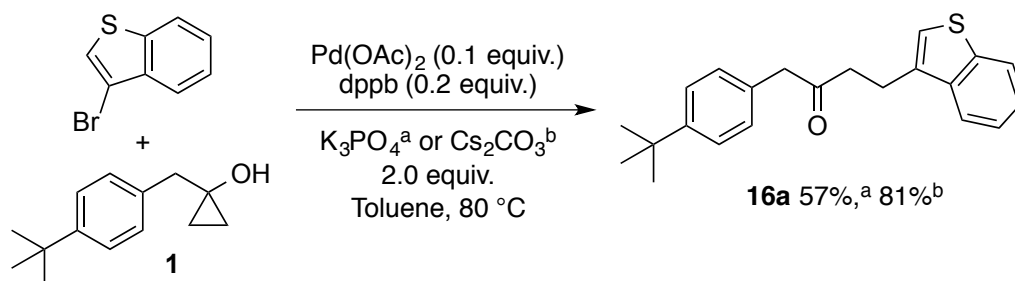

Following *General Procedure 4* and utilizing  $\text{Cs}_2\text{CO}_3$  as a base, cyclopropanol **1** (0.050 g, 0.24 mmol, 1.0 equiv.) coupled to 3-bromobenzothiophene (0.077 g, 0.36 mmol, 1.5 equiv.). Purification by flash column chromatography using a 4% solution of EtOAc in hexanes afforded ketone **16a** (0.065 g, 0.19 mmol) as a yellow oil in 81% yield. Using  $\text{K}_3\text{PO}_4$ , ketone **16a** (0.046 g, 0.14 mmol) was prepared in 57% yield.

#### Data for **16a**

$^1\text{H}$  NMR (400 MHz,  $\text{CDCl}_3$ )

$\delta$  7.86 (dd,  $J = 8.0, 2.0$  Hz, 1 H), 7.69 (dd,  $J = 8.0, 2.0$  Hz, 1 H) 7.39-7.35 (m, 4 H),  
7.12 (d,  $J = 8.0$  Hz, 2 H), 7.02 (s, 1 H), 3.69 (s, 2 H), 3.13 (t,  $J = 7.6$  Hz, 2 H),  
2.92 (t,  $J = 7.6$  Hz, 2 H), 1.34 (s, 9 H).

$^{13}\text{C}$  NMR (100 MHz,  $\text{CDCl}_3$ )

$\delta$  207.4, 149.9, 140.4, 138.5, 135.1, 130.8, 128.9, 125.6, 124.1, 123.8, 122.8,  
121.5, 121.4, 49.8, 40.9, 34.3, 31.2, 22.4.

IR Mattson Genesis II FT-IR instrument (thin film, NaCl)

$\nu = 3076, 3021, 2959, 1713, 1542, 1378, 953 \text{ cm}^{-1}$

HRMS EI

Calculated for  $\text{C}_{22}\text{H}_{24}\text{SO}$  [ $\text{M}^+$ ] = 336.1548, found = 336.1561

Rosa and Orellana

### Ketone **17a**

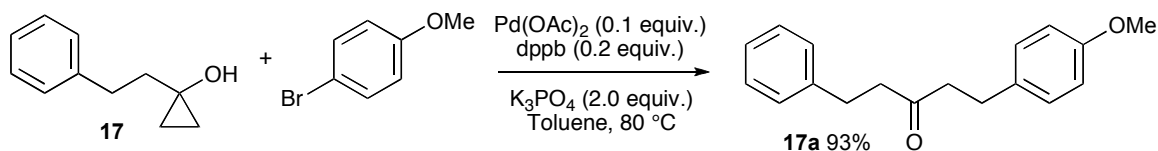

Following *General Procedure 4* cyclopropanol **17** (0.050 g, 0.24 mmol, 1.0 equiv.) was coupled to 4-bromoanisole (0.067 g, 0.36 mmol, 1.5 equiv.). Purification by flash column chromatography using a 10% solution of EtOAc in hexanes afforded ketone **17a** (0.060 g, 0.22 mmol) as a clear oil in 93% yield.

#### Data for **17a**

**<sup>1</sup>H NMR** (400 MHz,  $\text{CDCl}_3$ )

$\delta$  7.31 (t,  $J = 7.6$  Hz, 2 H), 7.22 (t,  $J = 7.6$  Hz, 1 H), 7.19 (d,  $J = 7.6$  Hz, 2 H),  
7.10 (d,  $J = 8.4$  Hz, 2 H), 6.85 (d,  $J = 8.4$  Hz, 2 H), 3.81 (s, 3 H),  
2.91 (t,  $J = 7.6$  Hz, 2 H), 2.86 (t,  $J = 7.6$  Hz, 2 H), 2.73 (t,  $J = 7.6$  Hz, 2 H),  
2.71 (t,  $J = 7.6$  Hz, 2 H).

**<sup>13</sup>C NMR** (100 MHz,  $\text{CDCl}_3$ )

$\delta$  209.2, 157.9, 140.9, 132.9, 129.1, 128.4, 128.2, 126.0, 113.8, 55.2, 44.7, 44.4,  
29.6, 28.8.

**IR** Mattson Genesis II FT-IR instrument (thin film, NaCl)

$\nu = 3061, 3027, 2932, 2835, 1712, 1611, 1512, 1247, 1035, 823, 700 \text{ cm}^{-1}$

**HRMS** EI

Calculated for  $\text{C}_{18}\text{H}_{20}\text{O}_2$  [ $\text{M}^+$ ] = 268.1463, found = 268.1475

Rosa and Orellana

### Ketones **18a** and **18c**

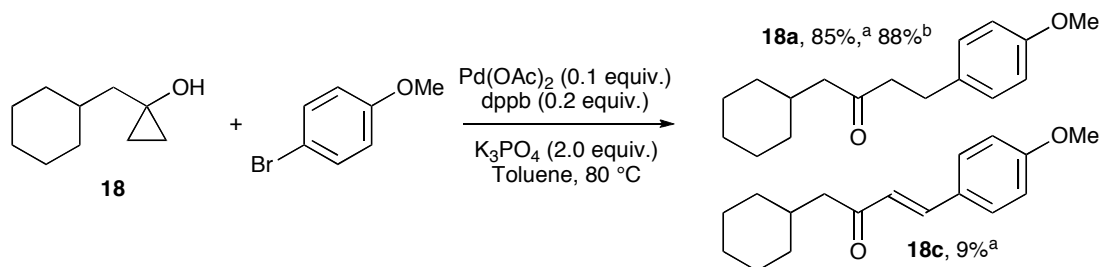

Following *General Procedure 4* and utilizing  $\text{Cs}_2\text{CO}_3$ <sup>b</sup> as a base, cyclopropanol **18** (0.037 g, 0.24 mmol, 1.0 equiv.) was coupled to 4-bromoanisole (0.067 g, 0.36 mmol, 1.5 equiv.). Purification by flash column chromatography using a 10% solution of EtOAc in hexanes afforded the product (0.055 g, 0.21 mmol) as a clear oil in 88% yield. Using  $\text{K}_3\text{PO}_4$ , ketones **18a** (0.053 g, 0.20 mmol) and **18c** (0.006 g, 0.02 mmol) were prepared in 85% and 9% yield respectively.

#### Data for **18a**

<sup>1</sup>H NMR (400 MHz,  $\text{CDCl}_3$ )

$\delta$  7.12 (d,  $J$  = 8.4 Hz, 2 H), 6.84 (d,  $J$  = 8.4 Hz, 2 H), 3.80 (s, 3 H),  
2.85 (t,  $J$  = 7.6 Hz, 2 H), 2.69 (t,  $J$  = 7.6 Hz, 2 H), 2.27 (d,  $J$  = 6.8 Hz, 2 H),  
1.83 (m, 1 H), 1.70-1.61 (m, 5 H), 1.24 (tq,  $J$  = 12.4, 2.8 Hz, 2 H), 1.16 (m, 1 H),  
0.91 (dq,  $J$  = 12.0, 3.2 Hz, 2 H)

<sup>13</sup>C NMR (100 MHz,  $\text{CDCl}_3$ )

$\delta$  210.1, 157.8, 133.1, 129.1, 113.7, 55.2, 50.7, 45.1, 33.8, 33.1, 28.8, 26.1, 26.0.

IR Mattson Genesis II FT-IR instrument (thin film, NaCl)

$\nu$  = 2920, 2851, 1711, 1612, 1513, 1247, 1037, 826  $\text{cm}^{-1}$

HRMS EI

Calculated for  $\text{C}_{17}\text{H}_{24}\text{O}_2$  [ $\text{M}^+$ ] = 260.1776, found = 260.1784

*Rosa and Orellana*

Data for **18c**

<sup>1</sup>H NMR (400 MHz, CDCl<sub>3</sub>)

δ 7.53 (d, *J* = 8.8 Hz, 2 H), 7.52 (d, *J* = 16.0 Hz, 1 H), 6.93 (d, *J* = 8.0 Hz, 2 H),  
6.65 (d, *J* = 16.0 Hz, 1 H), 3.86 (s, 3 H), 2.52 (d, *J* = 6.8 Hz, 2 H), 1.91 (m, 1 H),  
1.77-1.66 (m, 5 H), 1.32 (m, 2 H), 1.19 (m, 1 H), 0.91 (dq, *J* = 12.0, 2.8 Hz, 2 H)

<sup>13</sup>C NMR (100 MHz, CDCl<sub>3</sub>)

δ 200.3, 161.4, 142.1, 129.9, 127.2, 124.5, 114.3, 55.3, 48.5, 34.6, 33.3, 26.2,  
26.1.

IR Mattson Genesis II FT-IR instrument (thin film, NaCl)

$\nu$  = 2921, 2850, 1648, 1602, 1488, 1255, 1027 cm<sup>-1</sup>

m.p. 61 °C

HRMS EI

Calculated for C<sub>17</sub>H<sub>22</sub>O<sub>2</sub> [M<sup>+</sup>] = 258.1620, found = 258.1610

Rosa and Orellana

## Ketones **19a** and **19b**

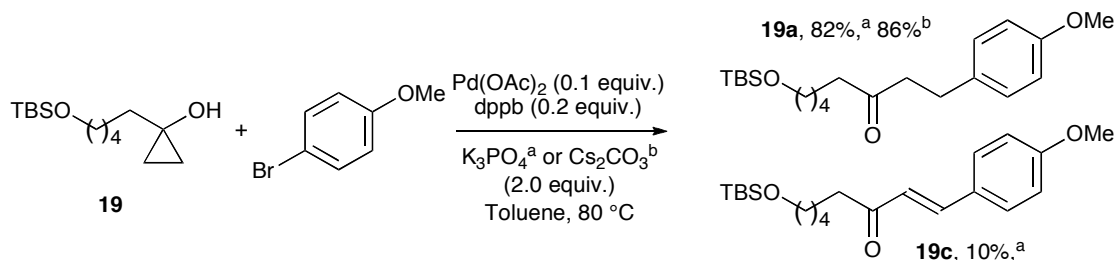

Following *General Procedure 4* and utilizing  $\text{Cs}_2\text{CO}_3$  as a base, cyclopropanol **19** (0.062 g, 0.24 mmol, 1.0 equiv.) was coupled to 4-bromoanisole (0.067 g, 0.36 mmol, 1.5 equiv.). Purification by flash column chromatography using a 5% solution of EtOAc in hexanes afforded ketone **19a** (0.076 g, 0.21 mmol) as a clear oil in 86% yield. Using  $\text{K}_3\text{PO}_4$ , ketones **19a** (0.072 g, 0.20 mmol) and **19c** (0.007 g, 0.02 mmol) were prepared in 82% and 10% yield, respectively.

### Data for **19a**

<sup>1</sup>H NMR (400 MHz,  $\text{CDCl}_3$ )

$\delta$  7.11 (d,  $J$  = 8.4 Hz, 2 H), 6.84 (d,  $J$  = 8.4 Hz, 2 H), 3.80 (s, 3 H),  
3.60 (t,  $J$  = 6.4 Hz, 2 H), 2.85 (t,  $J$  = 7.6 Hz, 2 H), 2.71 (t,  $J$  = 7.6 Hz, 2 H),  
2.40 (t,  $J$  = 7.6 Hz, 2 H), 1.57 (quint,  $J$  = 7.6 Hz, 2 H), 1.52 (quint,  $J$  = 7.6 Hz, 2 H),  
1.31 (quint,  $J$  = 7.6 Hz, 2 H), 0.91 (s, 9 H), 0.06 (s, 6 H).

<sup>13</sup>C NMR (100 MHz,  $\text{CDCl}_3$ )

$\delta$  210.3, 157.8, 133.1, 129.1, 113.8, 62.9, 55.1, 44.4, 42.9, 32.5, 28.8, 25.9, 25.4,  
23.5, 18.2, -5.4.

IR Mattson Genesis II FT-IR instrument (thin film, NaCl)

$\nu$  = 2926, 2873, 1711, 1604, 1363, 1251, 1102, 1007, 776  $\text{cm}^{-1}$

HRMS ESI

Calculated for  $\text{C}_{21}\text{H}_{37}\text{O}_3\text{Si}$   $[\text{M}+\text{H}^+] = 365.2507$ , found = 365.2507



*Rosa and Orellana*

**Data for 19c**

**<sup>1</sup>H NMR** (400 MHz, CDCl<sub>3</sub>)

δ 7.54 (d, *J* = 16.0 Hz, 1 H), 7.53 (d, *J* = 8.4 Hz, 2 H), 6.94 (d, *J* = 8.4 Hz, 2 H),  
6.65 (d, *J* = 16.0 Hz, 1 H), 3.87 (s, 3 H), 3.64 (t, *J* = 6.4 Hz, 2 H),  
2.67 (t, *J* = 7.6 Hz, 2 H), 1.71 (quint, *J* = 7.6 Hz, 2 H), 1.56 (m, 3 H), 1.31 (m, 2  
H), 0.91 (s, 9 H), 0.07 (s, 6 H).

**<sup>13</sup>C NMR** (100 MHz, CDCl<sub>3</sub>)

δ 200.4, 161.4, 142.0, 129.8, 127.1, 124.0, 114.3, 62.9, 55.3, 40.7, 32.6, 25.9,  
25.5, 24.2, 18.3, -5.4.

**IR** Mattson Genesis II FT-IR instrument (thin film, NaCl)

$\nu$  = 2942, 1673, 1624, 1422, 1251, 1083, 1034, 842 cm<sup>-1</sup>

**HRMS** ESI

Calculated for C<sub>21</sub>H<sub>35</sub>O<sub>3</sub>Si [M+H<sup>+</sup>] = 363.2350, found = 363.2351

Rosa and Orellana

### Ketones **20a** and **20c**

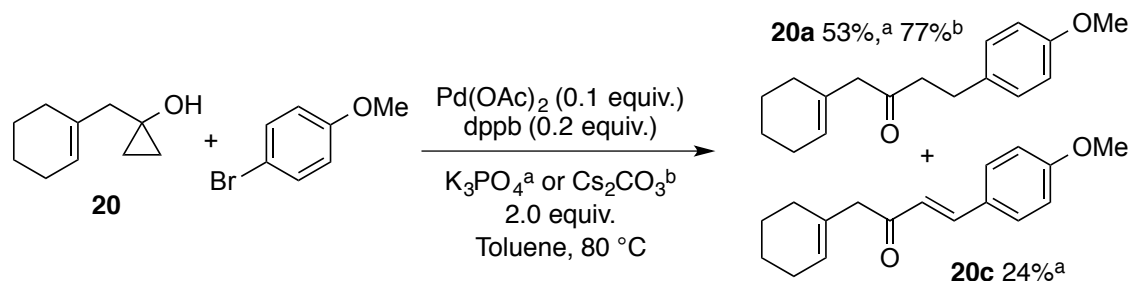

Following *General Procedure 4* and utilizing  $\text{Cs}_2\text{CO}_3$  as a base, cyclopropanol **20** (0.037 g, 0.24 mmol, 1.0 equiv.) was coupled to 4-bromoanisole (0.067 g, 0.36 mmol, 1.5 equiv.). Purification by flash column chromatography using a 5% solution of EtOAc in hexanes afforded ketone **20a** (0.048 g, 0.19 mmol) as a clear oil in 77% yield. Using  $\text{K}_3\text{PO}_4$ , ketones **20a** (0.033 g, 0.13 mmol) and **20c** (0.015 g, 0.06 mmol) were prepared in 53% and 24% yield, respectively.

#### Data for **20a**

<sup>1</sup>H NMR (400 MHz,  $\text{CDCl}_3$ )

$\delta$  7.11 (d,  $J = 8.4$  Hz, 2 H), 6.84 (d,  $J = 8.4$  Hz, 2 H), 5.53 (bs, 1 H), 3.80 (s, 3 H), 2.99 (s, 2 H), 2.84 (t,  $J = 7.2$  Hz, 2 H), 2.74 (t,  $J = 7.2$  Hz, 2 H), 2.03 (m, 2 H), 1.87 (m, 2 H), 1.57 (m, 4 H).

<sup>13</sup>C NMR (100 MHz,  $\text{CDCl}_3$ )

$\delta$  208.3, 157.8, 133.1, 131.5, 129.2, 126.2, 113.7, 55.2, 52.7, 43.3, 28.8, 28.5, 25.3, 22.6, 21.8.

IR Mattson Genesis II FT-IR instrument (thin film, NaCl)

$\nu = 3021, 2928, 2835, 1712, 1612, 1246, 1036, 824 \text{ cm}^{-1}$

HRMS EI

Calculated for  $\text{C}_{17}\text{H}_{22}\text{O}_2$  [ $\text{M}^+$ ] = 258.1620, found = 258.1631

*Rosa and Orellana*

Data for **20c**

<sup>1</sup>H NMR (400 MHz, CDCl<sub>3</sub>)

δ 7.58 (d, *J* = 16.0 Hz, 1 H), 7.52 (d, *J* = 8.4 Hz, 2 H), 6.93 (d, *J* = 8.4 Hz, 2 H), 6.71 (d, *J* = 16.0 Hz, 1 H), 5.64 (bs, 1 H), 3.86 (s, 3 H), 3.24 (s, 2 H), 2.07 (m, 2 H), 1.99 (m, 2 H), 1.68-1.57 (m, 4 H).

<sup>13</sup>C NMR (100 MHz, CDCl<sub>3</sub>)

δ 198.6, 161.4, 142.4, 132.1, 129.9, 127.2, 126.0, 123.0, 114.3, 55.3, 50.8, 28.6, 25.4, 22.7, 21.9.

IR Mattson Genesis II FT-IR instrument (thin film, NaCl)

ν = 2930, 2837, 1682, 1661, 1599, 1254, 1030 cm<sup>-1</sup>

m.p. 74 °C

HRMS EI

Calculated for C<sub>17</sub>H<sub>20</sub>O<sub>2</sub> [M<sup>+</sup>] = 256.1463, found = 256.1474

Rosa and Orellana

### Ketone **21a**

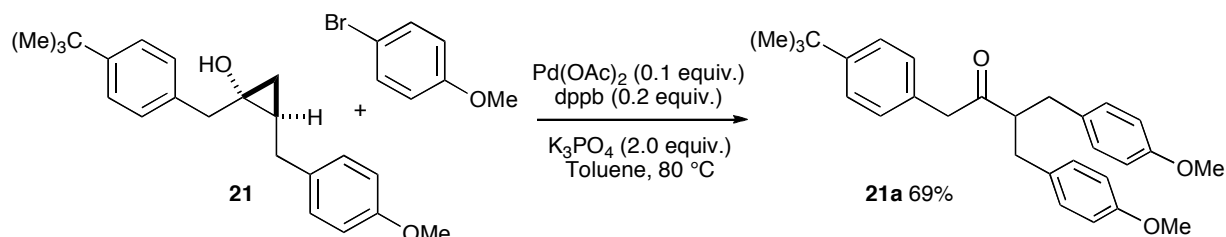

Following *General Procedure 4*, cyclopropanol **21** (0.078 g, 0.24 mmol, 1.0 equiv.) was coupled to 4-bromoanisole (0.067 g, 0.36 mmol, 1.5 equiv.). Purification by flash column chromatography using a 5% solution of EtOAc in hexanes afforded ketone **21a** (0.071 g, 0.16 mmol) as a clear oil in 69% yield.

#### Data for **21a**

$^1\text{H}$  NMR (400 MHz,  $\text{CDCl}_3$ )

$\delta$  7.25 (d,  $J$  = 8.0 Hz, 2 H), 7.10 (d,  $J$  = 8.4 Hz, 4 H), 6.83 (d,  $J$  = 8.4 Hz, 4 H), 6.75 (d,  $J$  = 8.0 Hz, 2 H), 3.82 (s, 6 H), 3.17 (m, 1 H), 3.15 (s, 2 H), 2.85 (dd,  $J$  = 13.6, 9.2 Hz, 2 H), 2.68 (dd,  $J$  = 13.6, 6.0 Hz, 2 H), 1.33 (s, 9 H).

$^{13}\text{C}$  NMR (100 MHz,  $\text{CDCl}_3$ )

$\delta$  211.7, 158.0, 149.4, 131.3, 130.3, 129.8, 129.2, 125.2, 113.8, 55.1, 51.7, 37.7, 34.3, 31.2, 31.2.

IR Mattson Genesis II FT-IR instrument (thin film, NaCl)

$\nu$  = 3021, 2972, 2835, 1713, 1248, 1037, 836  $\text{cm}^{-1}$

HRMS EI

Calculated for  $\text{C}_{29}\text{H}_{34}\text{O}_3$  [ $\text{M}^+$ ] = 430.2508, found = 430.2493

Rosa and Orellana

## Ketone **22a**

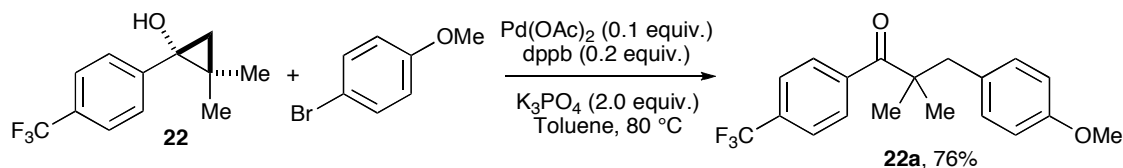

Following *General Procedure 4*, cyclopropanol **22** (0.055 g, 0.24 mmol, 1.0 equiv.) was coupled to 4-bromoanisole (0.067 g, 0.36 mmol, 1.5 equiv.). Purification by flash column chromatography using a 3% solution of EtOAc in hexanes afforded ketone **22a** (0.061 g, 0.18 mmol) as a clear oil in 76% yield.

### Data for **22a**

$^1\text{H}$  NMR (400 MHz,  $\text{CDCl}_3$ )

$\delta$  7.64 (d,  $J = 8.0$  Hz, 2 H), 7.49 (d,  $J = 8.0$  Hz, 2 H), 7.03 (d,  $J = 8.0$  Hz, 2 H),  
6.83 (d,  $J = 8.0$  Hz, 2 H), 3.81 (s, 3 H), 3.01 (s, 2 H), 1.30 (s, 6 H).

$^{13}\text{C}$  NMR (100 MHz,  $\text{CDCl}_3$ )

$\delta$  209.5, 158.2, 142.9, 131.9 (q,  $^2J_{\text{C-F}} = 32.0$  Hz), 131.3, 130.1, 127.2,  
125.0 (q,  $^3J_{\text{C-F}} = 4.0$  Hz), 123.6 (q,  $^1J_{\text{C-F}} = 271.0.0$  Hz), 113.4, 55.1, 50.0, 45.2,  
25.8.

$^{19}\text{F}$  NMR (376 MHz,  $\text{CDCl}_3$ )

−62.9

IR Mattson Genesis II FT-IR instrument (thin film, NaCl)

$\nu = 3015, 2983, 2869, 1711, 1601, 1433, 1138, 780 \text{ cm}^{-1}$

HRMS EI

Calculated for  $\text{C}_{19}\text{H}_{19}\text{F}_3\text{O}_2$  [ $\text{M}^+$ ] = 336.1337, found = 336.1349

Rosa and Orellana

### Ketones **23a** and **23d**

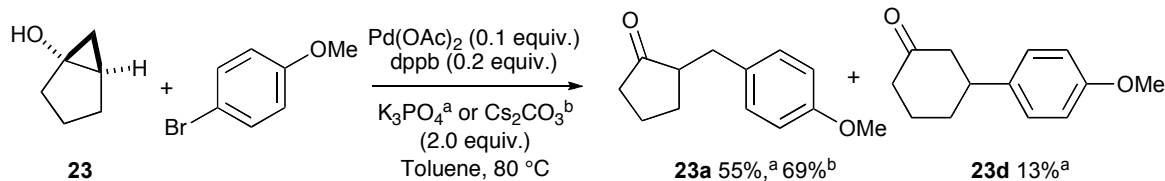

Following *General Procedure 4* and utilizing  $\text{Cs}_2\text{CO}_3$  as a base, cyclopropanol **23** (0.024 g, 0.24 mmol, 1.0 equiv.) was coupled to 4-bromoanisole (0.067 g, 0.36 mmol, 1.5 equiv.). Purification by flash column chromatography using an 8% solution of EtOAc in hexanes afforded ketone **23a** (0.034 g, 0.17 mmol) as a clear oil in 69% yield. Using  $\text{K}_3\text{PO}_4$ , ketones **23a** (0.027 g, 0.13 mmol) and **23d** (0.006 g, 0.03 mmol) were prepared in 55% and 13 % yield, respectively.

Spectral data for **23a** is consistent with those reported by Ricankova and co-workers.<sup>4</sup> Spectral data for **23d** is consistent with those reported by Yu and co-workers.<sup>v</sup>

### Ketones **24a** and **24d**

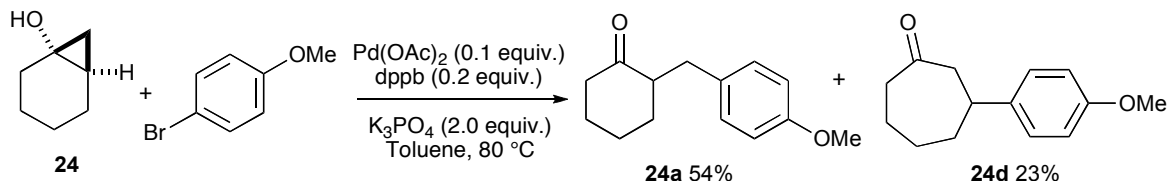

Following *General Procedure* – and utilizing  $\text{K}_3\text{PO}_4$  as a base, cyclohexanol **24** (0.027 g, 0.24 mmol, 1.0 equiv.) was coupled to 4-bromoanisole (0.067 g, 0.36 mmol, 1.5 equiv.). Purification by flash column chromatography using a 13% solution of EtOAc in hexanes afforded ketone **24a** (0.028 g, 0.13 mmol) as a clear oil in 54% yield along with the corresponding ring-expanded ketone **24d** (0.012 g, 0.05 mmol) in 23% yield.

Spectral data for **24a** is consistent with those reported by Bolm and co-workers.<sup>vi</sup> Spectral data for **24d** is consistent with those reported by Minnaard and co-workers.<sup>vii</sup>

Rosa and Orellana

## Ketones **25a** and **25c**

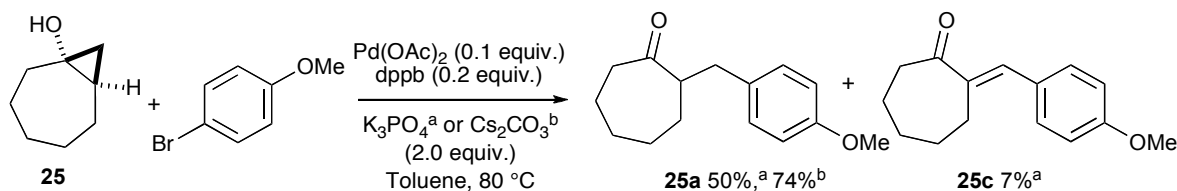

Following *General Procedure 4* and utilizing  $\text{Cs}_2\text{CO}_3$  as a base, cyclopropanol **25** (0.030 g, 0.24 mmol, 1.0 equiv.) was coupled to 4-bromoanisole (0.067 g, 0.36 mmol, 1.5 equiv.). Purification by flash column chromatography using a 7% solution of EtOAc in hexanes afforded ketone **25a** (0.041 g, 0.18 mmol) as a clear oil in 74% yield. Using  $\text{K}_3\text{PO}_4$ , ketones **25a** (0.028 g, 0.12 mmol) and **25c** (0.013 g, 0.06 mmol) were prepared in 50% and 23 % yield, respectively.

Spectral data for **25a** is consistent with those reported by Ricankova and co-workers.<sup>viii</sup> Spectral data for **25c** is consistent with those reported by Zhang and co-workers.<sup>ix</sup>

<sup>i</sup> Still, W.C.; Kahn, M.; Mitra, A. *J. Org. Chem.* **1978**, *43*, 2923 – 2925.

<sup>ii</sup> Lee, J.; Kim, Heejin; Cha, J. K. *J. Am. Chem. Soc.* **1996**, *118*, 4198 – 4199.

<sup>iii</sup> Iwasawa, N.; Hayakawa, S.; Funahashi, M.; Isobe, K.; Narasaka, K. *Bull. Chem. Soc. Jpn.* **1996**, *66*, 819 – 827.

<sup>iv</sup> Murai, S.; Aya, T.; Sonoda, N. *J. Org. Chem.* **1973**, *38*, 4354 – 4356.

<sup>v</sup> Li, Q.; Dong, Z.; Yu, Z.-X. *Org. Lett.*, **2011**, *13*, 1122 – 1125.

<sup>vi</sup> Lu, S.-M.; Bolm, C. *Angew. Chem. Int. Ed.* **2008**, *47*, 8920 – 8923.

<sup>vii</sup> Gottumukkala, A.; Devries, J.; Minnaard, A. *Chem. Eur. J.*, **2011**, *17*, 3091 – 3095.

<sup>viii</sup> Rejzek, M.; Wimmer, Z.; Saman, D.; Ricankova, M. *Helv. Chim. Acta.* **1994**, *77*, 1241-1255.

<sup>ix</sup> Tian, F.; Yao, D.; Liu, Y.; Xie, F.; Zhang, W. *Adv. Syn. and Cat.* **2010**, *352*, 1841 – 1845.

Rosa and Orellana

**$^1\text{H}$ - and  $^{13}\text{C}$ -NMR data for cyclopropanol 1**

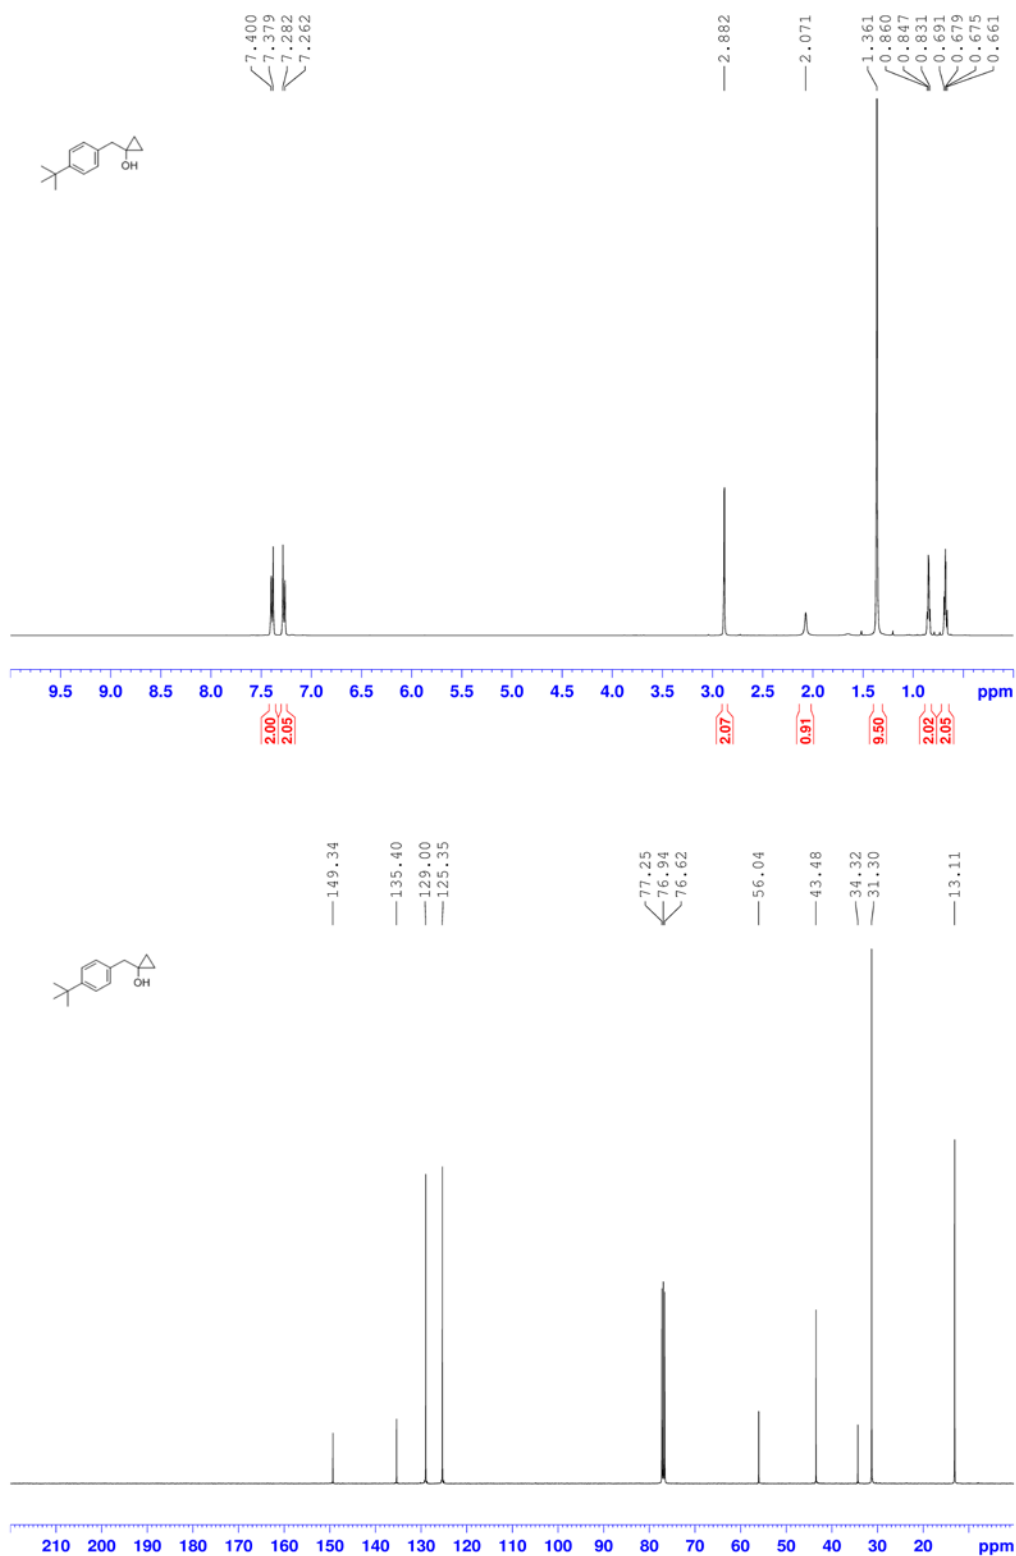



Rosa and Orellana

**$^1\text{H}$ - and  $^{13}\text{C}$ -NMR data for cyclopropanol 17**

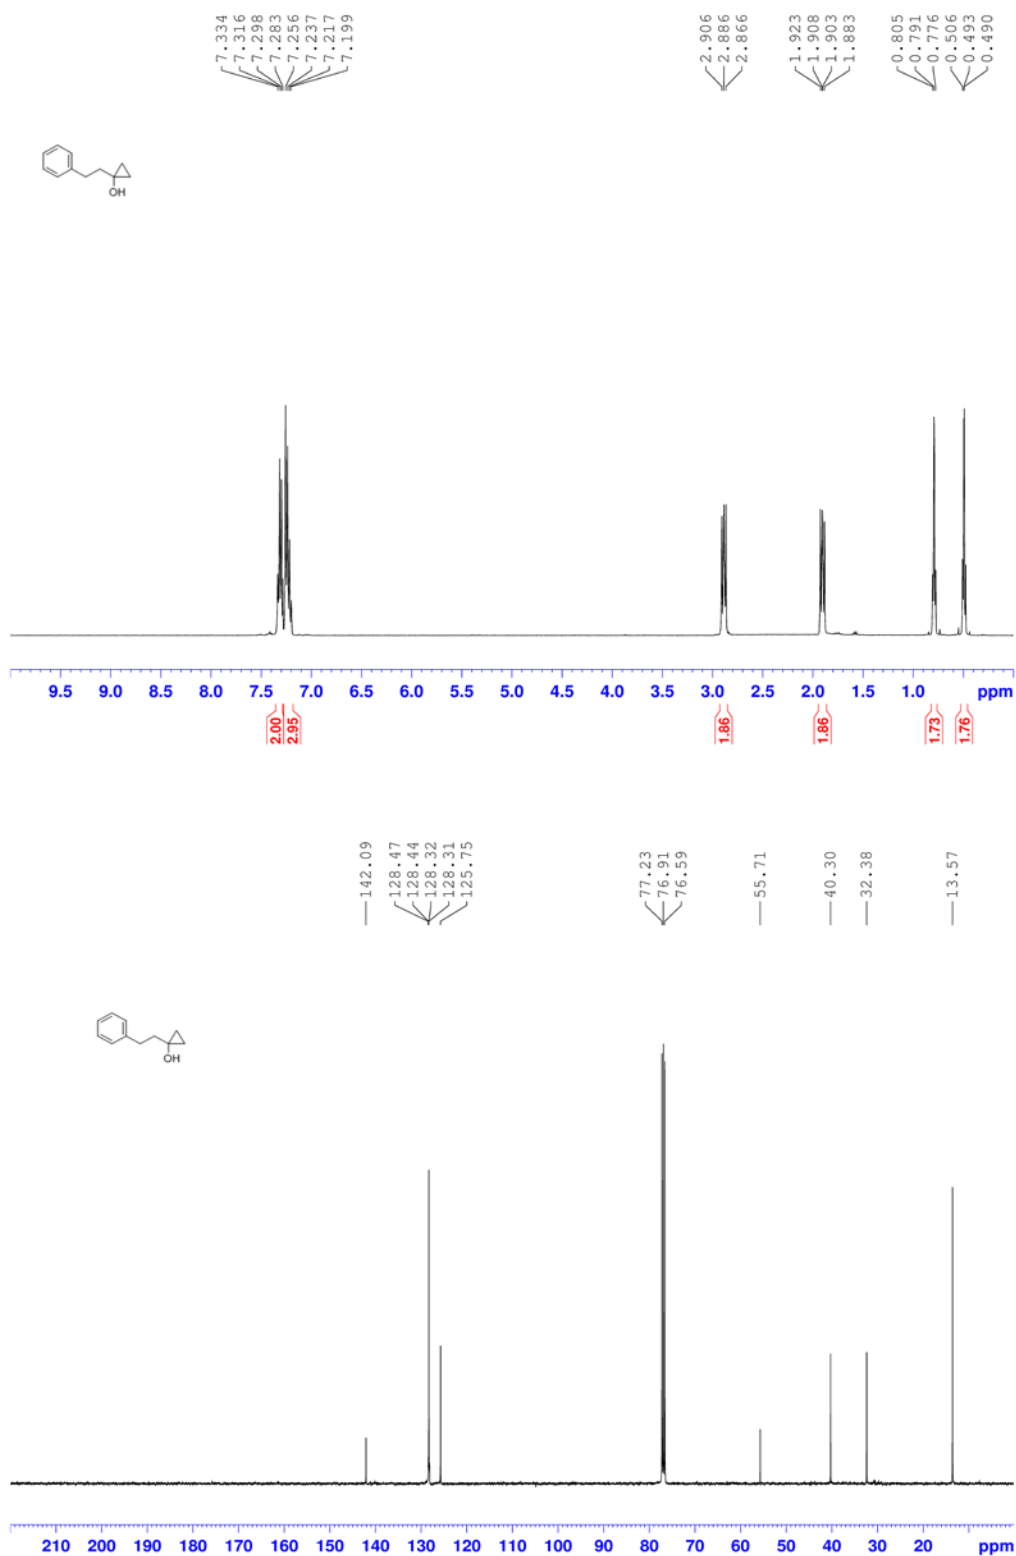

Rosa and Orellana

<sup>1</sup>H- and <sup>13</sup>C-NMR data for cyclopropanol 18

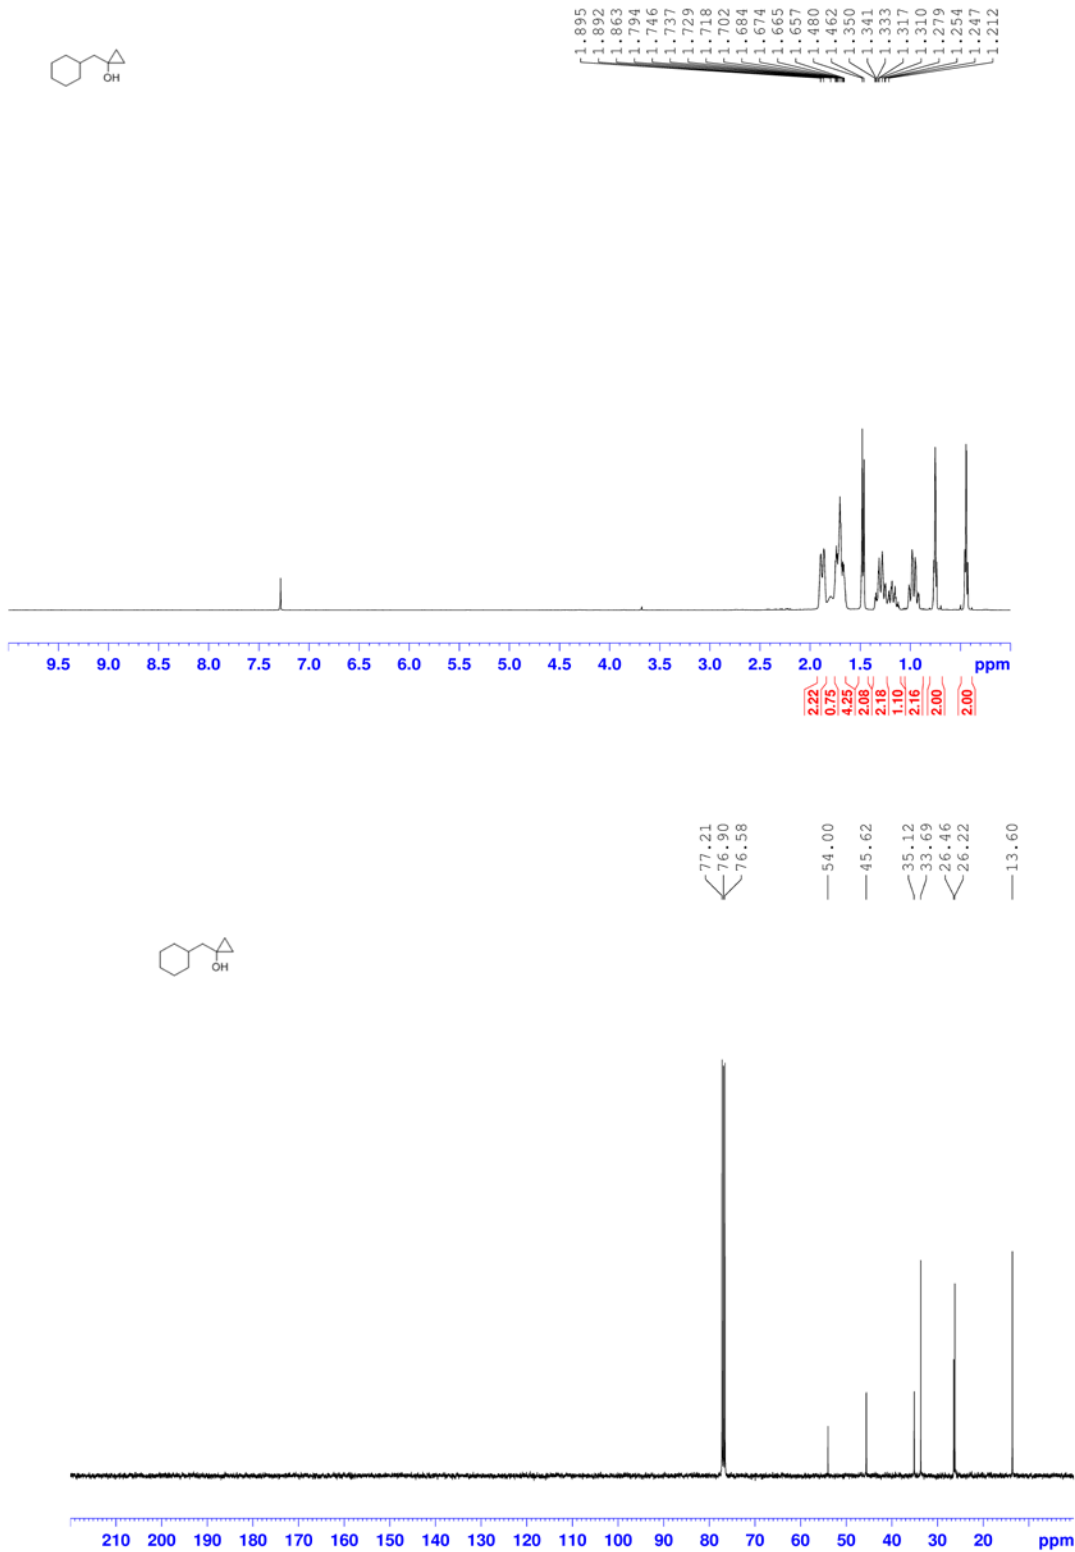

Rosa and Orellana

**<sup>1</sup>H- and <sup>13</sup>C- NMR data for cyclopropanol 19**

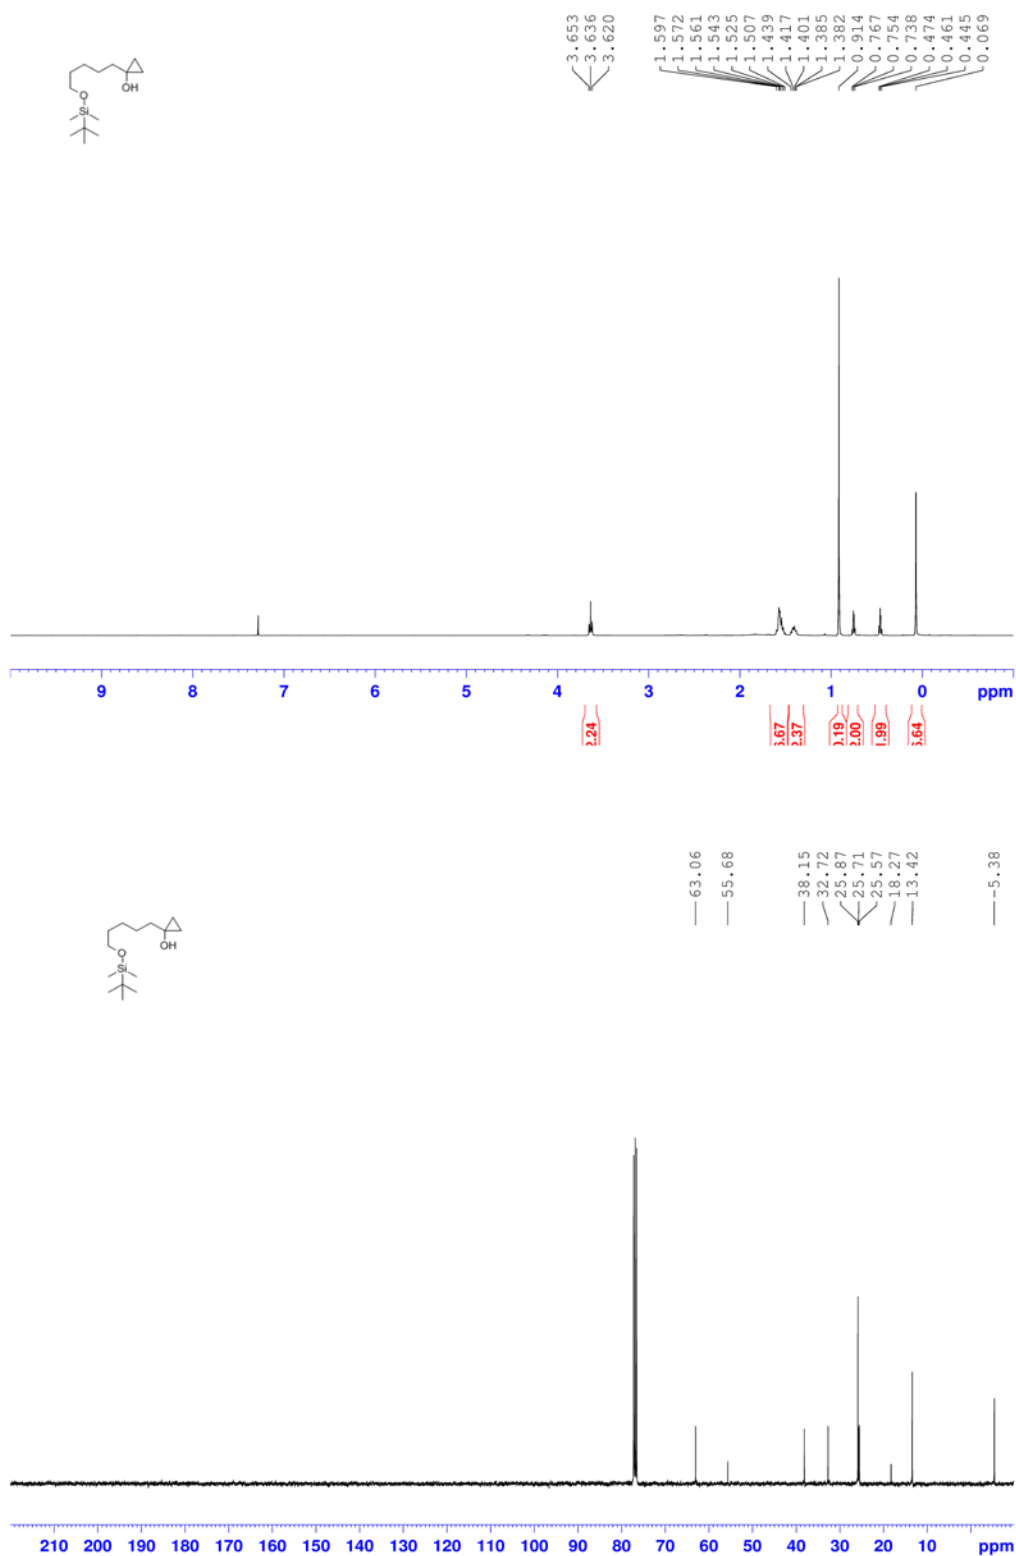

Rosa and Orellana

**$^1\text{H}$ - and  $^{13}\text{C}$ -NMR data for cyclopropanol 20**

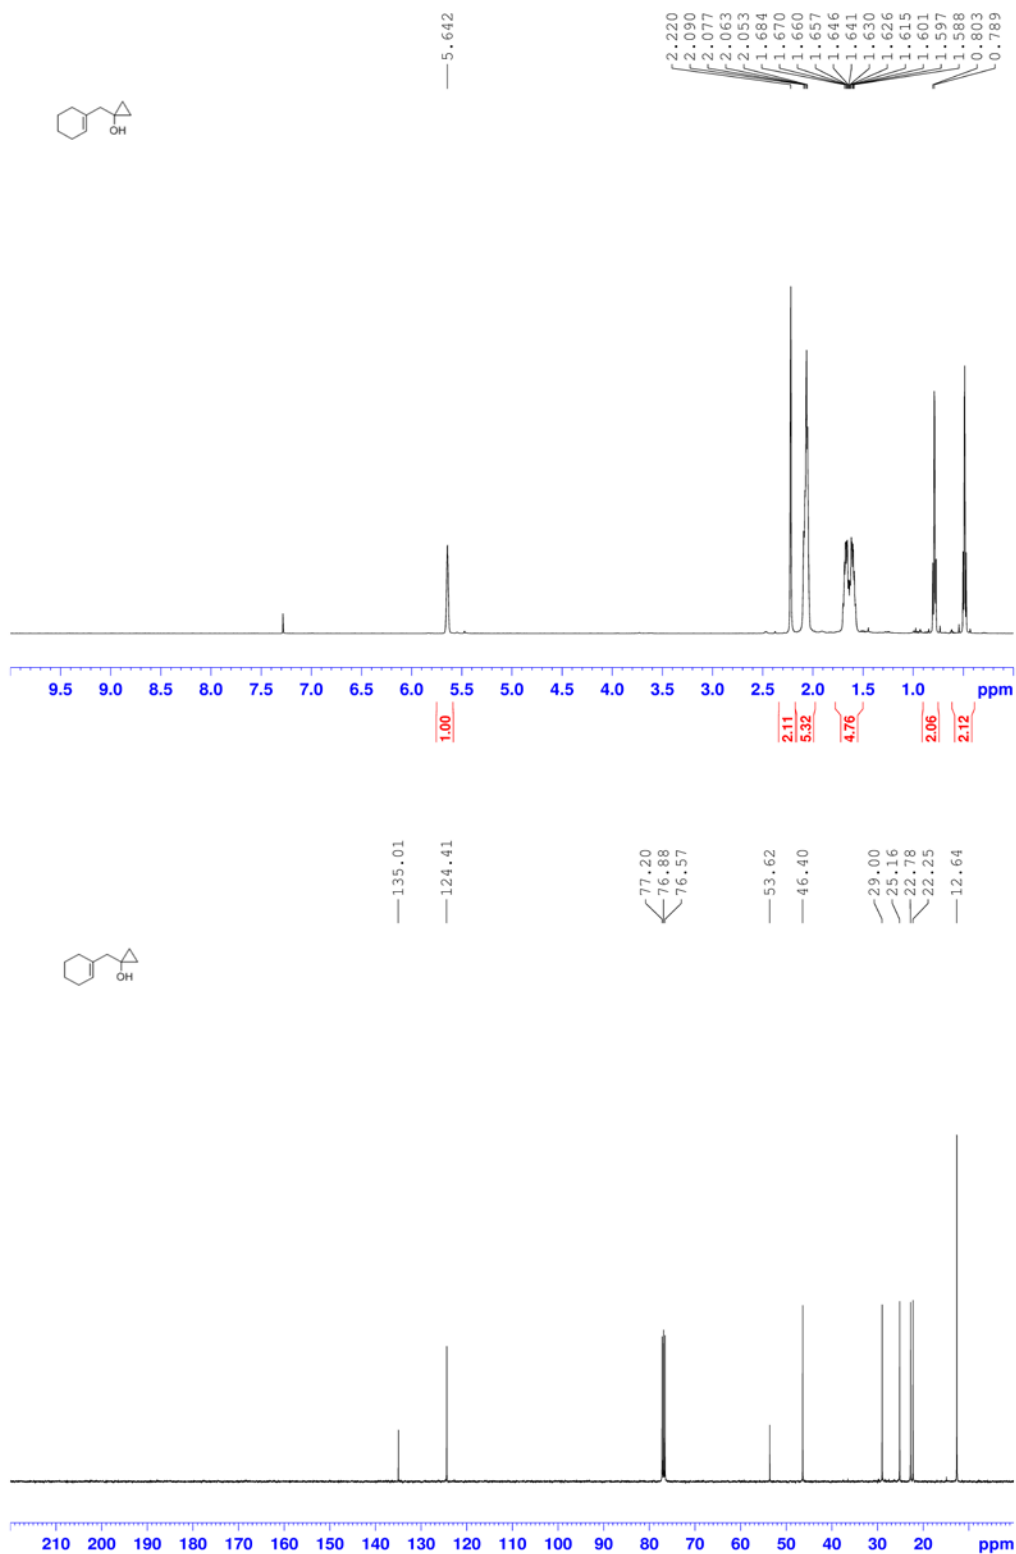

Rosa and Orellana

**$^1\text{H}$ - and  $^{13}\text{C}$ -NMR data for cyclopropanol 21**

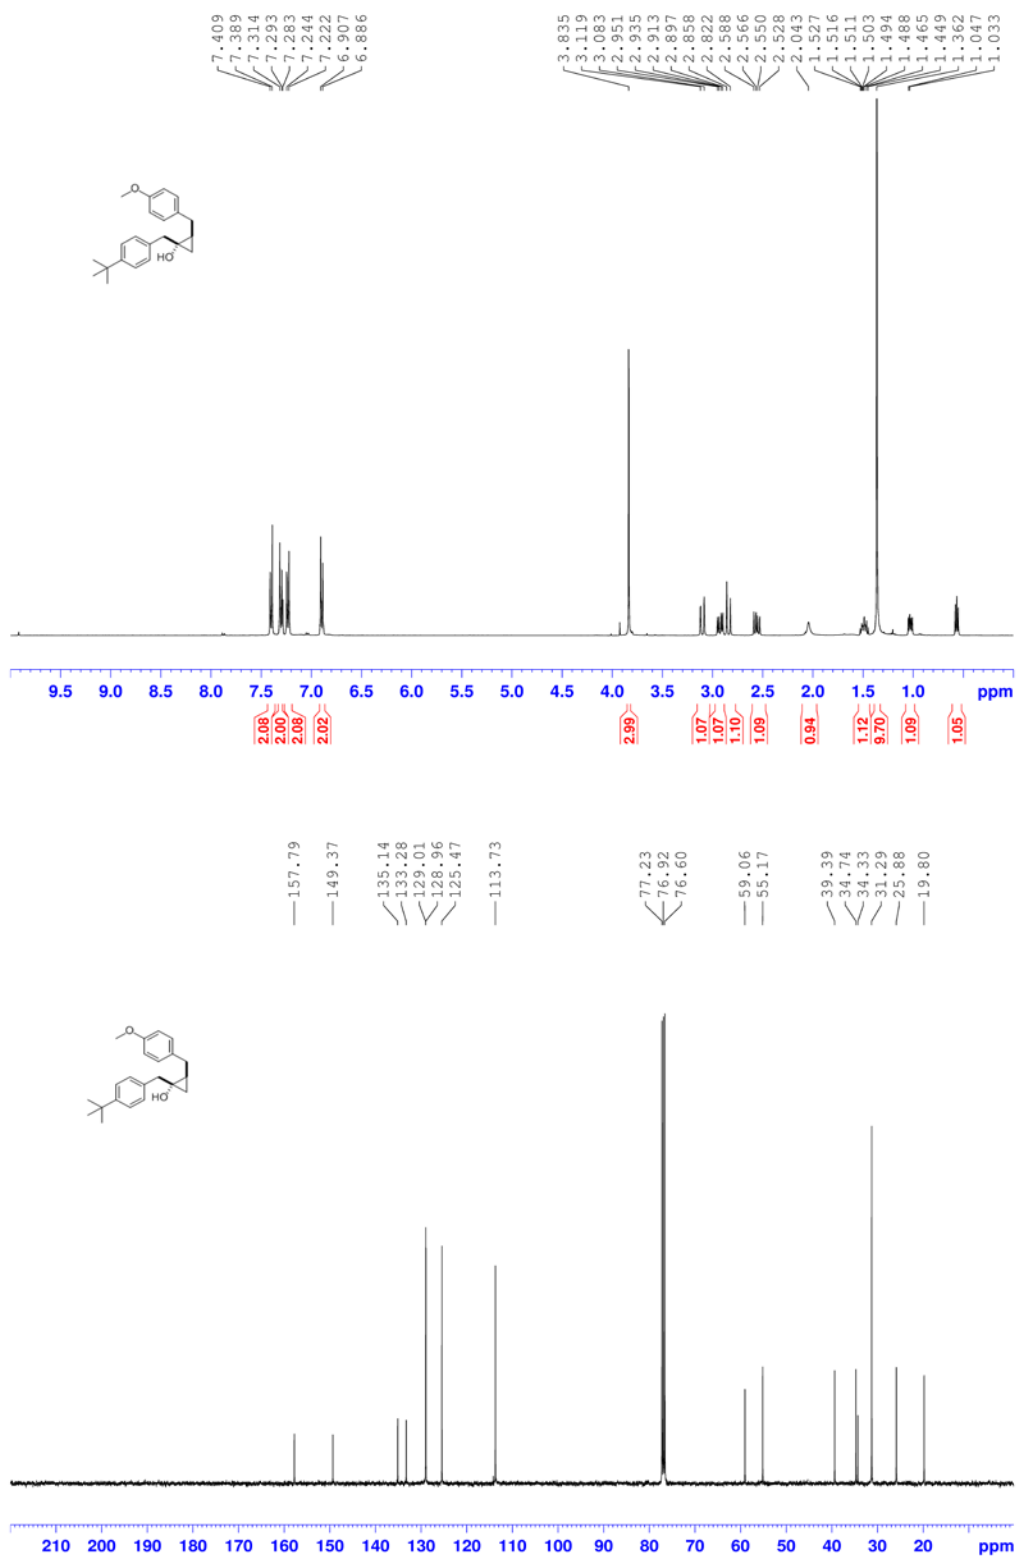

Rosa and Orellana

<sup>1</sup>H- and <sup>13</sup>C-NMR data for cyclopropanol 22

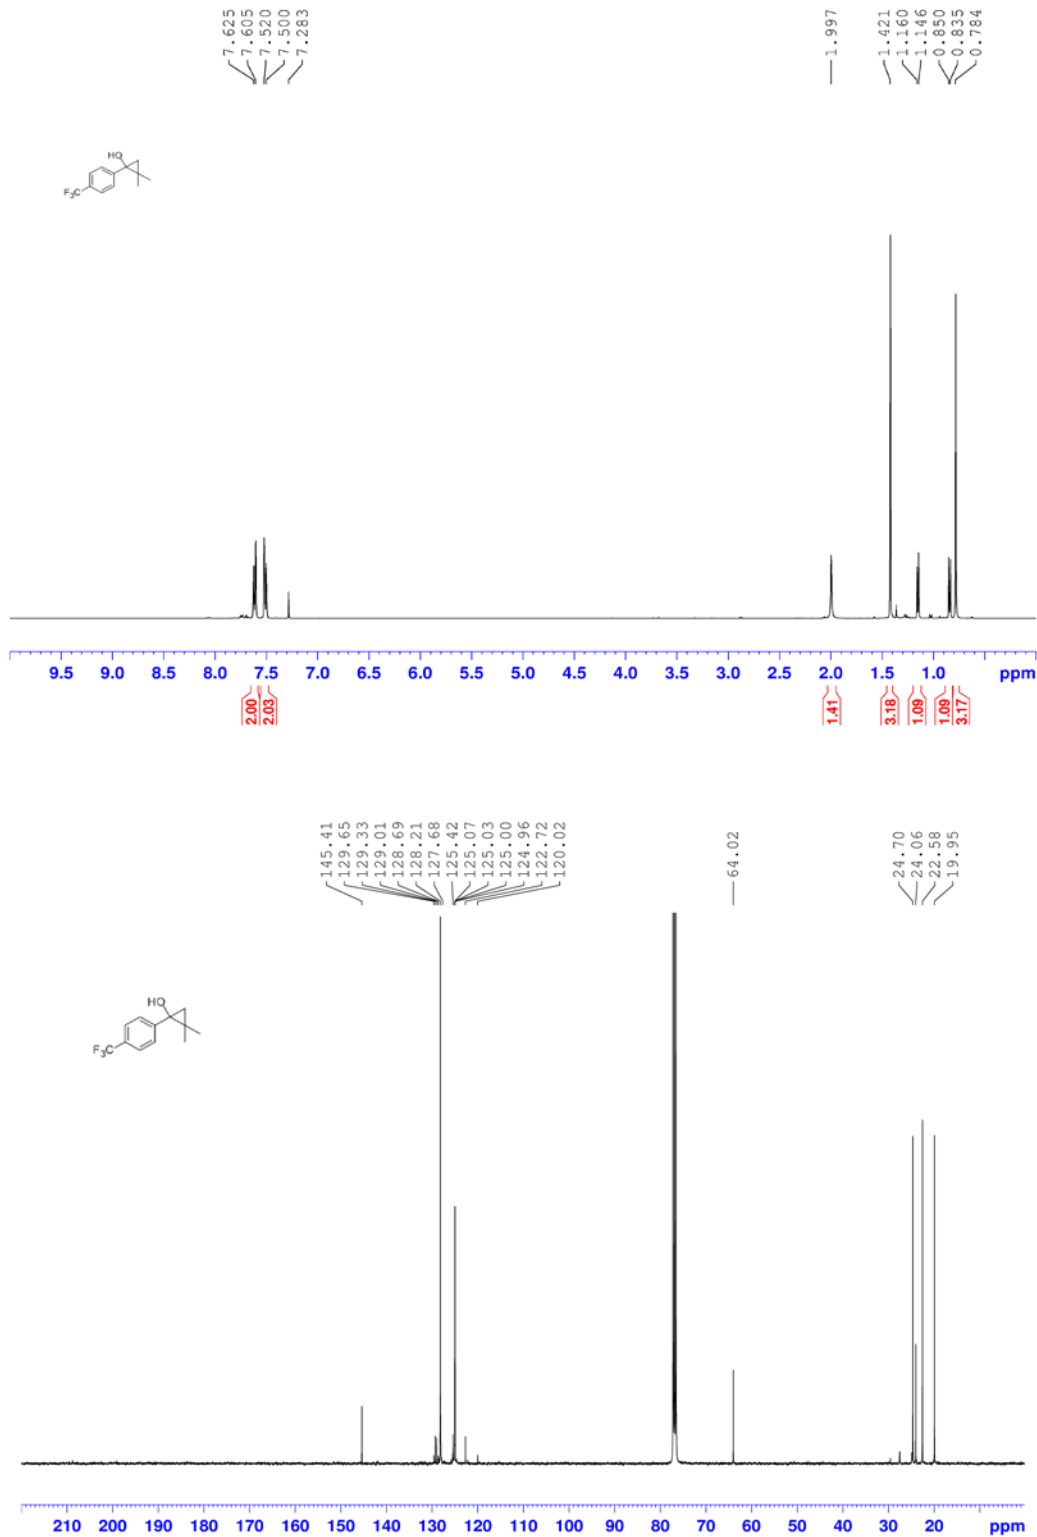

Rosa and Orellana

**$^1\text{H}$ - and  $^{13}\text{C}$ -NMR data for ketone 1a**

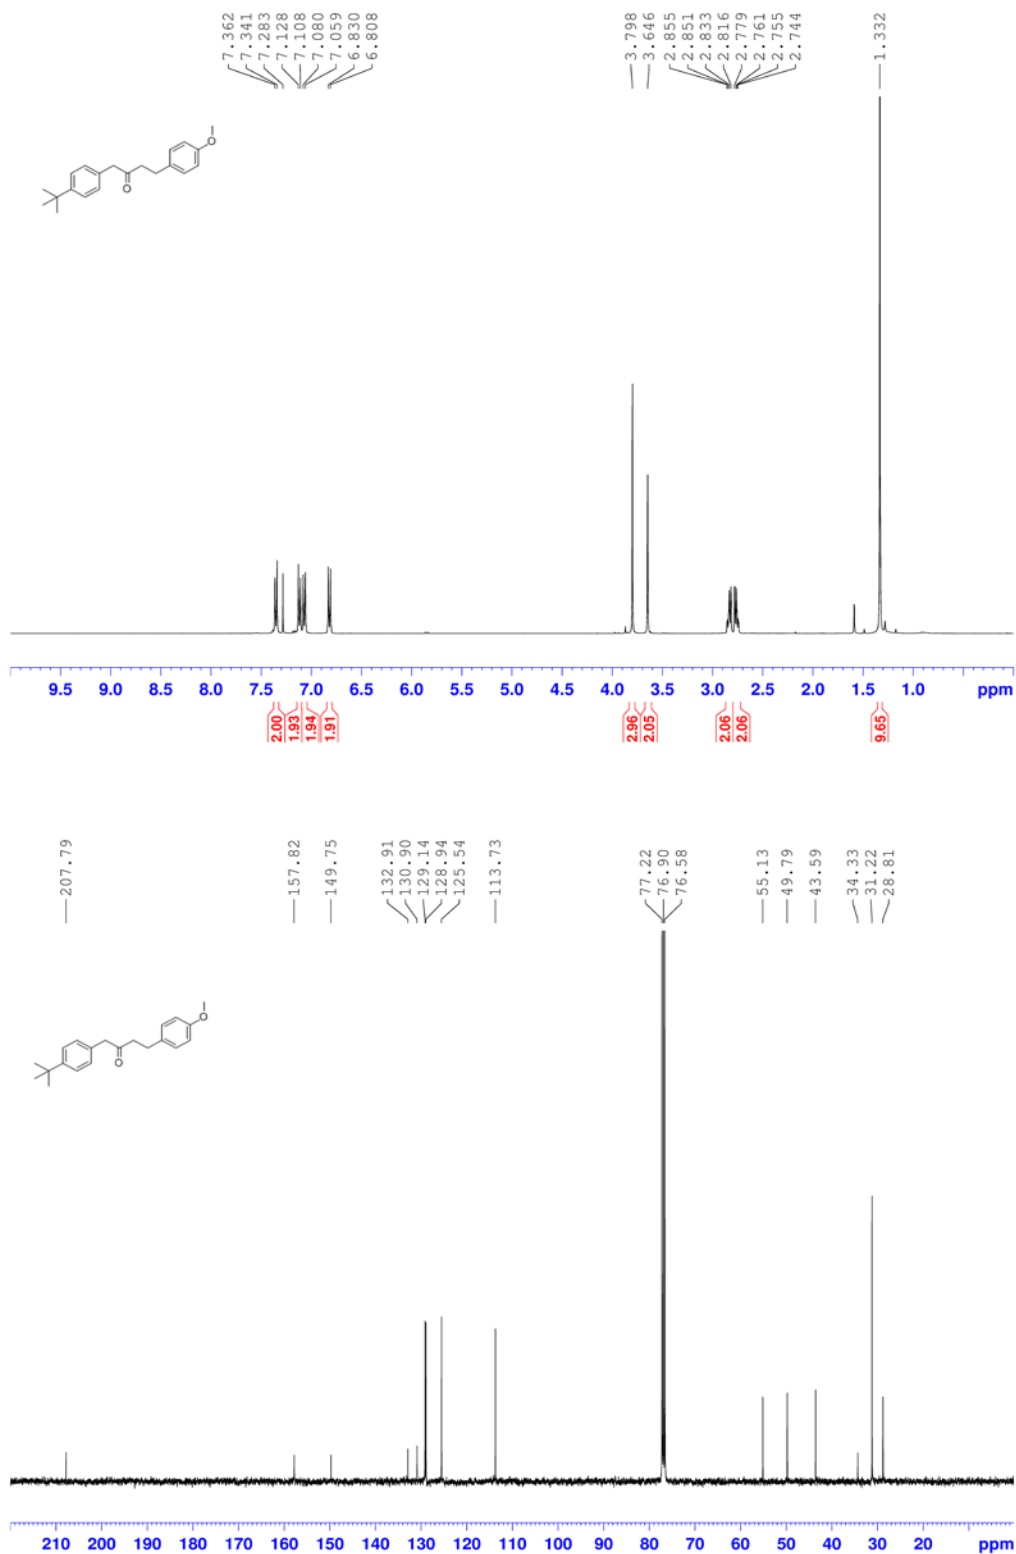

Rosa and Orellana

**<sup>1</sup>H- and <sup>13</sup>C-NMR data for ketone 2a**

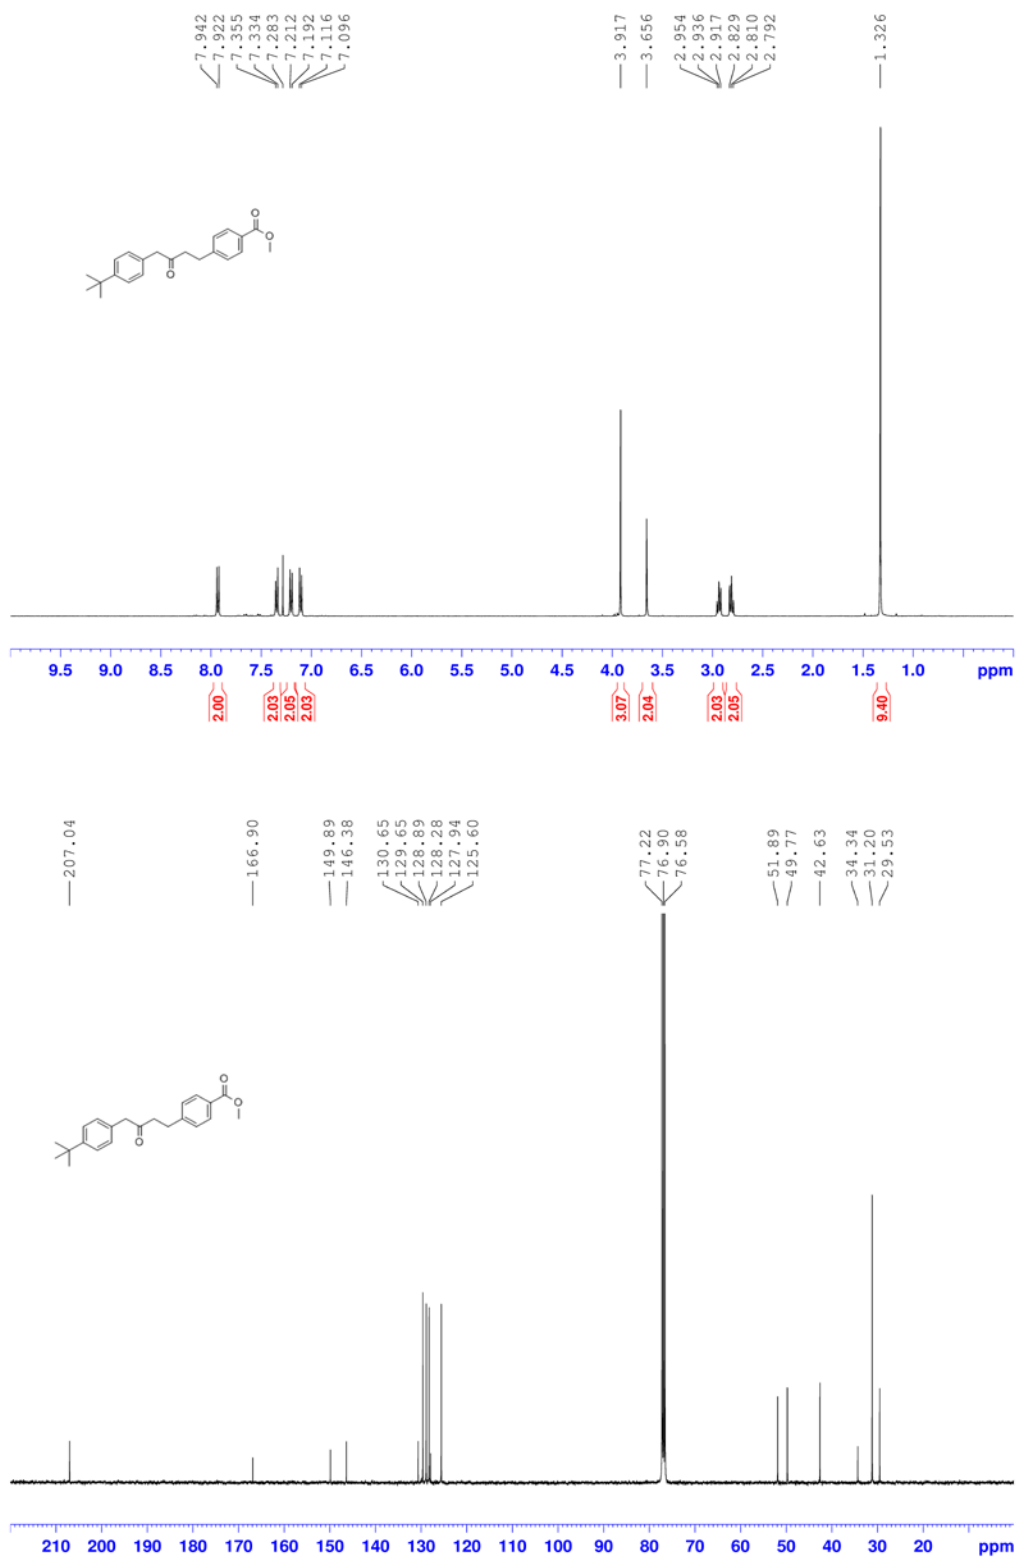



Rosa and Orellana

**$^1\text{H}$ - and  $^{13}\text{C}$ -NMR data for ketone 3a**

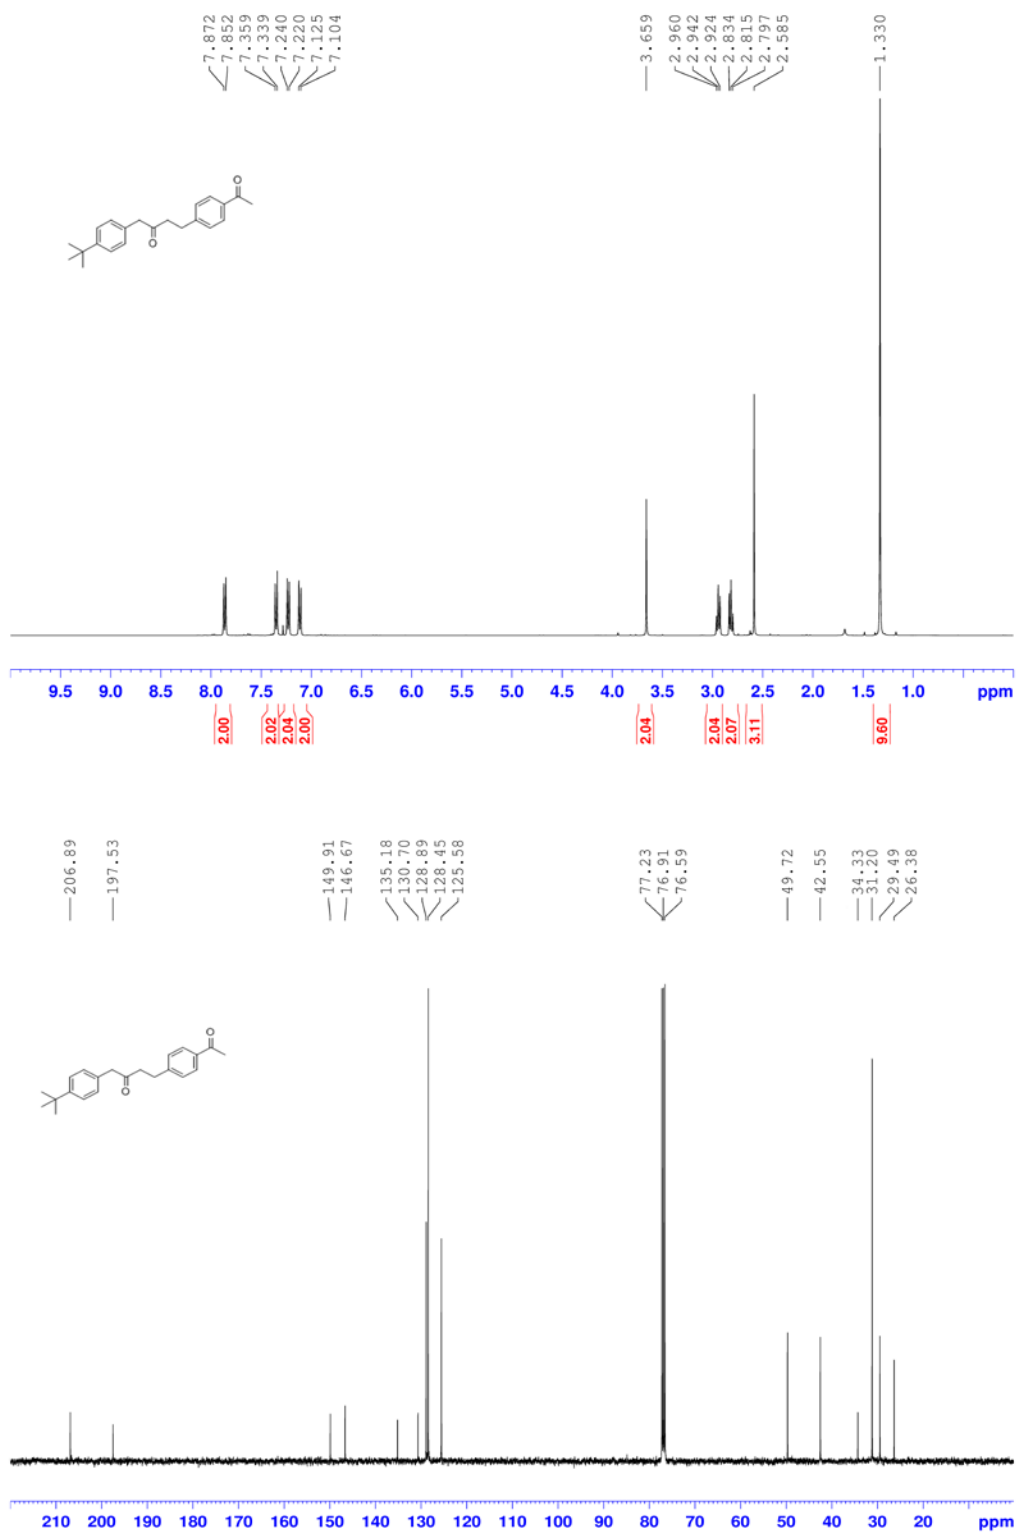

Rosa and Orellana

**$^1\text{H}$  and  $^{13}\text{C}$  NMR data for  $\alpha$ ,  $\beta$ -unsaturated ketone 3c**

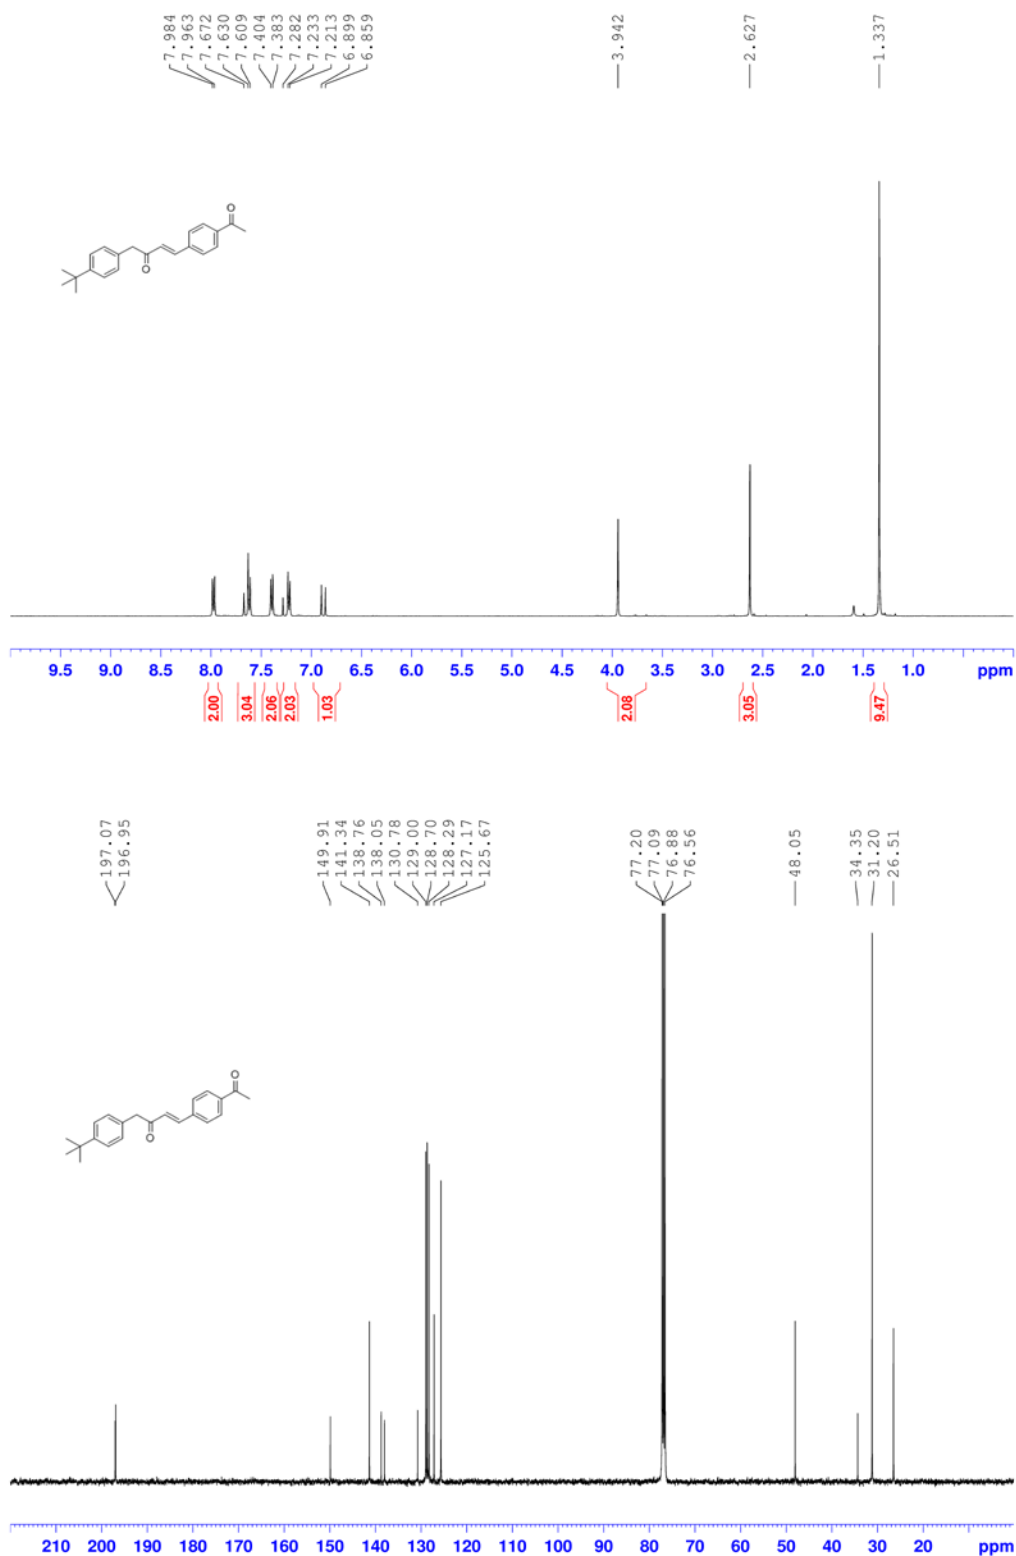

Rosa and Orellana

**$^1\text{H}$  and  $^{13}\text{C}$  NMR data for ketone 4a**

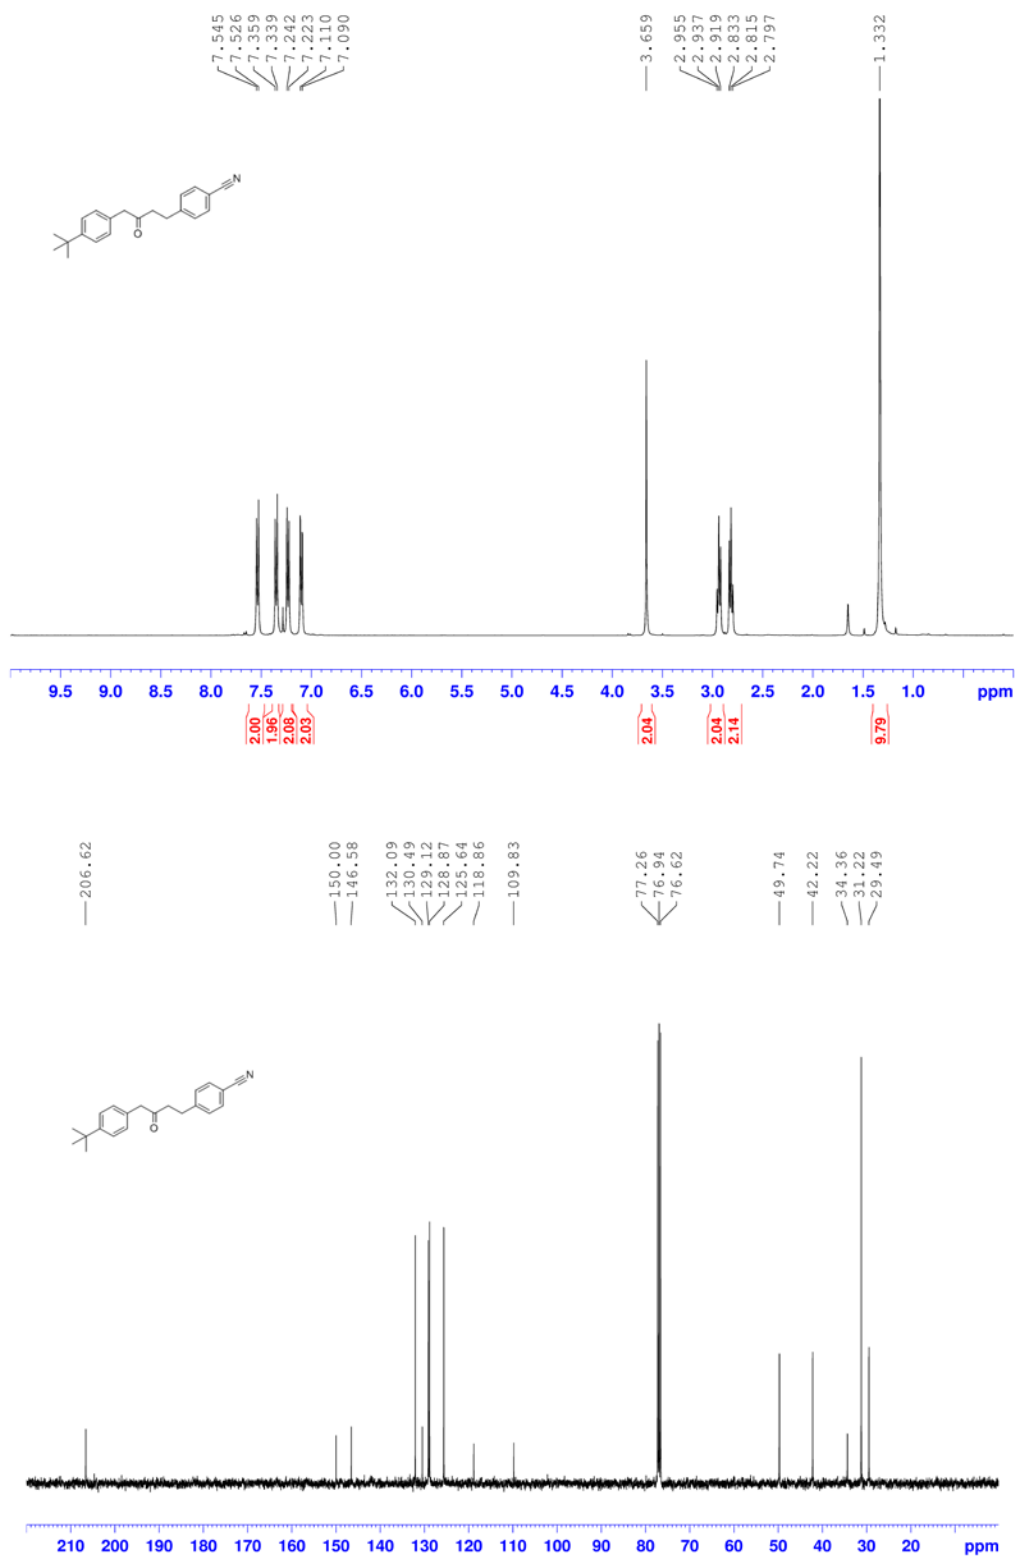

Rosa and Orellana

**<sup>1</sup>H- and <sup>13</sup>C-NMR data for ketone 5a**

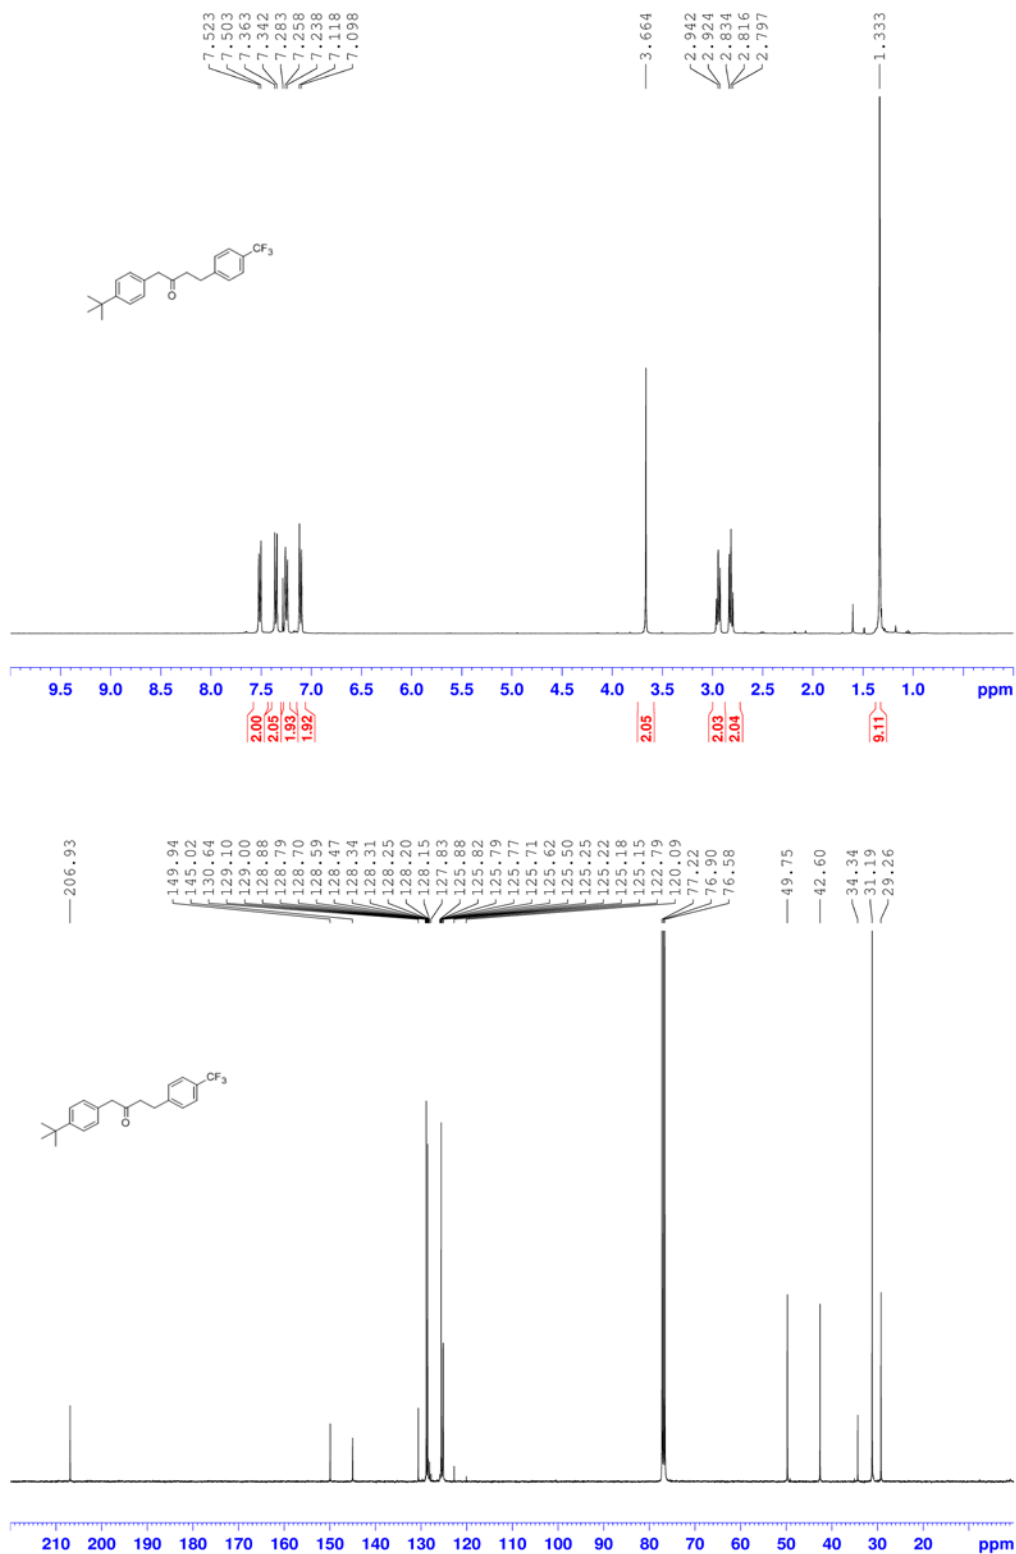

Rosa and Orellana

**<sup>1</sup>H- and <sup>13</sup>C-NMR data for ketone 6a**

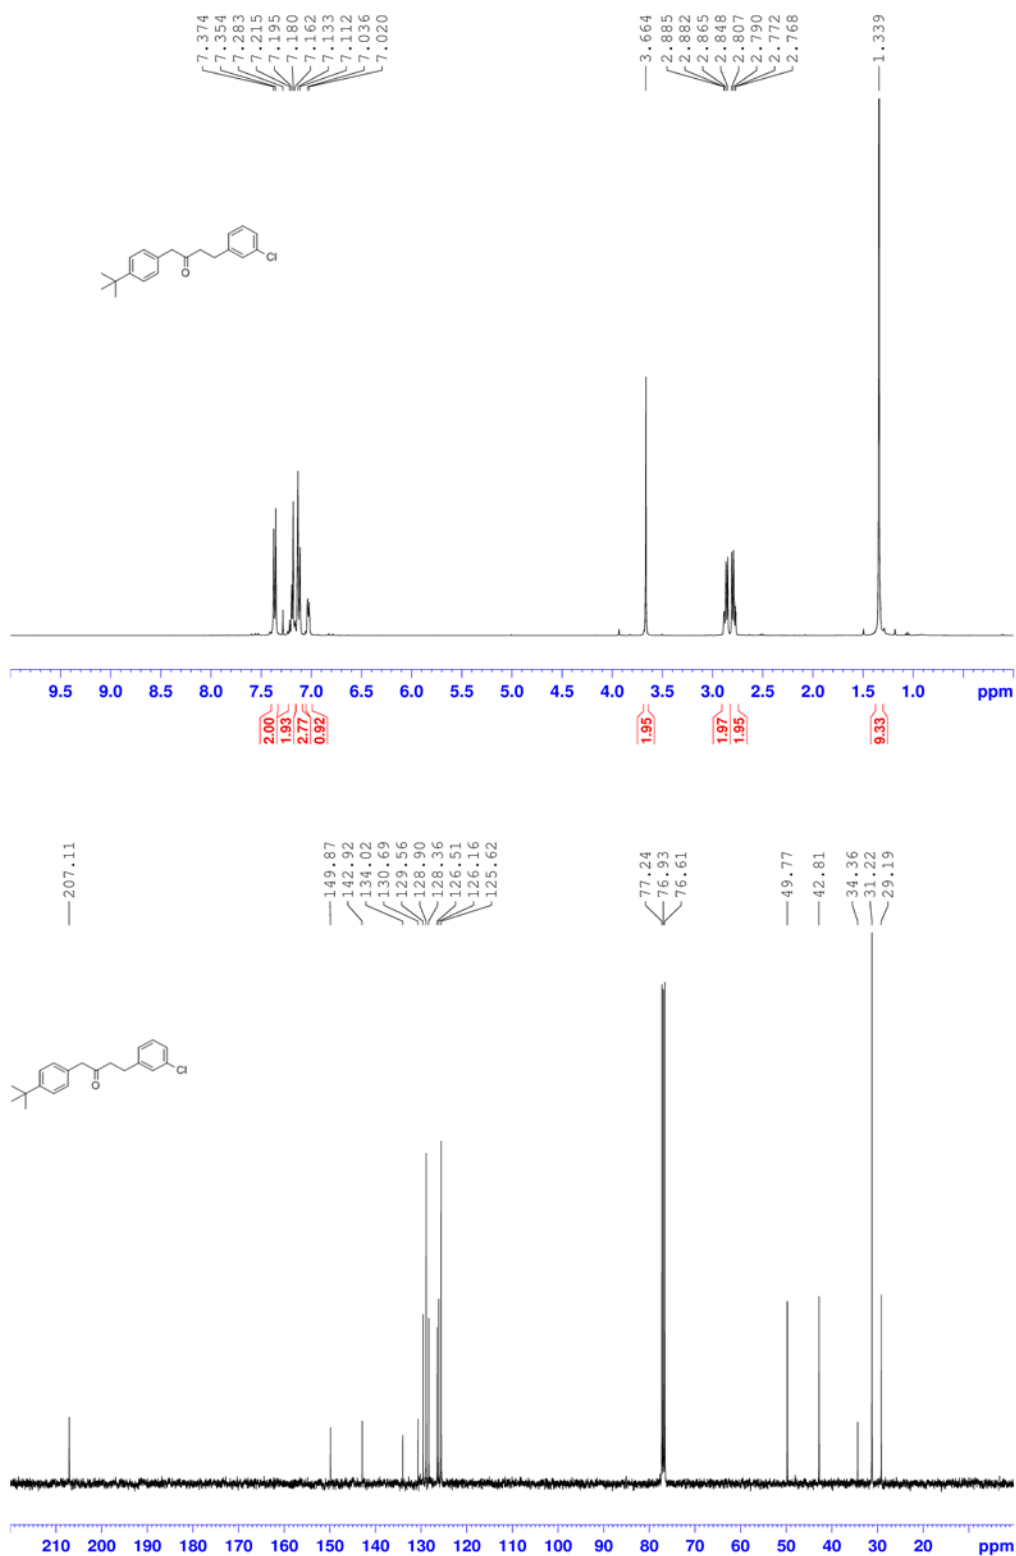

Rosa and Orellana

**$^1\text{H}$  and  $^{13}\text{C}$  NMR data for ketone 7a**

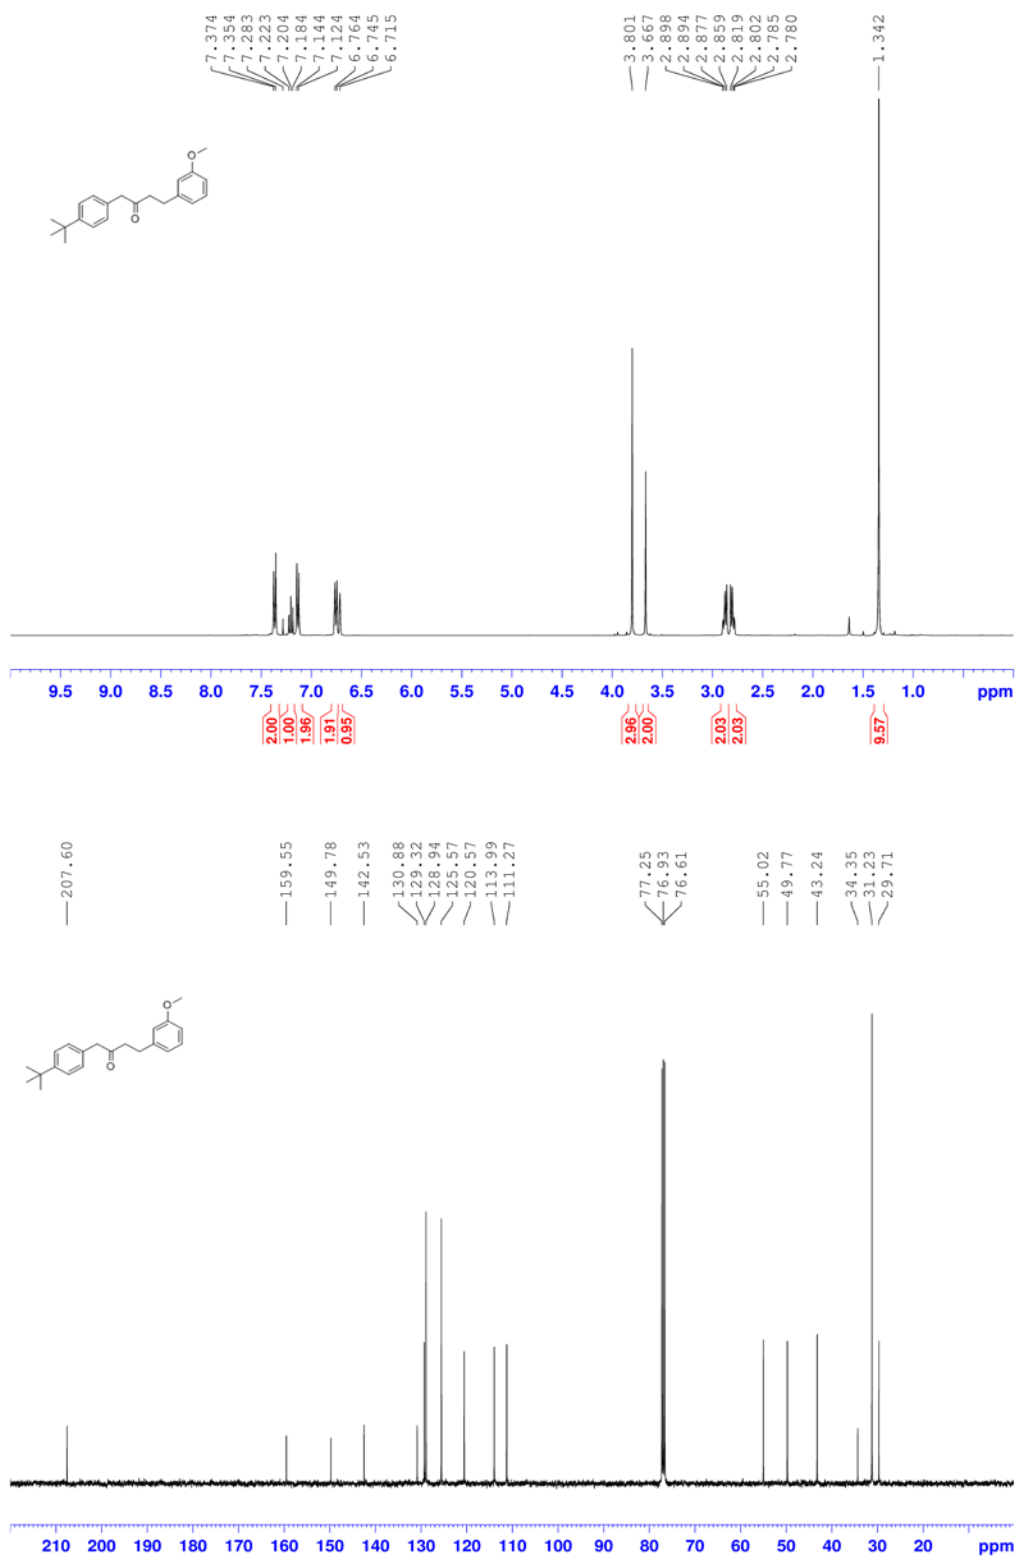

Rosa and Orellana

**<sup>1</sup>H- and <sup>13</sup>C-NMR data for ketone 8a**

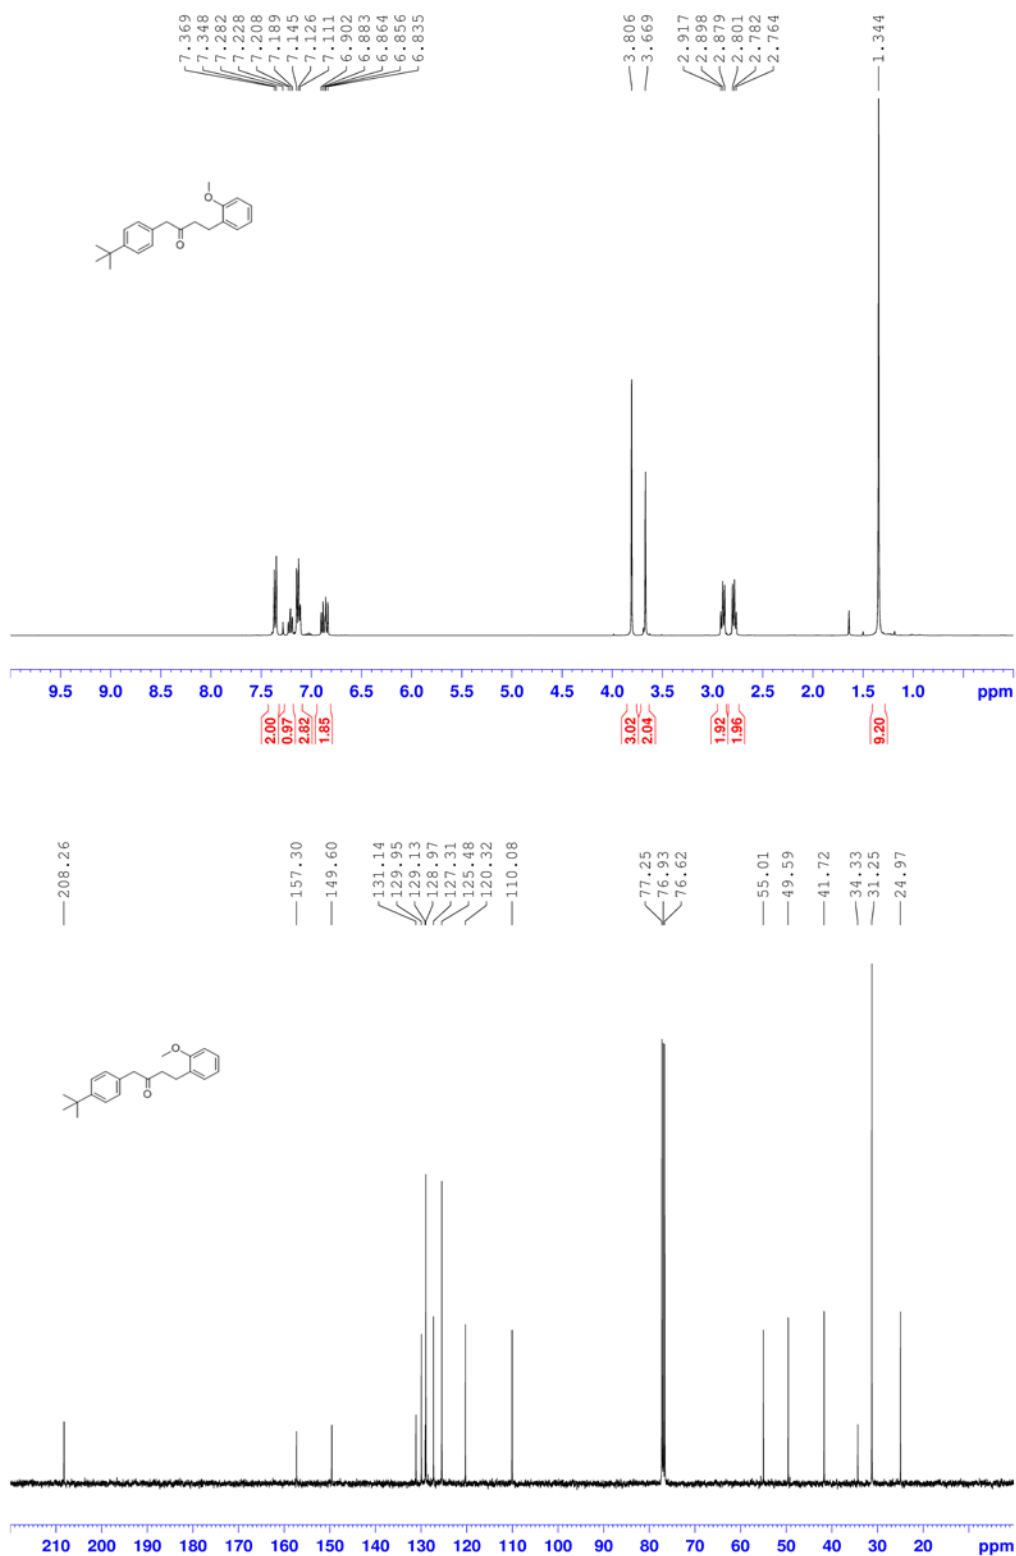

Rosa and Orellana

**<sup>1</sup>H- and <sup>13</sup>C-NMR data for ketone 9a**

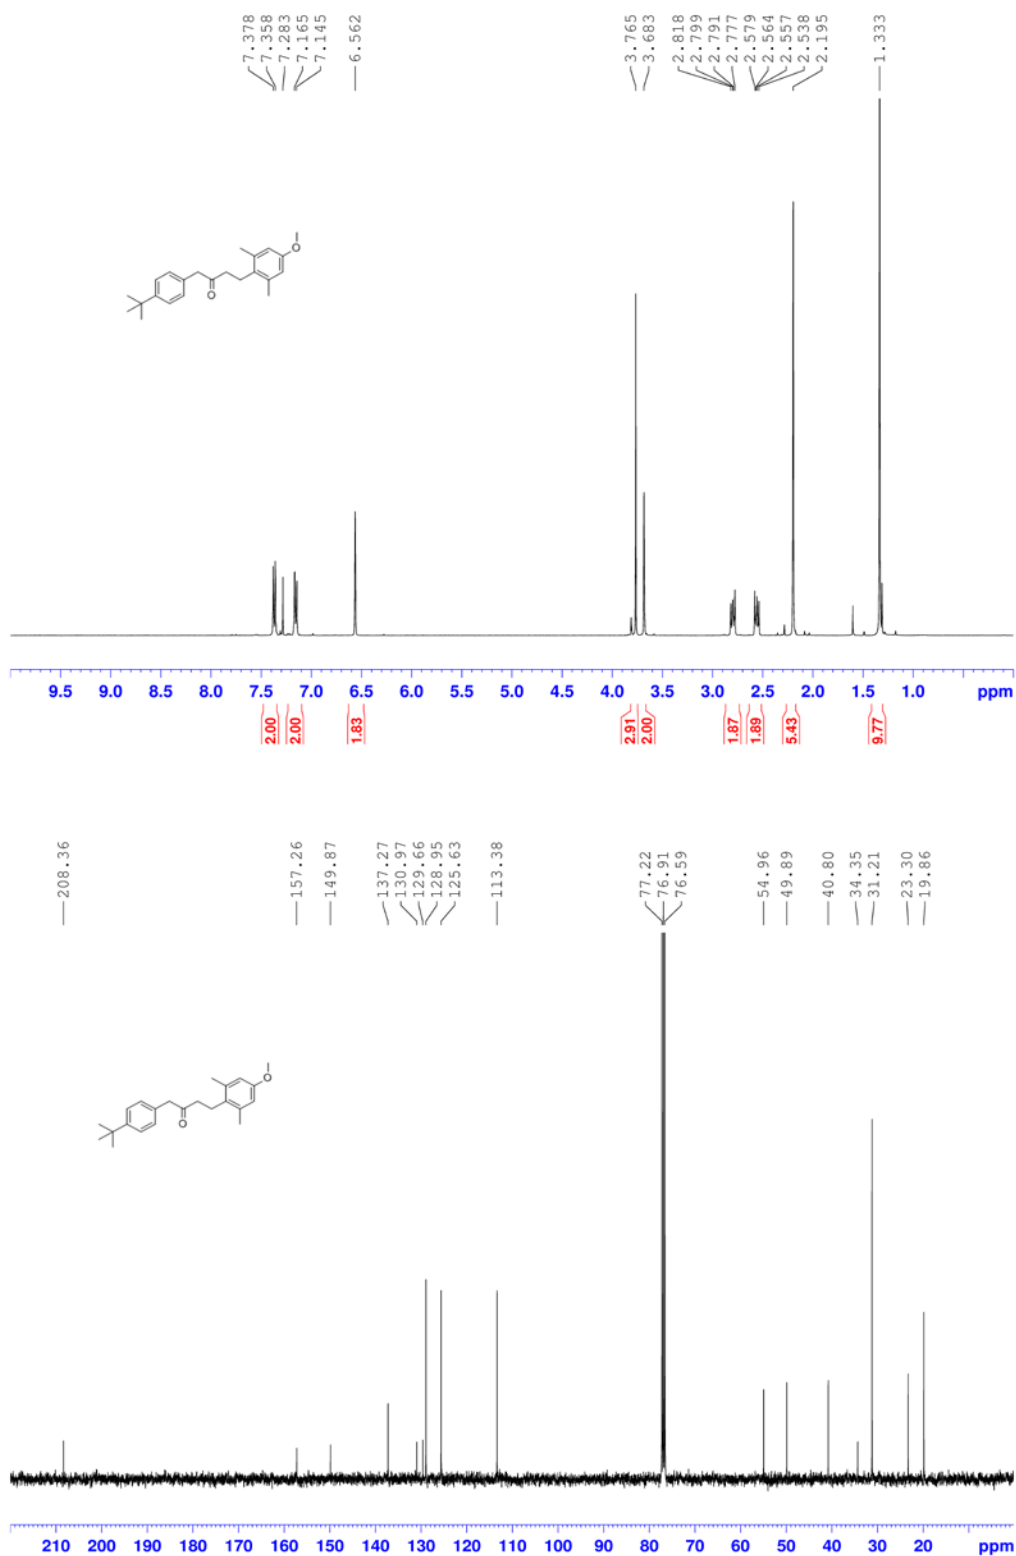



Rosa and Orellana

**<sup>1</sup>H- and <sup>13</sup>C-NMR data for α, β-unsaturated ketone 9c**

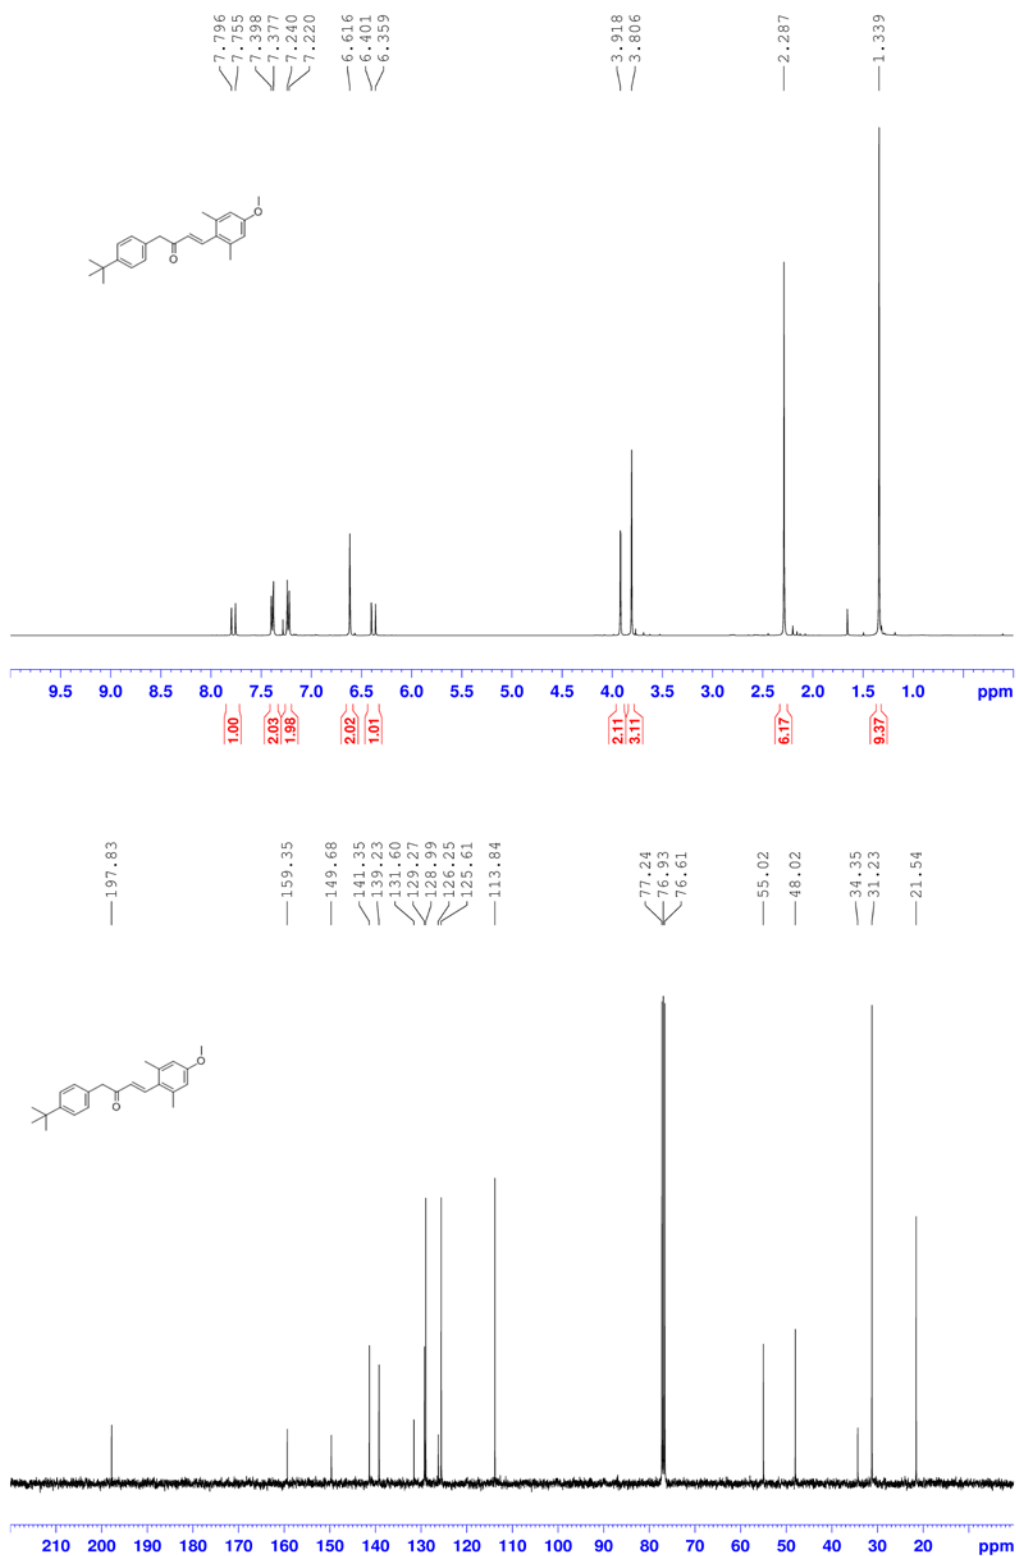

Rosa and Orellana

**<sup>1</sup>H- and <sup>13</sup>C-NMR data for ketone 10a**

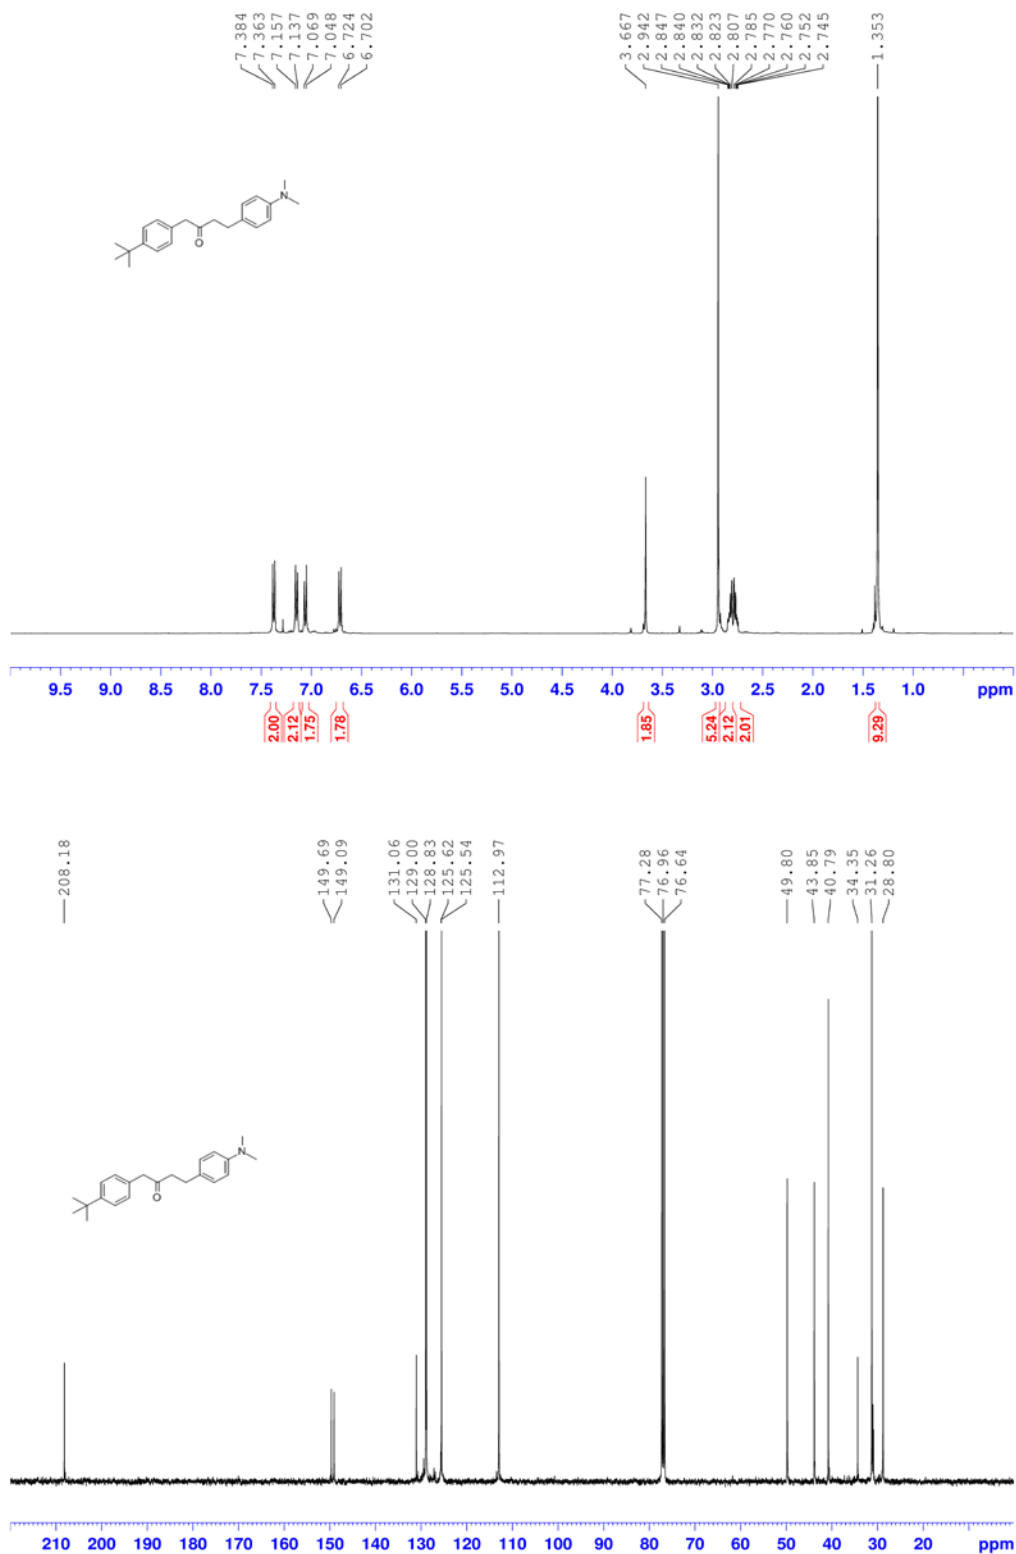

Rosa and Orellana

<sup>1</sup>H- and <sup>13</sup>C-NMR data for ketone 11a

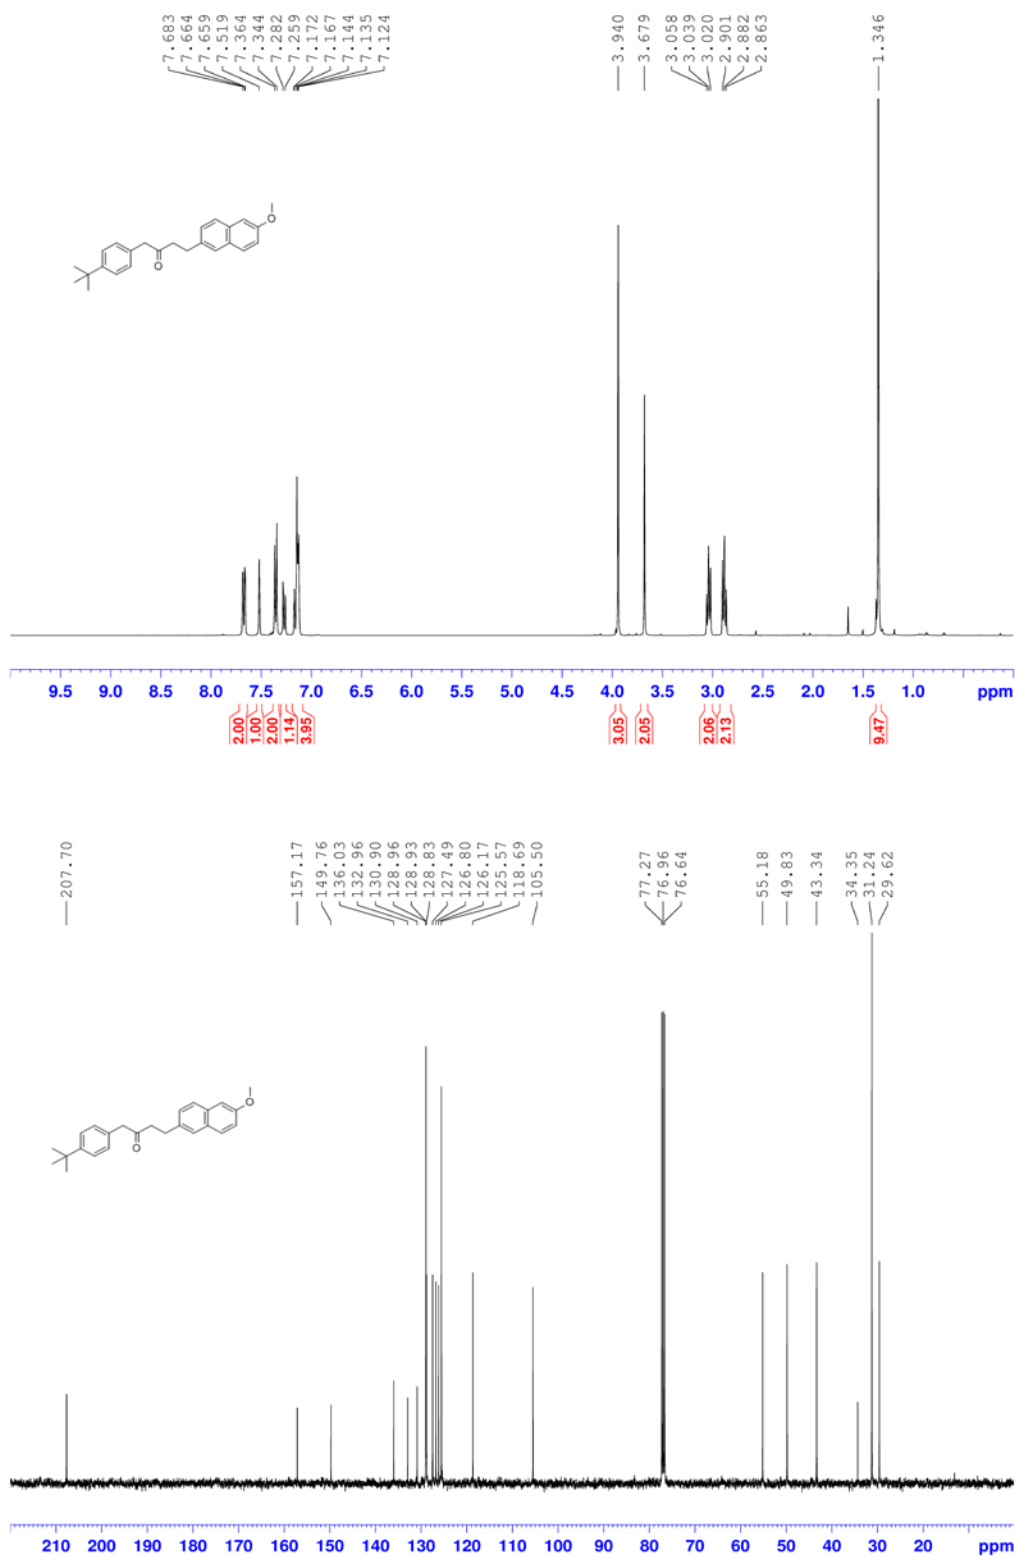

Rosa and Orellana

<sup>1</sup>H- and <sup>13</sup>C-NMR data for α, β-unsaturated ketone 11c

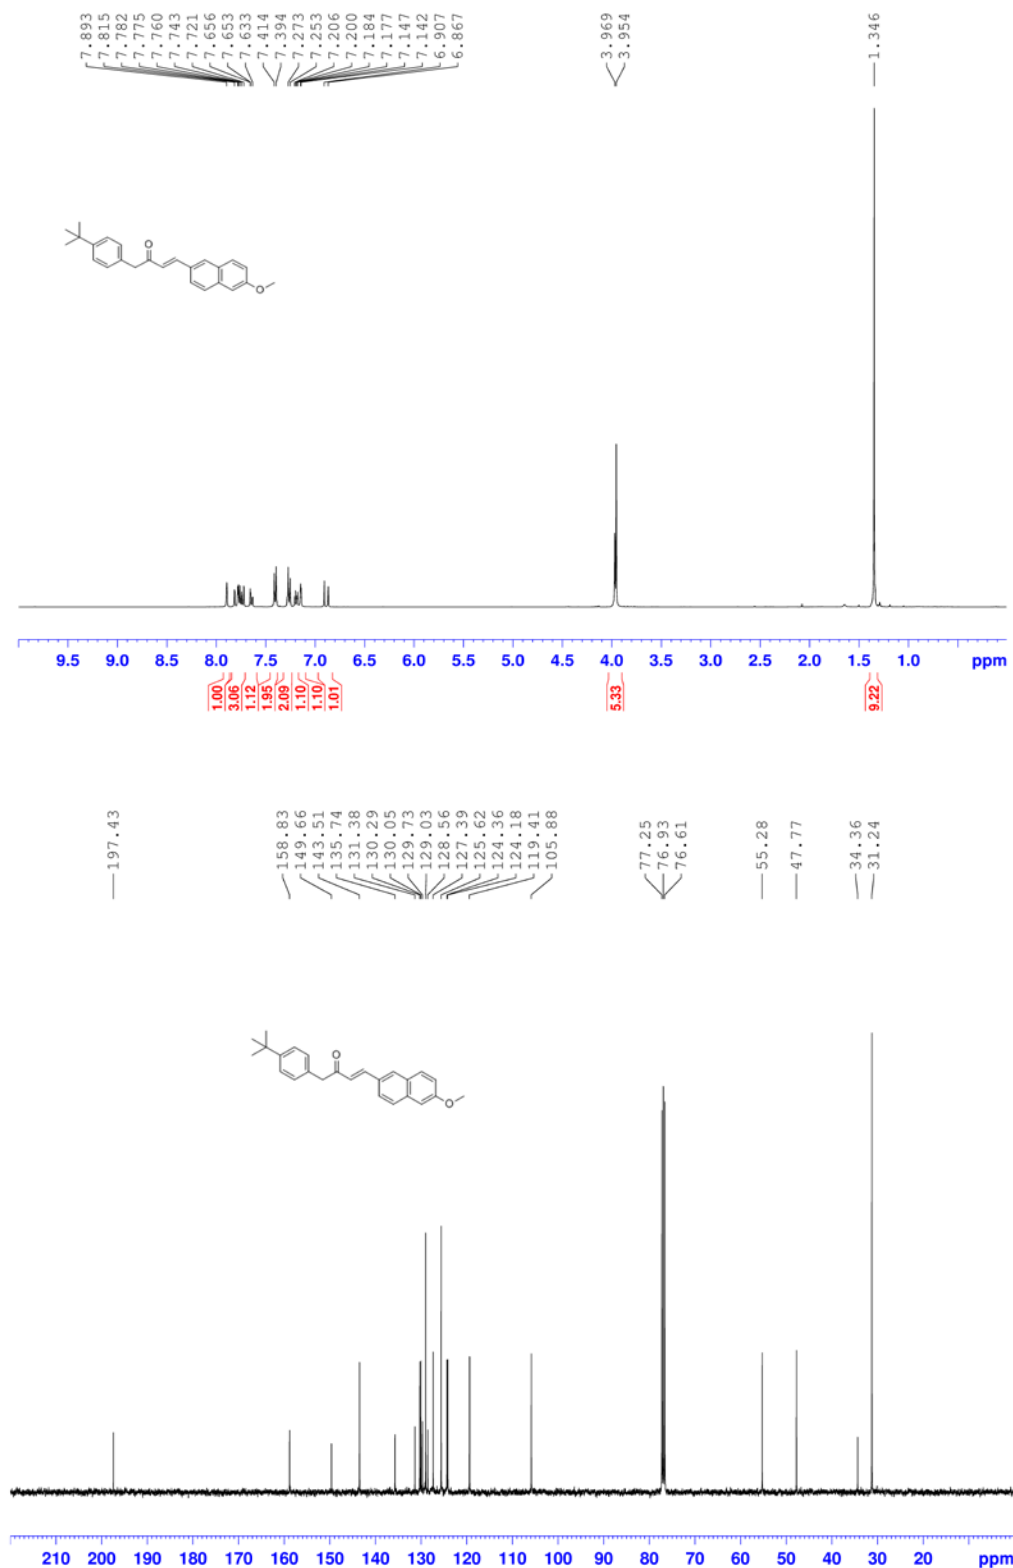

Rosa and Orellana

**$^1\text{H}$ - and  $^{13}\text{C}$ -NMR data for ketone 12a**

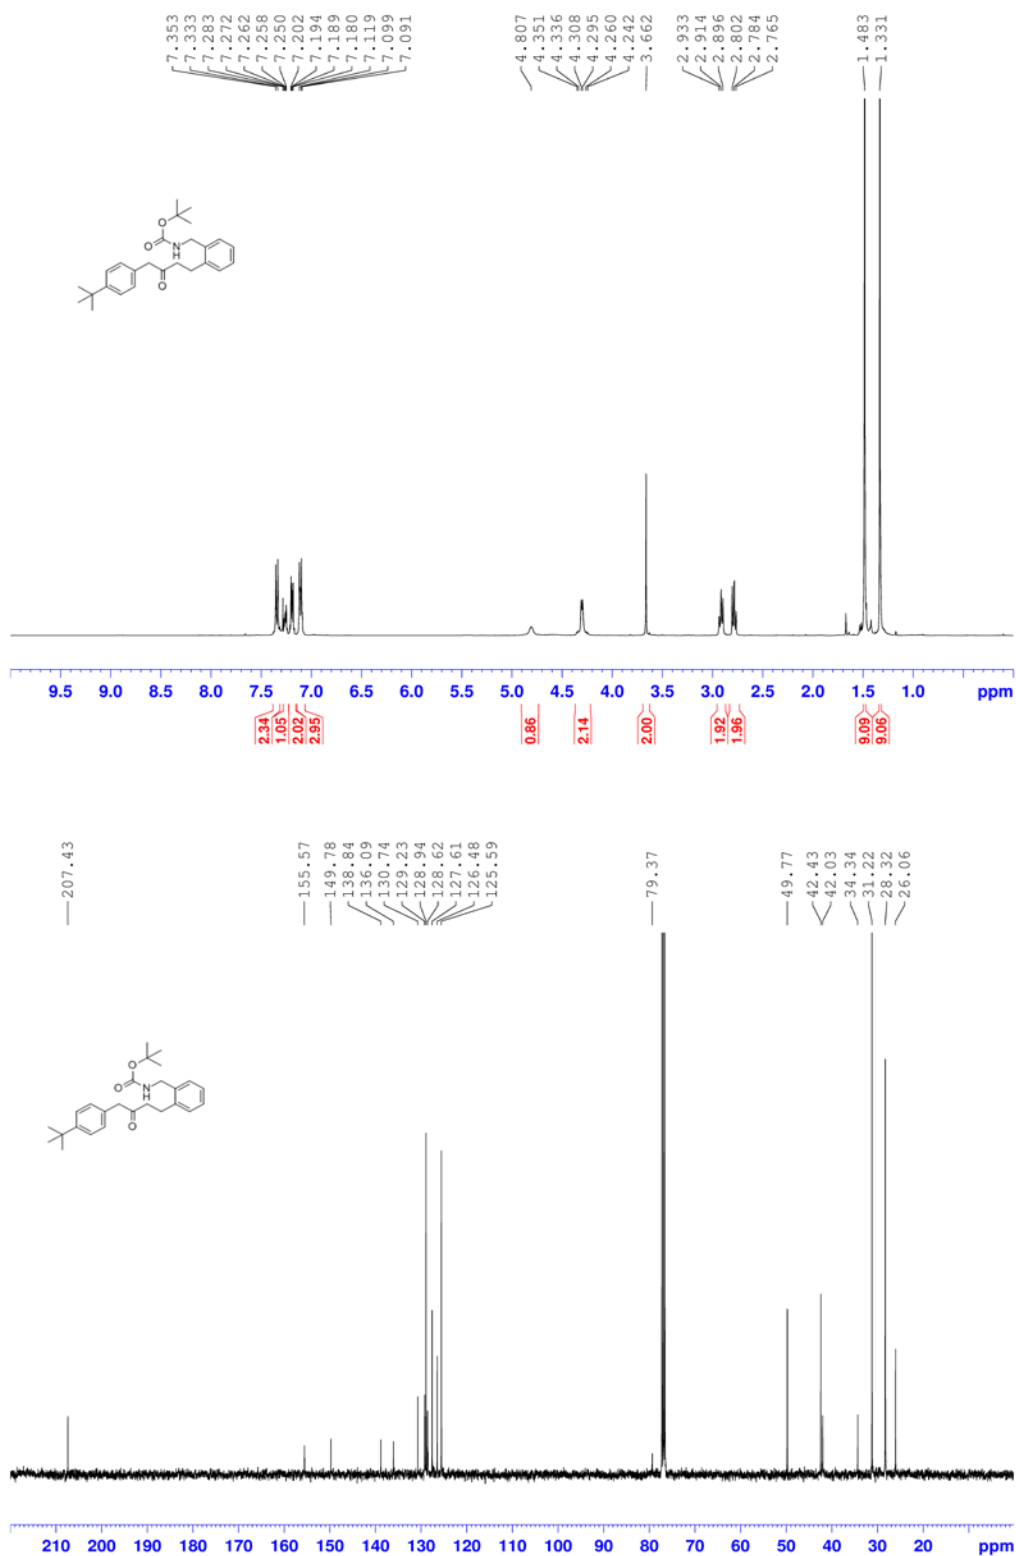

Rosa and Orellana

**$^1\text{H}$ - and  $^{13}\text{C}$ -NMR data for ketone 13a**

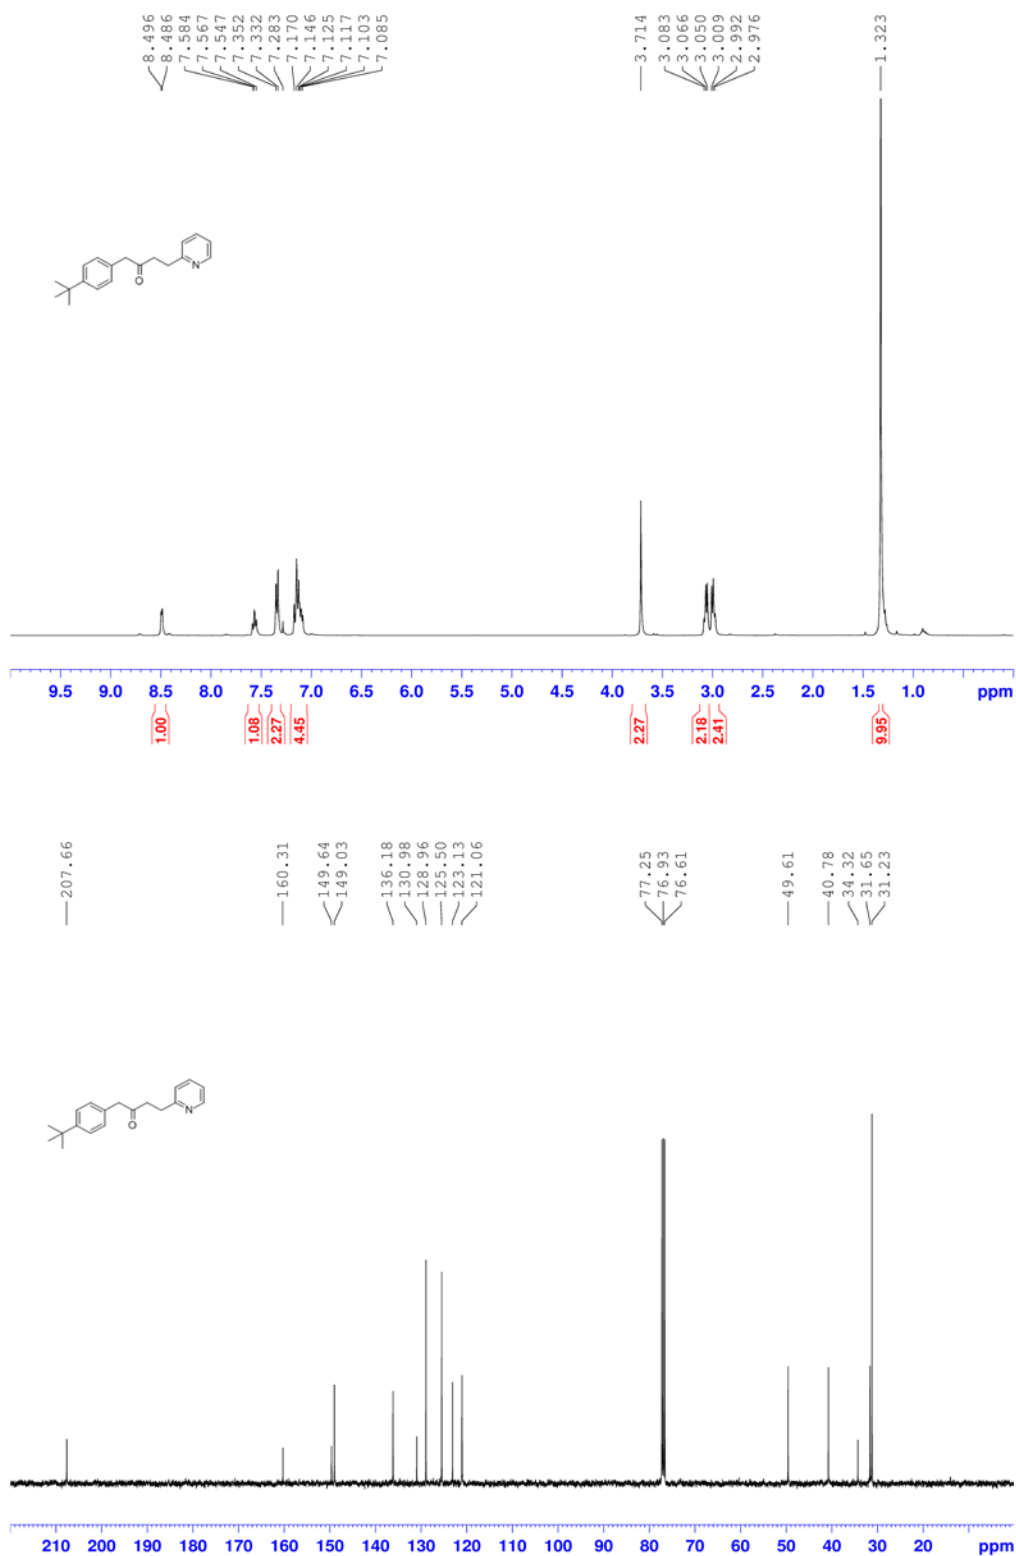

Rosa and Orellana

**<sup>1</sup>H- and <sup>13</sup>C-NMR data for ketone 14a**

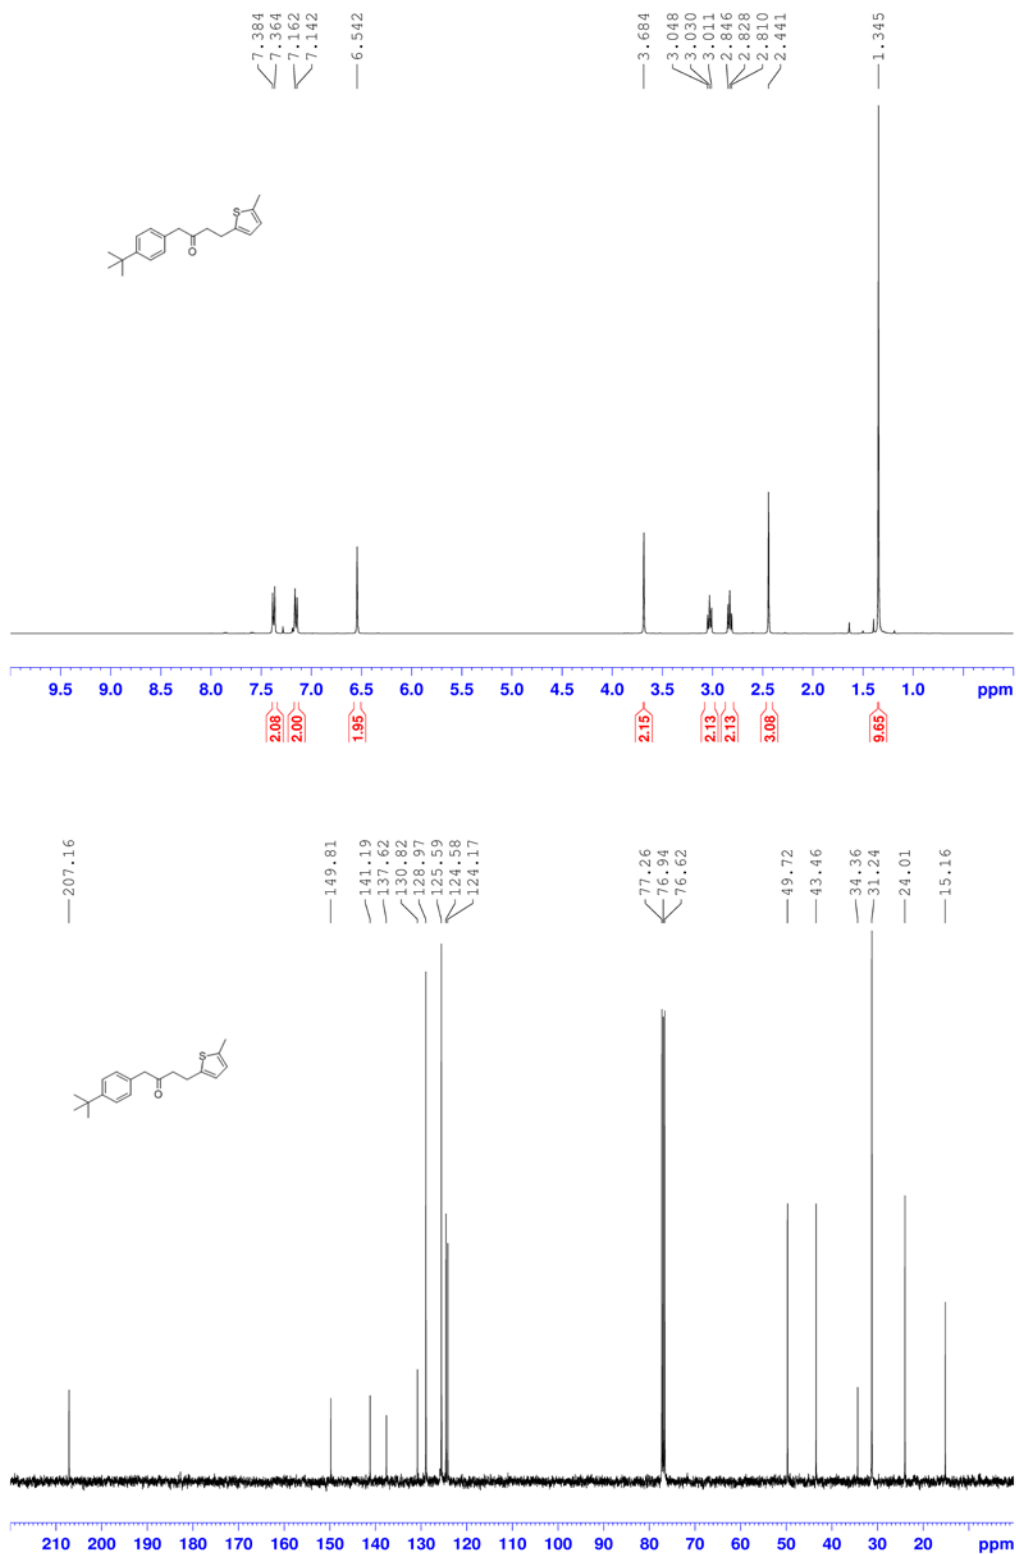

Rosa and Orellana

**<sup>1</sup>H- and <sup>13</sup>C-NMR data for ketone 15a**

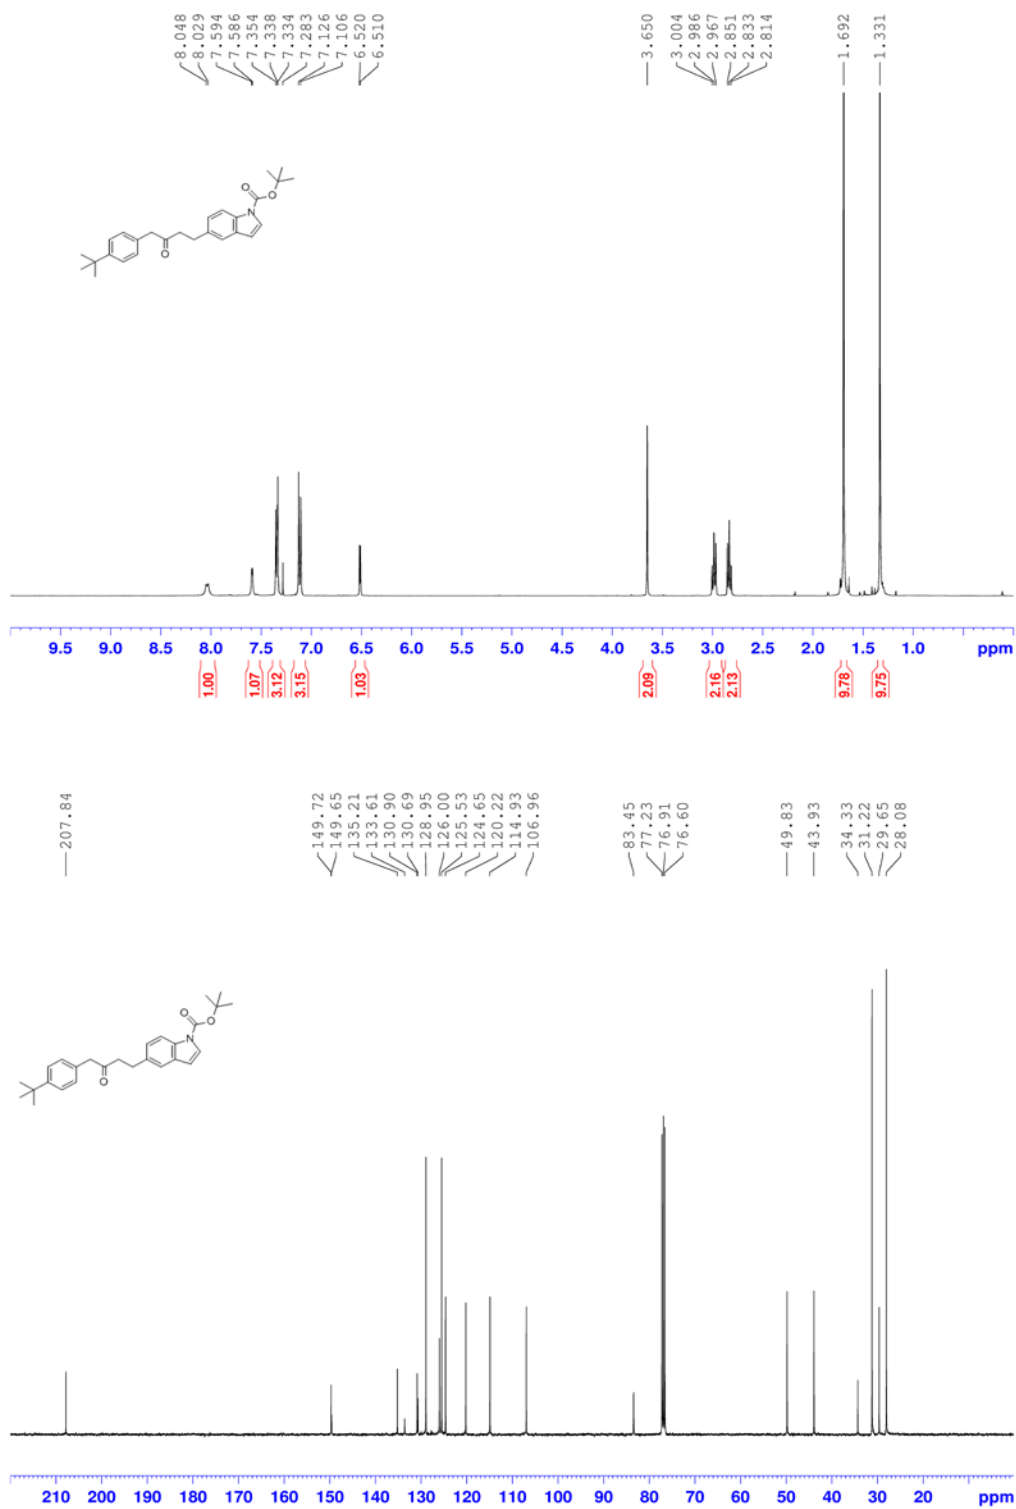



Rosa and Orellana

**$^1\text{H}$ - and  $^{13}\text{C}$ -NMR data for ketone 16a**

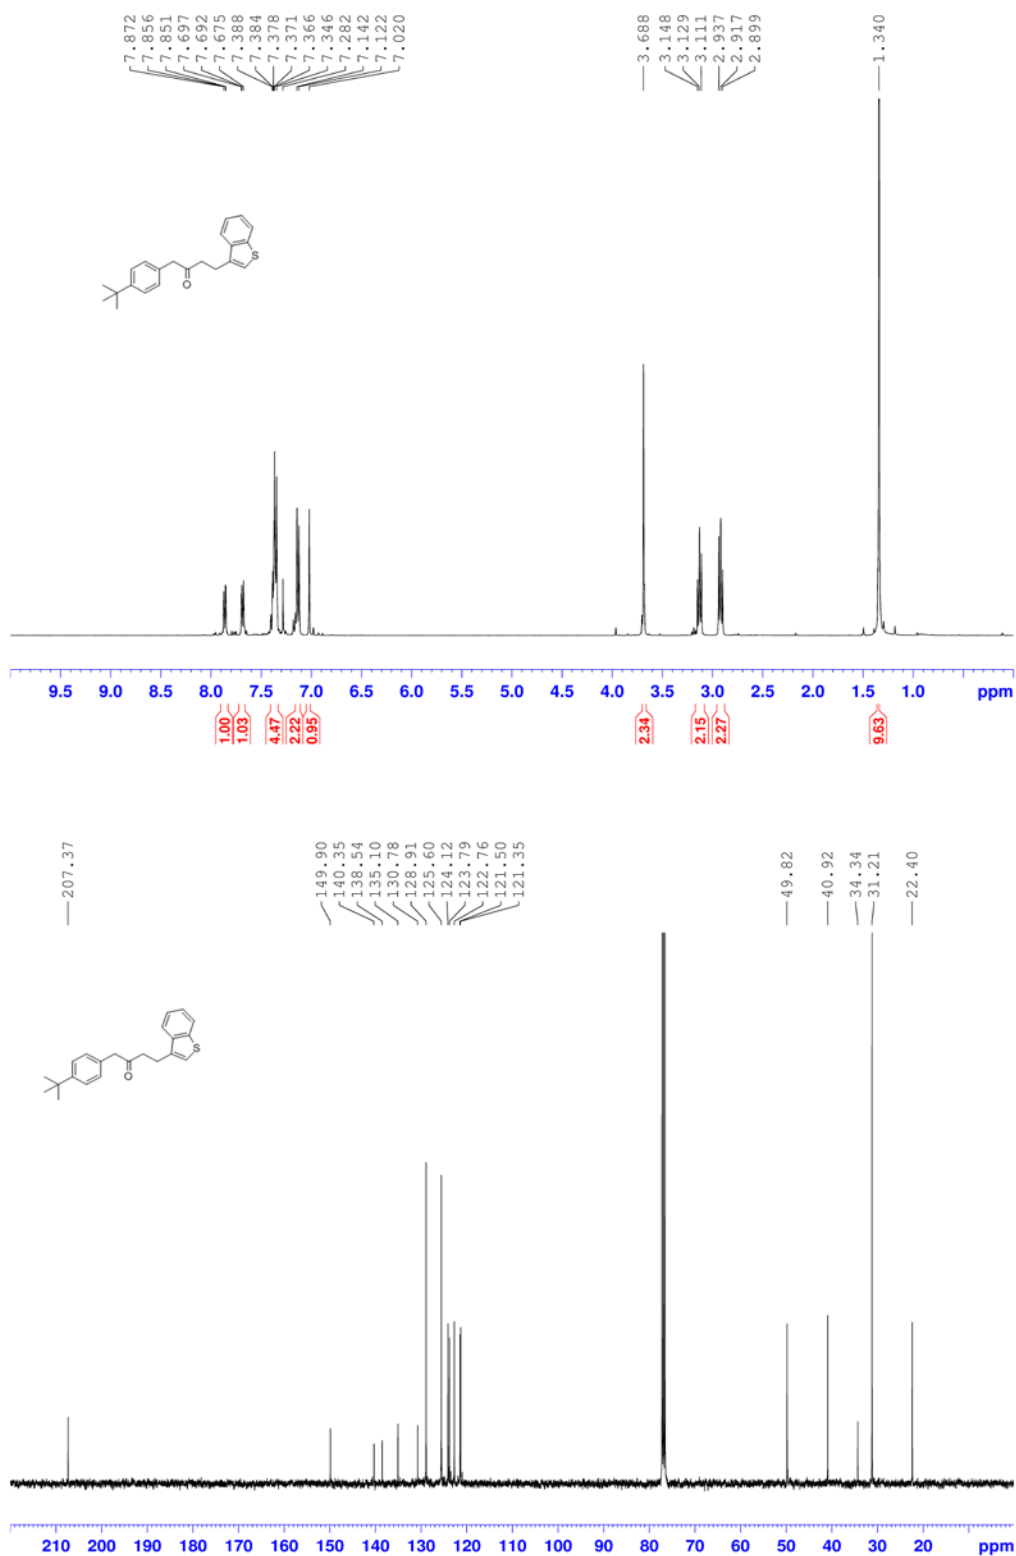

Rosa and Orellana

**$^1\text{H}$ - and  $^{13}\text{C}$ -NMR data for ketone 17a**

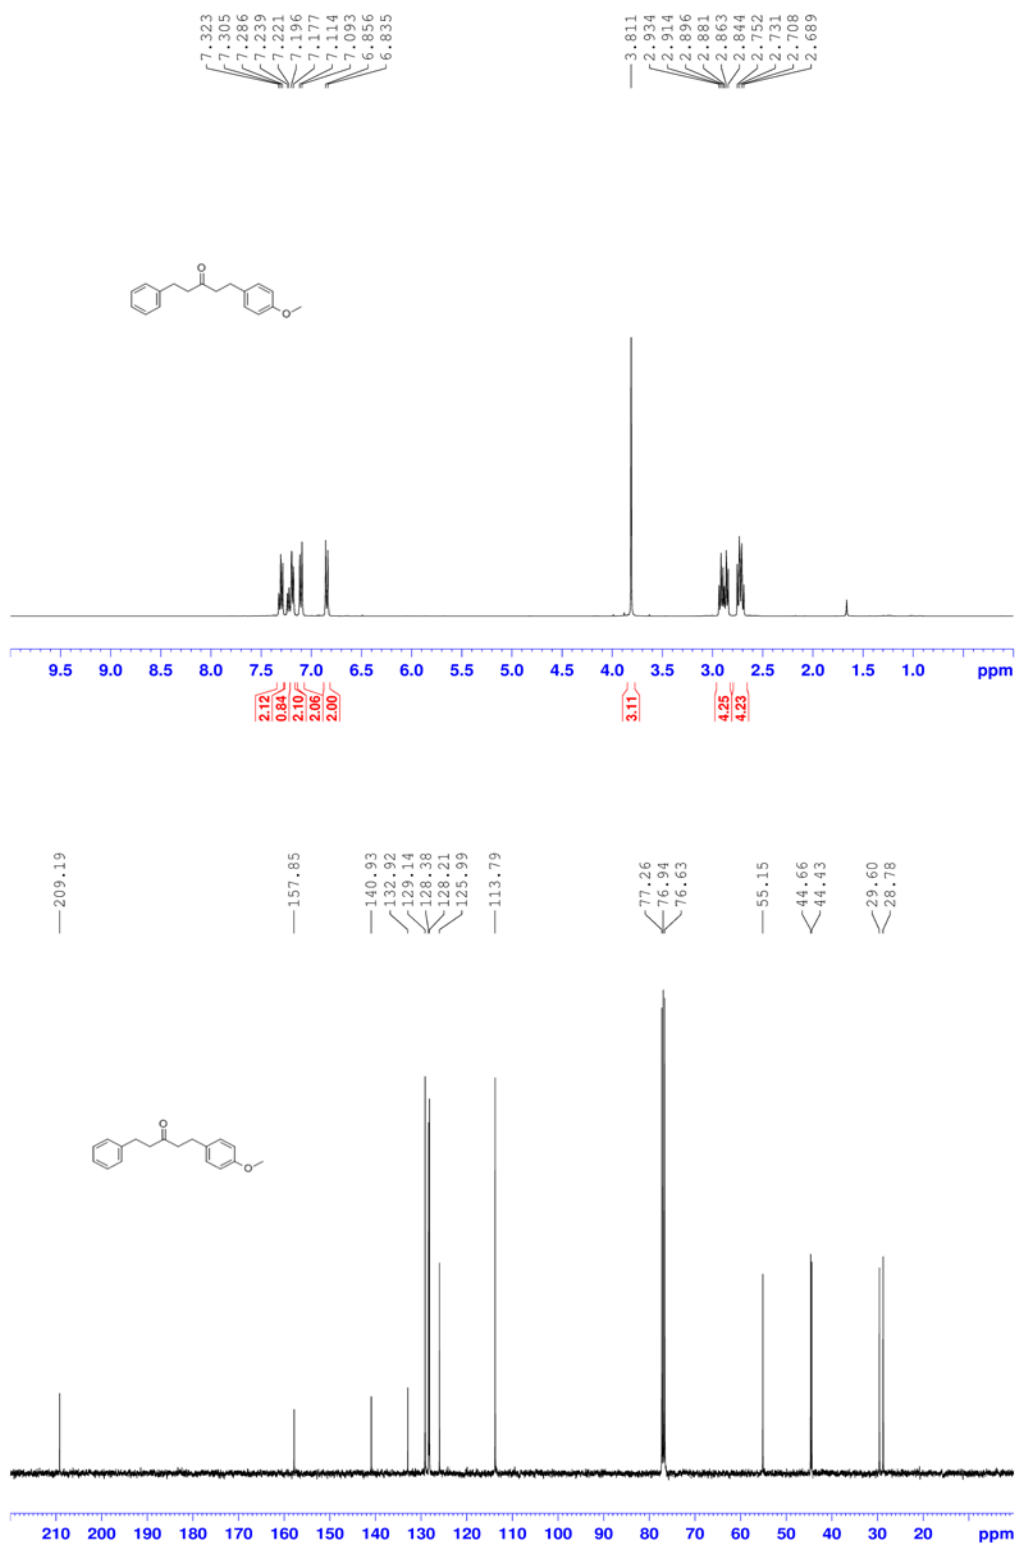

Rosa and Orellana

**$^1\text{H}$ - and  $^{13}\text{C}$ -NMR data for ketone 18a**

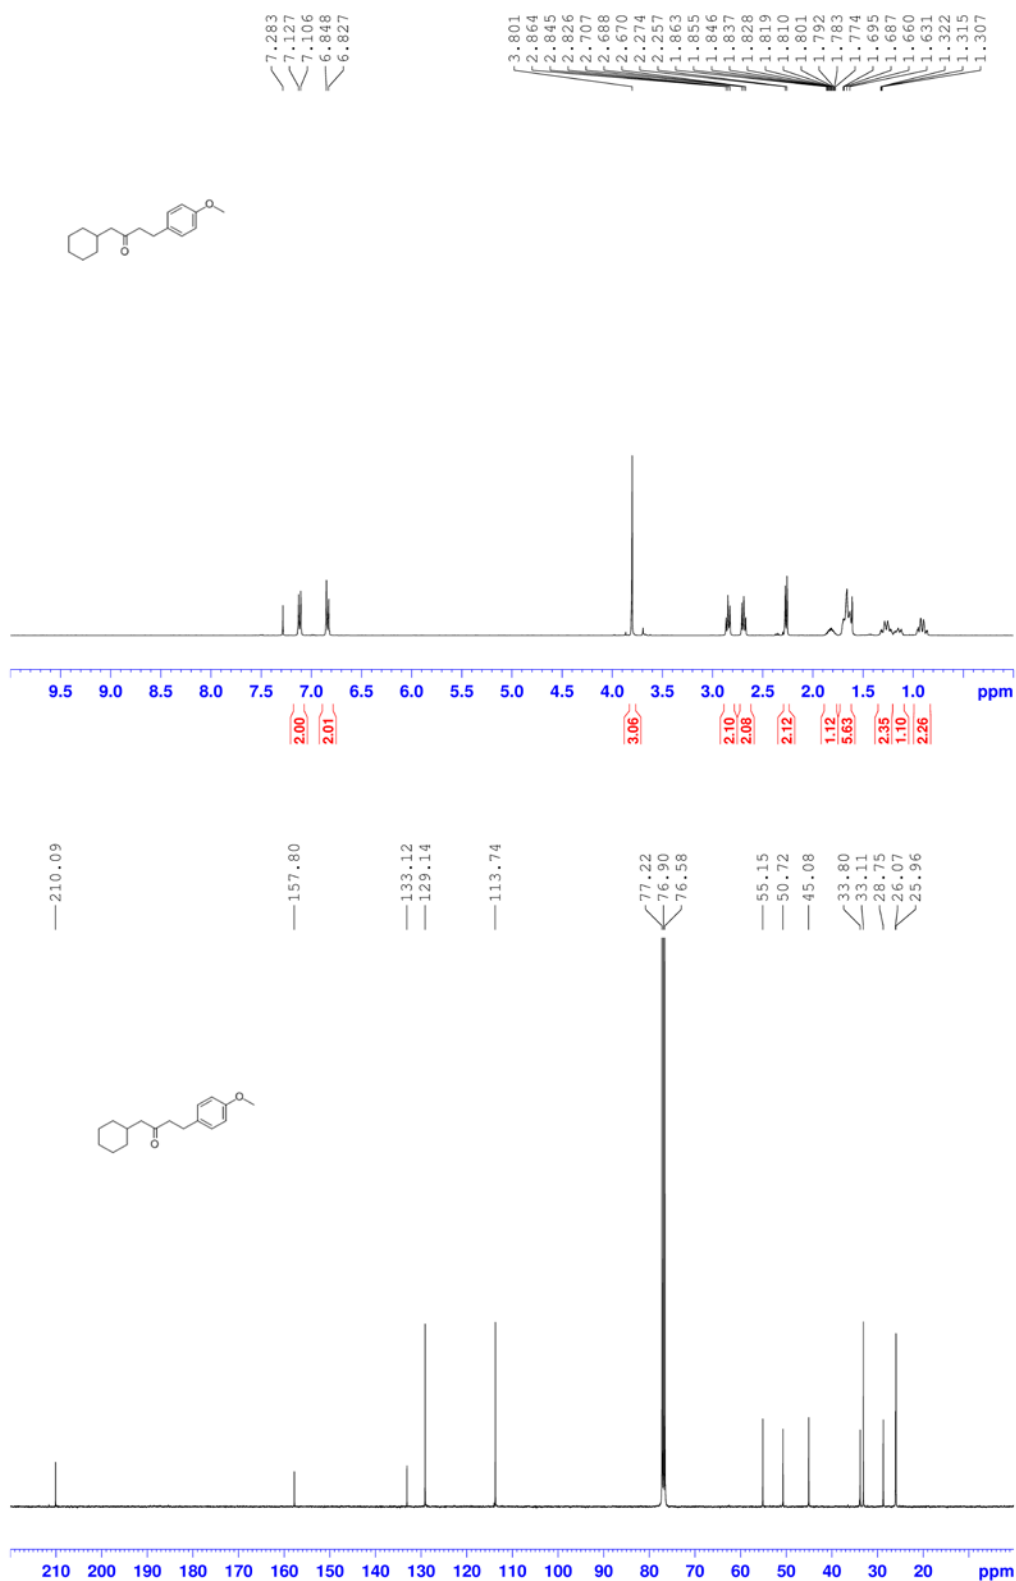

Rosa and Orellana

**<sup>1</sup>H- and <sup>13</sup>C-NMR data for α, β-unsaturated ketone 18c**

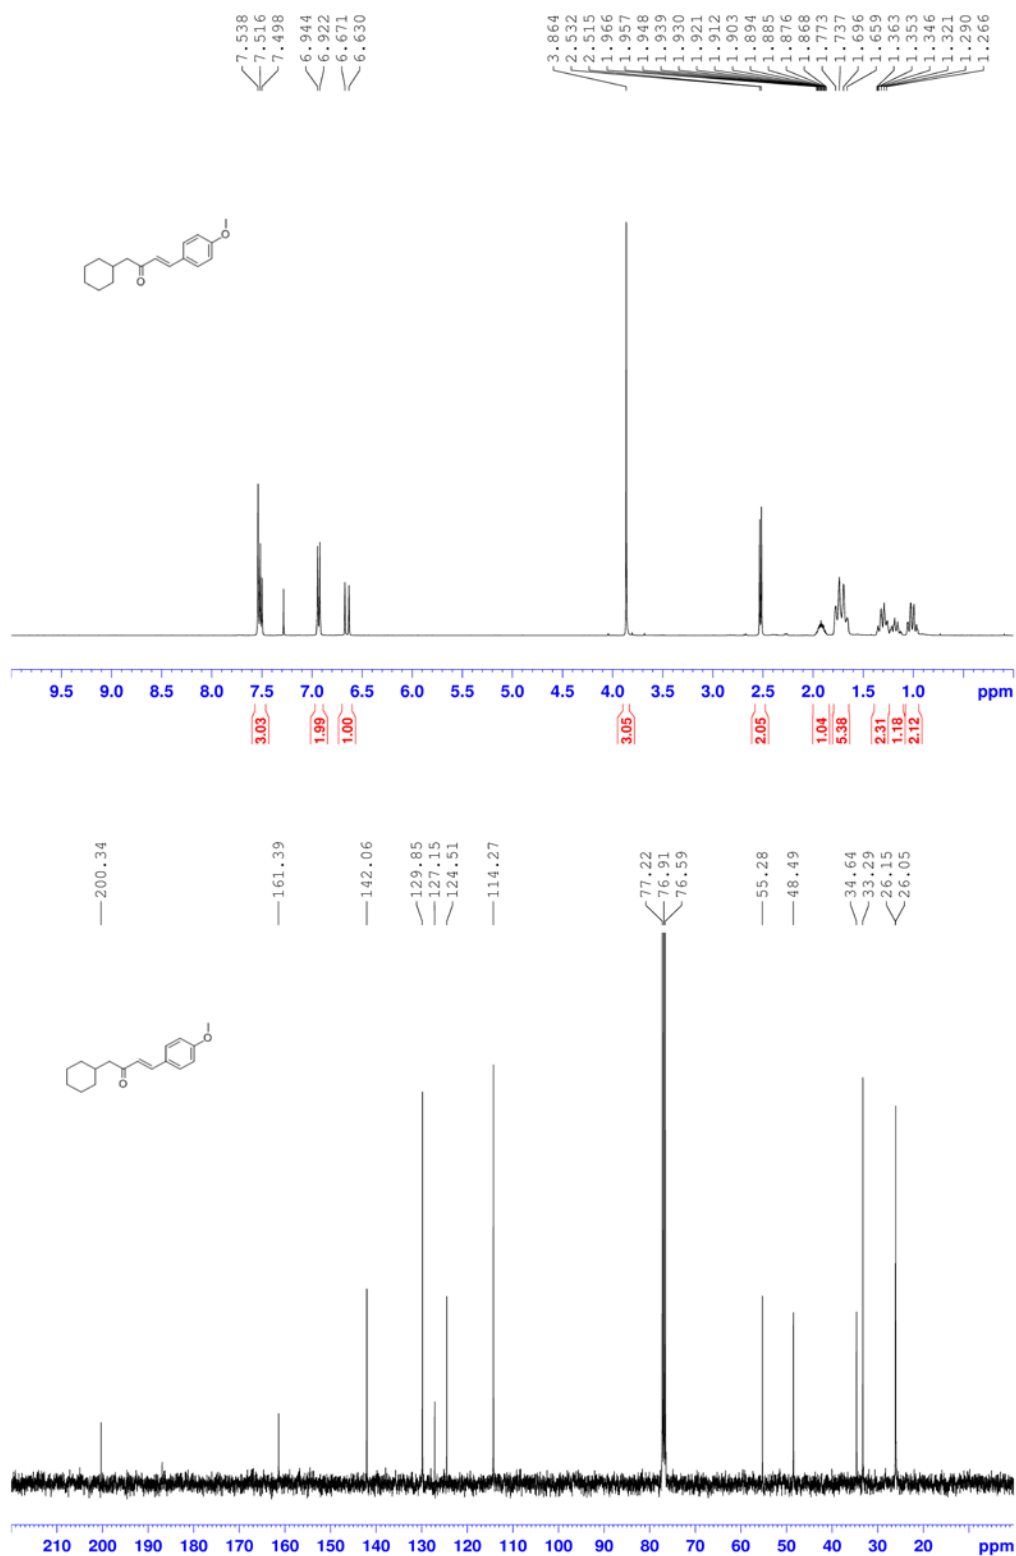

Rosa and Orellana

**$^1\text{H}$ - and  $^{13}\text{C}$ -NMR data for ketone 19a**

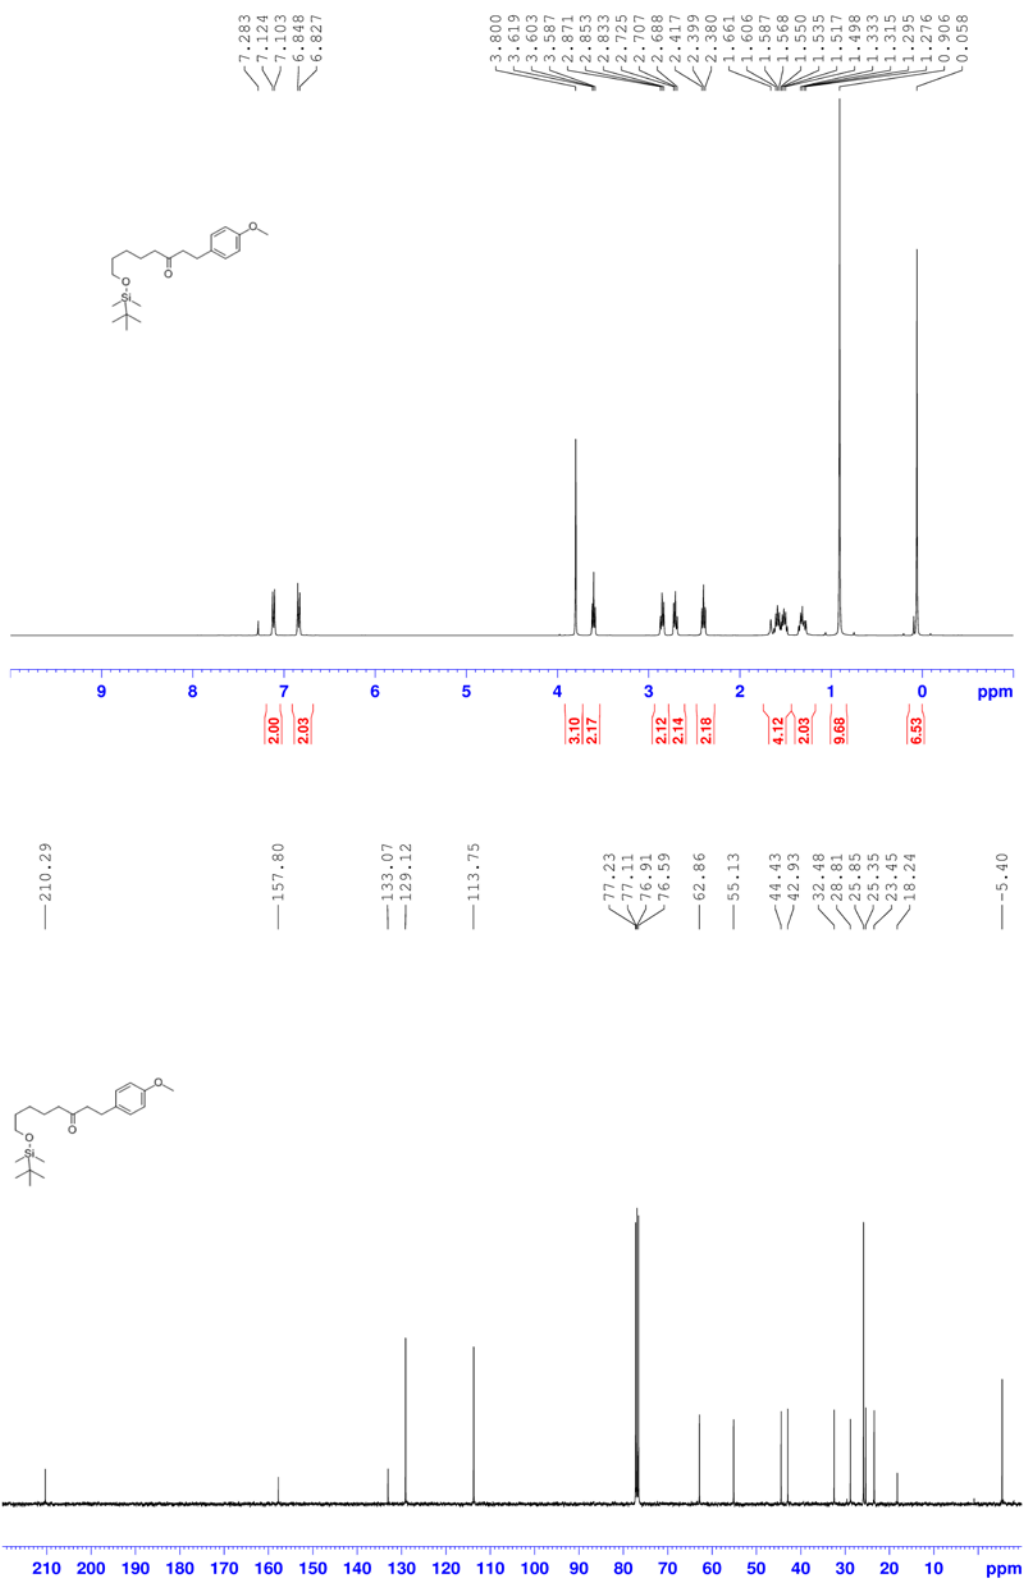

Rosa and Orellana

**<sup>1</sup>H- and <sup>13</sup>C-NMR data for α, β-unsaturated ketone 19c**

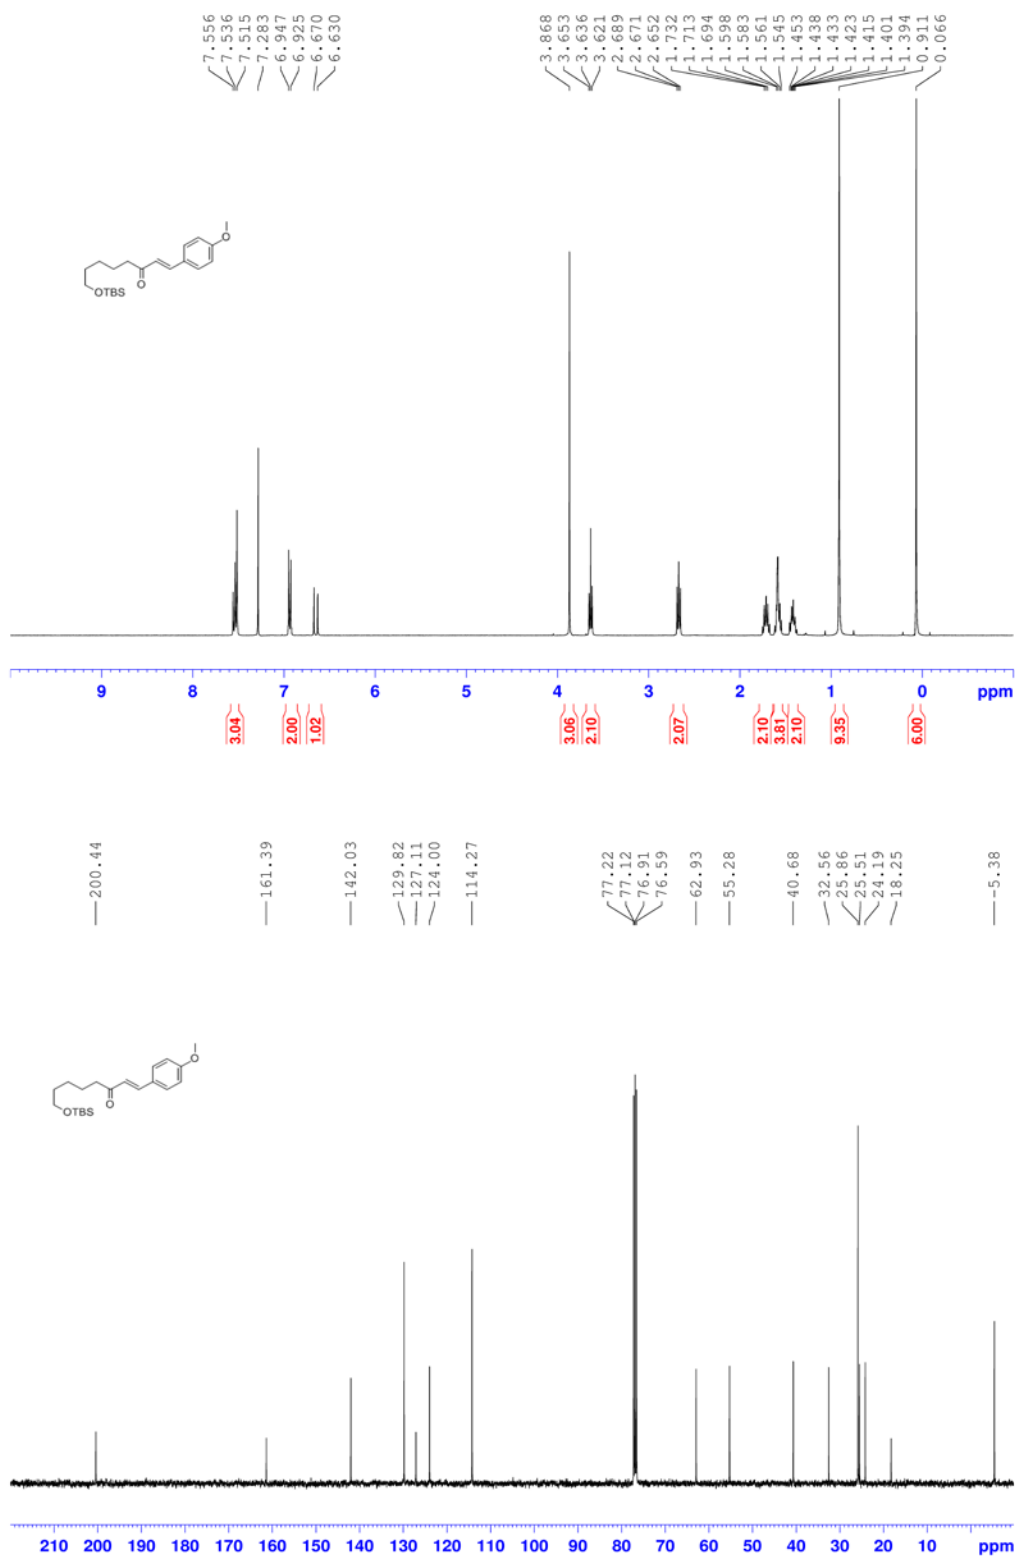

Rosa and Orellana

**$^1\text{H}$ - and  $^{13}\text{C}$ -NMR data for ketone 20a**

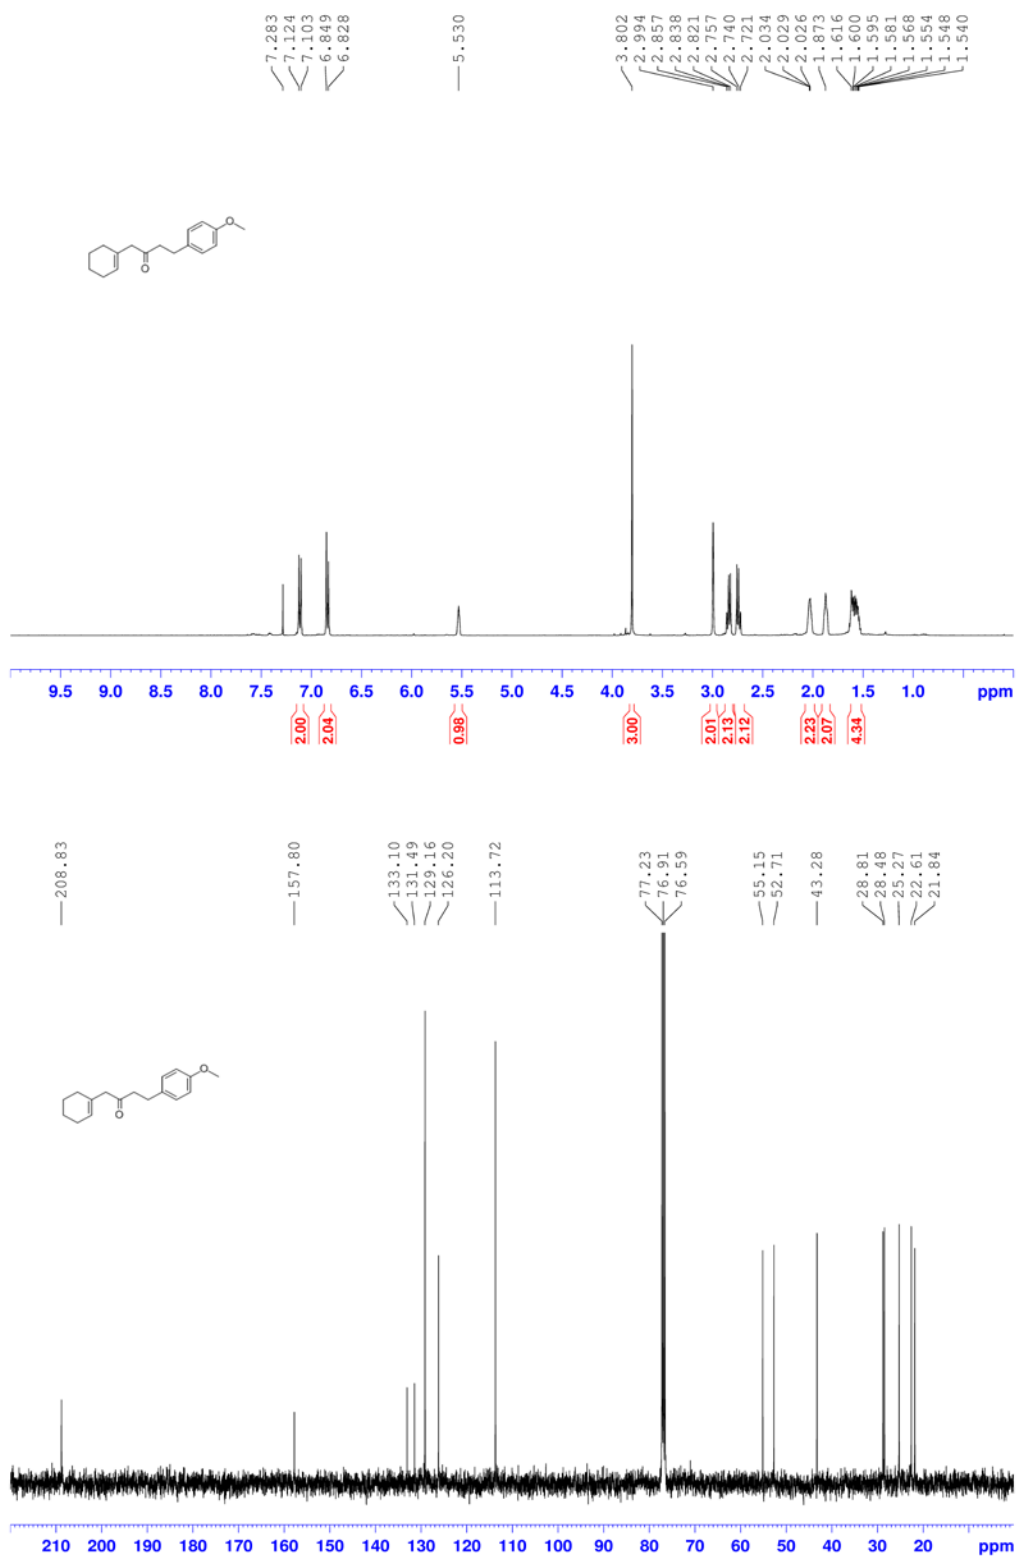

Rosa and Orellana

**<sup>1</sup>H- and <sup>13</sup>C-NMR data for α, β-unsaturated ketone 20c**

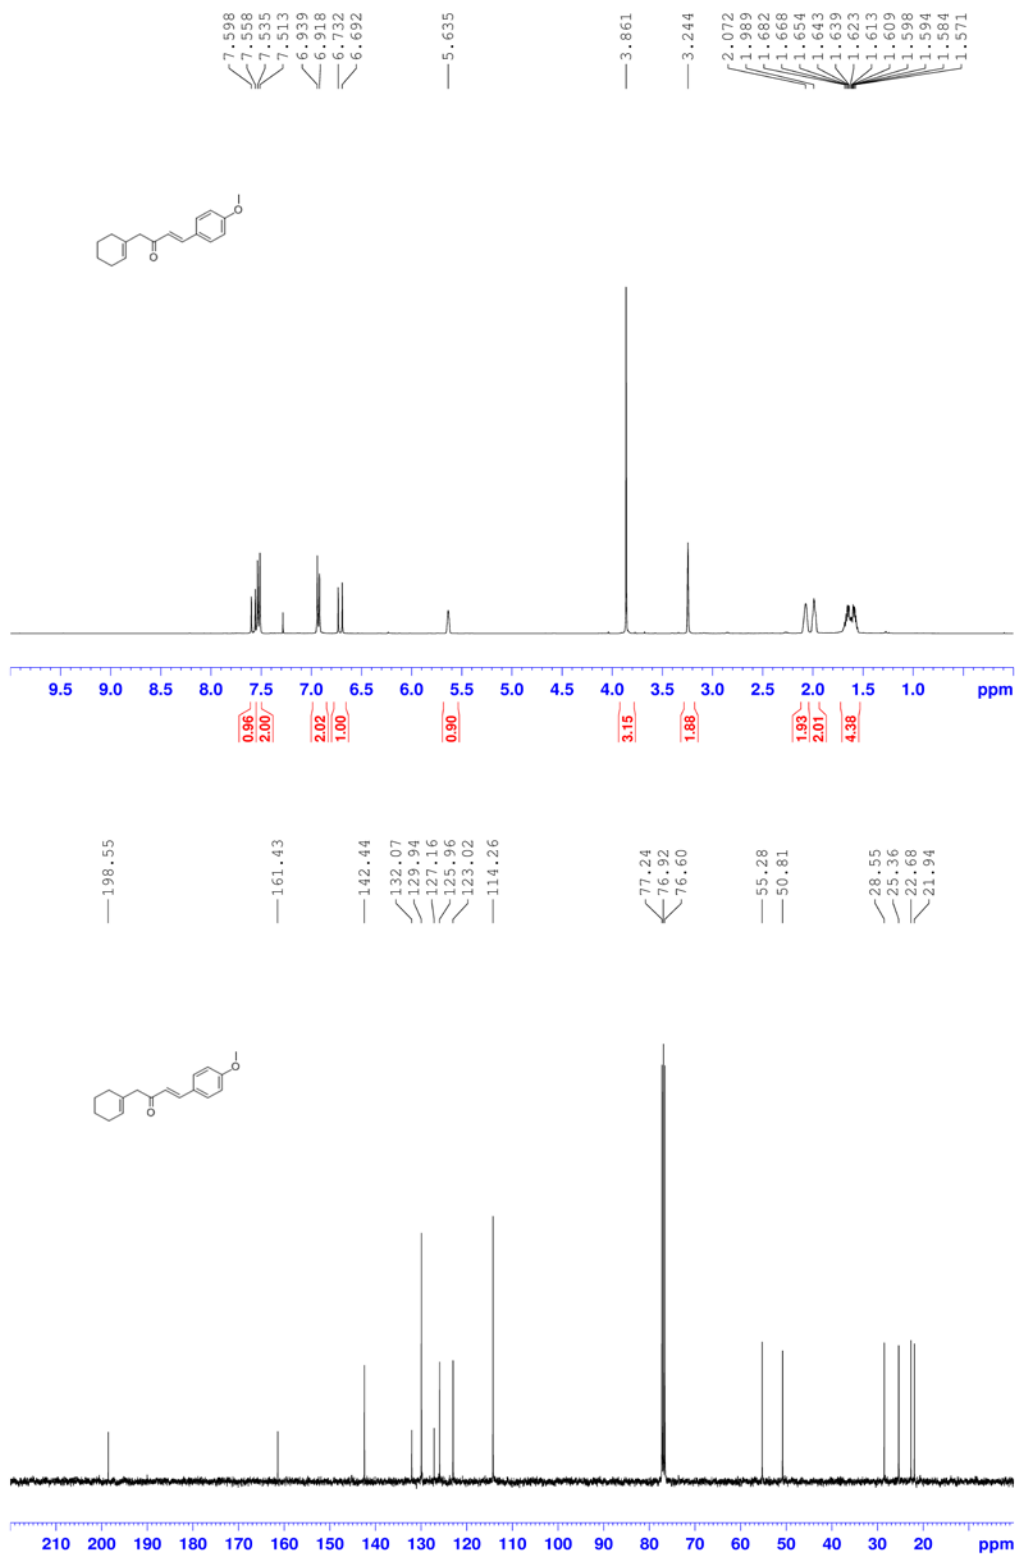



Rosa and Orellana

**<sup>1</sup>H- and <sup>13</sup>C-NMR data for ketone 21a**

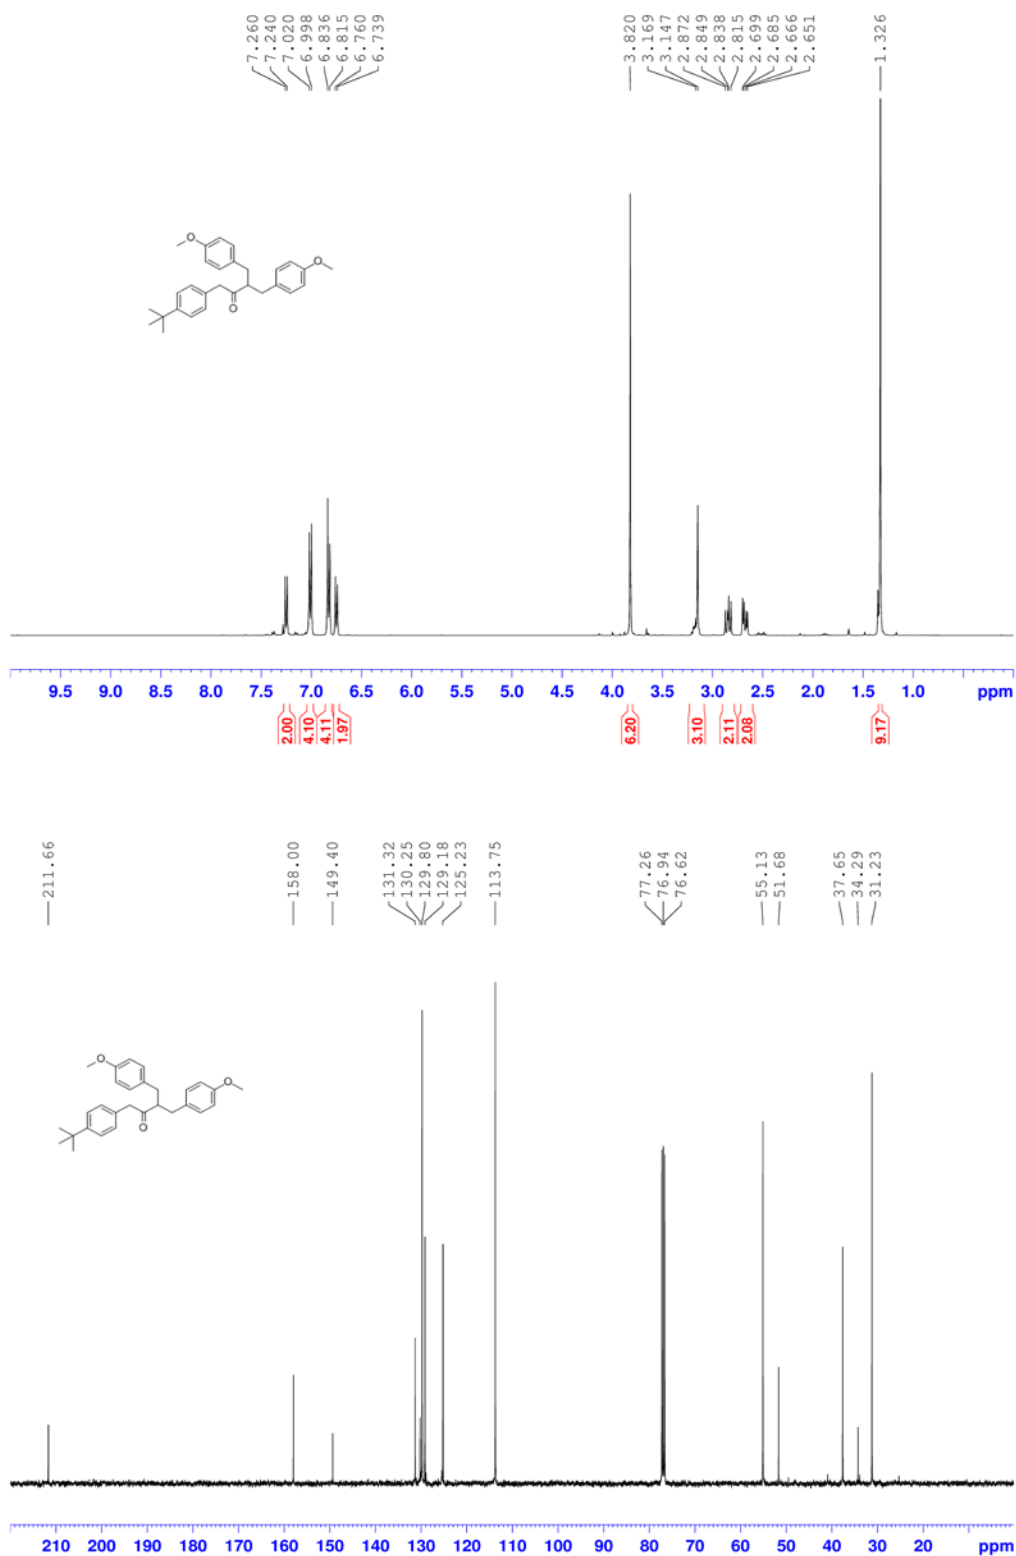

Rosa and Orellana

<sup>1</sup>H- and <sup>13</sup>C-NMR data for ketone 22a

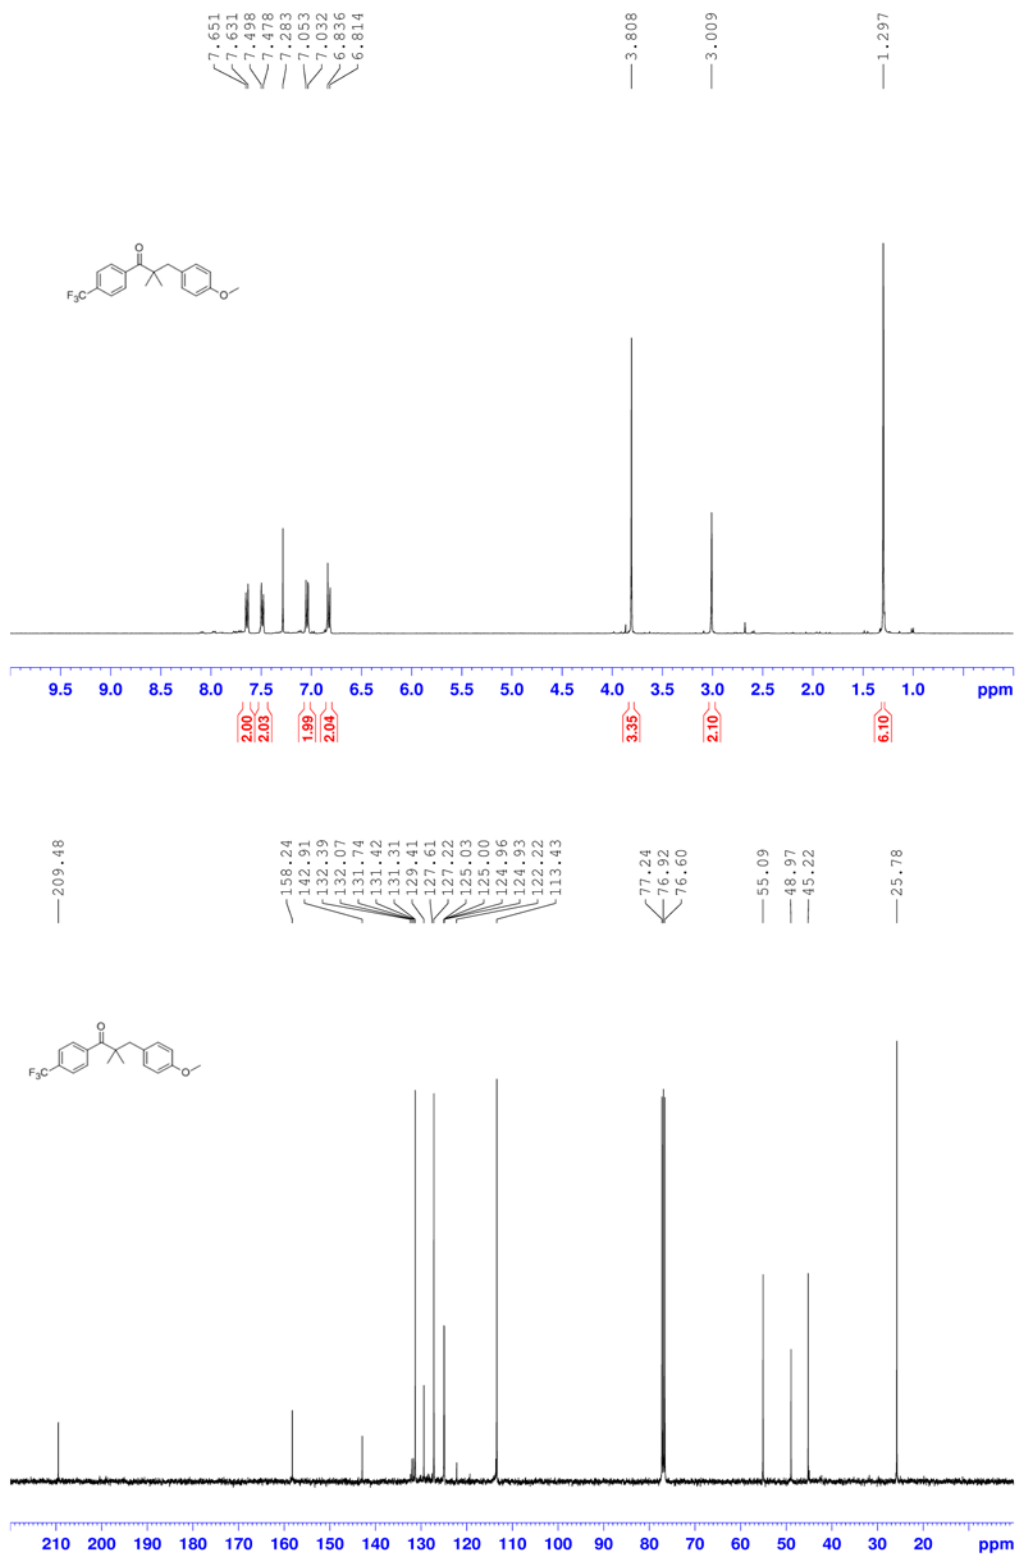

Supplement: c3cc42080a.pdf [file c3cc42080a.pdf]
